# Supplementary material for: Asymmetric organocatalytic conjugated addition of pyrazolin-5-ones to ortho-quinomethanes: construction of vicinal tertiary and all-carbon quaternary stereocenters
Source: Royal Society of Chemistry journal article supplement (doi:10.1039/c9qo00011a), 2019-01-01
Supplement: c9qo00011a1.pdf [file c9qo00011a1.pdf]

# **Asymmetric organocatalytic conjugated addition of pyrazolin-5-ones to *ortho*-quinomethanes: construction of vicinal tertiary and all-carbon quaternary stereocenters**

Ming-Ming Chu,<sup>a</sup> Suo-Suo Qi,<sup>a</sup> Wan-Zhen Ju,<sup>a</sup> Yi-Feng Wang,<sup>a\*</sup> Xue-Yang Chen,<sup>a</sup>  
Dan-Qian Xu,<sup>a\*</sup> Zhen-Yuan Xu<sup>a</sup>

<sup>a</sup> Catalytic Hydrogenation Research Center, State Key Laboratory Breeding Base of Green  
Chemistry-Synthesis Tech-nology, Key Laboratory of Green Pesticides and Cleaner Production  
Technology of Zhejiang Province, Department of Green Chemistry and Technology  
Zhejiang University of Technology  
Hangzhou 310014, China  
E-mail: [chrc@zjut.edu.cn](mailto:chrc@zjut.edu.cn)

## **List of Contents**

|                                                                          |            |
|--------------------------------------------------------------------------|------------|
| <b>1. General information.....</b>                                       | <b>S2</b>  |
| <b>2. General procedure for the synthesis of 3 .....</b>                 | <b>S2</b>  |
| <b>3. Characterization data of products 3.....</b>                       | <b>S2</b>  |
| <b>4. HPLC spectra of products 3.....</b>                                | <b>S21</b> |
| <b>..</b>                                                                |            |
| <b>5. NMR spectra of products 3.....</b>                                 | <b>S47</b> |
| <b>6. Crystal data and structure refinement for enantiopure 3ra.....</b> | <b>S90</b> |

## 1. General information

Unless otherwise stated, all reagents were purchased from commercial suppliers and used without purifications. 2-(phenyl(tosyl)methyl)phenols<sup>[1]</sup> and pyrazolin-5-ones<sup>[2]</sup> were synthesized according to the known method. All reactions were carried out in glassware. Reactions were monitored by TLC on silica gel precoated on glass plates, and spots were visualized with UV light at 254nm. Flash column chromatography was performed on silica-gel. <sup>1</sup>H and <sup>13</sup>C NMR were recorded in CDCl<sub>3</sub> on Bruker AVANCE III (500 MHz). TMS served as internal standard (d= 0 ppm) for <sup>1</sup>H NMR and CDCl<sub>3</sub> was used as internal standard (d= 77.0 ppm) for <sup>13</sup>C NMR; High-resolution electrospray ionization mass spectra (HR-ESI-MS) were recorded on an Agilent 6545 Q-TOF LCMS spectrometer equipped with an ESI source and controlled by using MassHunter software. Specific rotations were performed on a Rudolph Autopol IV automatic polarimeter. Chiral HPLC analyses were performed using Agilent 1260 chromatography. Chiralpak IA, IC, ID, and OD-H columns were purchased from Daicel Chemical Industries (Shanghai, China).

[1] M.-W. Chen, L.-L. Cao, Z.-S. Ye, G.-F. Jiang, Y.-G. Zhou, *Chem. Commun.* **2013**, 49, 1660-1662.

[2] Z. Wang, Z. Yang, D. Chen, X. Liu, L. Lin, X. Feng, *Angew. Chem. Int. Ed.* **2011**, 50, 4928-4932.

## 2. General procedure for the synthesis of 3

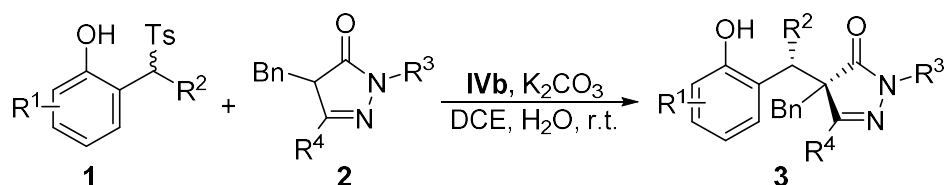

To a test tube were added catalyst **IVb** (0.05 mmol, 5 mol%), K<sub>2</sub>CO<sub>3</sub> (1.2 equiv., 0.12 mmol), the substituted 2-(phenyl(tosyl)methyl)phenol **1** or **4** (0.1 mmol) and pyrazolin-5-ones **2** (1.2 equiv., 0.12 mmol), 1.5 mL DCE and 0.5 mL H<sub>2</sub>O were then added through syringe. The resulting mixture was stirred at room temperature for 12 h. Then it was extracted with CH<sub>2</sub>Cl<sub>2</sub>, and the organic layer was concentrated under reduced pressure. The crude product was purified by flash chromatography to afford the product. The stereoselectivities were determined by Chiral HPLC using a Chiralpak IA, IC, ID, or AD-H column.

## 3. Characterization data of product 3

(*R*)-4-benzyl-4-((*S*)-(2-hydroxy-3-methoxyphenyl)(phenyl)methyl)-5-methyl-2-phenyl-2,4-dihydro-3H-pyrazol-3-one (**3aa**)

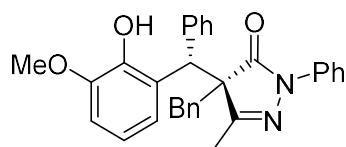

Compound was isolated as a white solid (93% yield) after flash column chromatography on silica-gel. <sup>1</sup>H NMR (500 MHz, CDCl<sub>3</sub>) δ 7.70 (d, *J* = 8.1 Hz, 1H), 7.44 (dd, *J* = 26.6, 7.8 Hz, 4H), 7.31 (t, *J* = 7.9 Hz, 2H), 7.23 (t, *J* = 7.4 Hz, 2H), 7.15 (dq, *J* = 23.1, 7.6 Hz, 7H), 6.92 (t, *J* = 8.1 Hz, 1H), 6.81 (d, *J* = 8.0 Hz, 1H), 6.15 (s, 1H), 5.19 (s, 1H), 3.88 (s, 3H), 3.41 (d, *J* = 13.6 Hz, 1H), 3.14 (d, *J* = 13.6 Hz, 1H), 2.22 (s, 3H). <sup>13</sup>C NMR (126 MHz, CDCl<sub>3</sub>) δ 174.47, 161.62, 146.27, 143.71, 139.26, 137.50, 134.94, 129.24, 128.85, 128.56, 128.48, 128.15, 127.23, 127.09, 125.29, 124.49, 123.94, 120.14, 119.21, 109.33, 63.78, 56.00, 46.78, 40.82, 15.16. [α]<sub>D</sub><sup>25</sup> = 32 (c =

1.0 in CH<sub>2</sub>Cl<sub>2</sub>). The enantiomers were analyzed by HPLC using Daicel Chiralpak IA column at 254 nm (n-hexane/*i*-PrOH = 70/30), 1.0 mL/min; Major enantiomer: *t*<sub>R</sub> = 7.56 min, minor enantiomer: *t*<sub>R</sub> = 11.13 min. 97:3 *dr*, 99% *ee*. HRMS (ESI) calcd for C<sub>31</sub>H<sub>28</sub>N<sub>2</sub>O<sub>3</sub>Na *m/z* [M + Na]<sup>+</sup>: 499.1992, found: 499.1988.

**(*R*)-4-benzyl-4-((*S*)-(2-hydroxy-4-methoxyphenyl)(phenyl)methyl)-5-methyl-2-phenyl-2,4-dihydro-3H-pyrazol-3-one (3ba)**

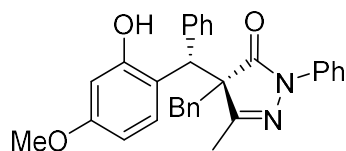

Compound was isolated as a white solid (84% yield) after flash column chromatography on silica-gel. <sup>1</sup>H NMR (500 MHz, CDCl<sub>3</sub>) δ 7.69 – 7.65 (m, 1H), 7.46 – 7.43 (m, 1H), 7.38 (d, *J* = 8.5 Hz, 1H), 7.28 (dd, *J* = 3.1, 2.0 Hz, 6H), 7.14 (dd, *J* = 4.3, 2.3 Hz, 5H), 7.07 (dd, *J* = 6.7, 3.0 Hz, 3H), 6.46 (dd, *J* = 8.6, 2.6 Hz, 1H), 6.40 (s, 1H), 4.88 (s, 1H), 3.60 (s, 3H), 3.37 (d, *J* = 13.7 Hz, 1H), 3.02 (d, *J* = 13.6 Hz, 1H), 2.29 (s, 3H). <sup>13</sup>C NMR (126 MHz, CDCl<sub>3</sub>) δ 175.95, 163.25, 160.16, 155.71, 138.81, 136.63, 134.22, 130.53, 129.13, 129.06, 128.66, 128.62, 128.50, 128.39, 128.23, 128.14, 127.33, 127.26, 126.10, 125.49, 120.69, 106.31, 65.36, 55.04, 46.98, 41.24, 15.16. [α]<sub>D</sub><sup>25</sup> = 74 (*c* = 1.0 in CH<sub>2</sub>Cl<sub>2</sub>). The enantiomers were analyzed by HPLC using Daicel Chiralpak AD-H column at 254 nm (n-hexane/*i*-PrOH = 85/15), 1.0 mL/min; Major enantiomer: *t*<sub>R</sub> = 48.4 min, minor enantiomer: *t*<sub>R</sub> = 12.7 min. 56:44 *dr*, 90% *ee*. HRMS (ESI) calcd for C<sub>31</sub>H<sub>28</sub>N<sub>2</sub>O<sub>3</sub>Na *m/z* [M + Na]<sup>+</sup>: 499.1992, found: 499.1992.

**(*R*)-4-benzyl-4-((*S*)-(3-ethoxy-2-hydroxyphenyl)(phenyl)methyl)-5-methyl-2-phenyl-2,4-dihydro-3H-pyrazol-3-one (3ca)**

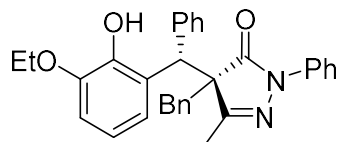

Compound was isolated as a colorless oil (80% yield) after flash column chromatography on silica-gel. <sup>1</sup>H NMR (500 MHz, CDCl<sub>3</sub>) δ 7.68 (dd, *J* = 8.1, 1.3 Hz, 1H), 7.44 (ddd, *J* = 25.7, 8.4, 1.2 Hz, 4H), 7.33 – 7.29 (m, 2H), 7.22 (t, *J* = 7.3 Hz, 2H), 7.17 – 7.10 (m, 7H), 6.89 (t, *J* = 8.1 Hz, 1H), 6.79 (dd, *J* = 8.1, 1.4 Hz, 1H), 6.14 (s, 1H), 6.01 (s, 0H), 5.19 (s, 1H), 4.12 (dd, *J* = 12.7, 7.0 Hz, 2H), 3.41 (d, *J* = 13.6 Hz, 1H), 3.14 (d, *J* = 13.6 Hz, 1H), 2.22 (s, 3H), 1.46 (t, *J* = 7.0 Hz, 3H). <sup>13</sup>C NMR (126 MHz, CDCl<sub>3</sub>) δ 174.46, 161.59, 145.50, 143.79, 139.29, 137.52, 134.97, 129.23, 128.87, 128.54, 128.46, 128.14, 127.20, 127.07, 125.26, 124.45, 123.77, 120.12, 119.17, 110.16, 64.56, 63.77, 46.78, 40.82, 15.16, 14.91. [α]<sub>D</sub><sup>25</sup> = 25 (*c* = 1.0 in CH<sub>2</sub>Cl<sub>2</sub>). The enantiomers were analyzed by HPLC using Daicel Chiralpak ID column at 254 nm (n-hexane/*i*-PrOH = 70/30), 0.7 mL/min; Major enantiomer: *t*<sub>R</sub> = 10.68 min, minor enantiomer: *t*<sub>R</sub> = 43.44 min. 88:12 *dr*, 99% *ee*. HRMS (ESI) calcd for C<sub>32</sub>H<sub>30</sub>N<sub>2</sub>O<sub>3</sub>Na *m/z* [M + Na]<sup>+</sup>: 513.2149, found: 513.2140.

**(*R*)-4-benzyl-4-((*S*)-(4-bromo-2-hydroxy-3-methoxyphenyl)(phenyl)methyl)-5-methyl-2-phenyl-2,4-dihydro-3H-pyrazol-3-one (3da)**

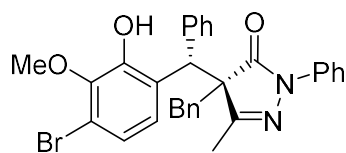

Compound was isolated as a white solid (96% yield) after flash column chromatography on silica-gel. <sup>1</sup>H NMR (500 MHz, CDCl<sub>3</sub>) δ 7.94 (d, *J* = 2.0 Hz, 1H), 7.44 (d, *J* = 7.7 Hz, 2H), 7.38 (d, *J* = 7.3 Hz, 2H), 7.32 (t, *J* = 7.9 Hz, 2H), 7.24 (t, *J* = 7.3 Hz, 2H), 7.17 (dt, *J* = 23.2, 7.8 Hz, 7H), 6.92 (d, *J* = 2.2 Hz, 1H), 6.16 (s, 1H), 5.11 (s, 1H), 3.85 (s, 3H), 3.41 (d, *J* = 13.5 Hz, 1H), 3.07 (d, *J* = 13.5 Hz, 1H), 2.20 (s, 3H). <sup>13</sup>C NMR (126 MHz, CDCl<sub>3</sub>) δ 174.32, 161.22, 146.92, 142.94, 138.52, 137.33, 134.67, 129.22, 128.76, 128.63, 128.60, 128.21, 127.50, 127.21, 126.47, 126.19, 125.50, 120.36, 113.00, 111.33, 63.64, 56.27, 46.64, 40.73, 15.09. [α]<sub>D</sub><sup>25</sup> = 54 (c = 1.0 in CH<sub>2</sub>Cl<sub>2</sub>). The enantiomers were analyzed by HPLC using Daicel Chiralpak IA column at 254 nm (n-hexane/*i*-PrOH = 90/10), 1.0 mL/min; Major enantiomer: *t*<sub>R</sub> = 18.60 min, minor enantiomer: *t*<sub>R</sub> = 34.63 min. 98:2 *dr*, 97% *ee*. HRMS (ESI) calcd for C<sub>31</sub>H<sub>27</sub>N<sub>2</sub>O<sub>3</sub>Na *m/z* [M + Na]<sup>+</sup>: 577.1097, found: 577.1099.

**(*R*)-4-benzyl-4-((*S*)-(3-fluoro-2-hydroxyphenyl)(phenyl)methyl)-5-methyl-2-phenyl-2,4-dihydro-3H-pyrazol-3-one (3ea)**

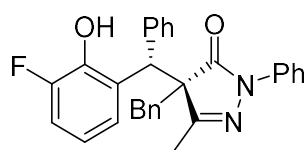

Compound was isolated as white solid (92% yield) after flash column chromatography on silica-gel. <sup>1</sup>H NMR (500 MHz, CDCl<sub>3</sub>) δ 7.73 (dd, *J* = 8.1, 1.3 Hz, 1H), 7.45 (dd, *J* = 8.7, 1.2 Hz, 2H), 7.41 – 7.36 (m, 2H), 7.35 – 7.28 (m, 2H), 7.20 – 7.08 (m, 6H), 6.91 (dd, *J* = 9.6, 8.2 Hz, 3H), 6.82 (dd, *J* = 8.1, 1.3 Hz, 1H), 5.17 (s, 1H), 3.89 (s, 3H), 3.41 (d, *J* = 13.6 Hz, 1H), 3.09 (d, *J* = 13.6 Hz, 1H), 2.23 (s, 3H). <sup>13</sup>C NMR (126 MHz, CDCl<sub>3</sub>) δ 174.77, 161.84, 151.59 (d, *J* = 237.5 Hz), 142.30 (d, *J* = 13.9 Hz), 138.44, 137.06, 134.37, 129.13, 128.61, 128.59 (d, *J* = 5.3 Hz), 128.57, 128.23, 127.50, 127.49 (d, *J* = 2.4), 127.28, 127.09, 125.69, 120.36, 119.67 (d, *J* = 7.4 Hz), 114.39 (d, *J* = 18.3 Hz), 64.13, 47.99, 40.80, 15.07. [α]<sub>D</sub><sup>25</sup> = 65 (c = 1.0 in CH<sub>2</sub>Cl<sub>2</sub>). The enantiomers were analyzed by HPLC using Daicel Chiralpak IA column at 254 nm (n-hexane/*i*-PrOH = 90/10), 1.0 mL/min; Major enantiomer: *t*<sub>R</sub> = 15.28 min, minor enantiomer: *t*<sub>R</sub> = 32.80 min. 95:5 *dr*, 88% *ee*. HRMS (ESI) calcd for C<sub>30</sub>H<sub>25</sub>FN<sub>2</sub>O<sub>2</sub>Na *m/z* [M + Na]<sup>+</sup>: 487.1792, found: 487.1791.

**(*R*)-4-benzyl-4-((*S*)-(4-fluoro-2-hydroxyphenyl)(phenyl)methyl)-5-methyl-2-phenyl-2,4-dihydro-3H-pyrazol-3-one (3fa)**

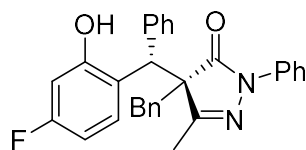

Compound was isolated as a white solid (93% yield) after flash column chromatography on silica-gel. <sup>1</sup>H NMR (500 MHz, CDCl<sub>3</sub>) δ 9.08 (s, 1H), 7.51 – 7.46 (m, 1H), 7.29 – 7.22 (m, 9H), 7.16 (dd, *J* = 4.0, 2.5 Hz, 4H), 7.07 (dd, *J* = 6.5, 3.0 Hz, 2H), 6.63 (td, *J* = 8.3, 2.6 Hz, 1H), 6.56 (dd, *J* = 10.1, 2.2 Hz, 1H), 4.90 (s, 1H), 3.34 (d, *J* = 13.6 Hz, 1H), 3.01 (d, *J* = 13.6 Hz, 1H), 2.30 (s, 3H). <sup>13</sup>C NMR (126 MHz, CDCl<sub>3</sub>) δ 175.84, 163.07, δ 162.90 (d, *J* = 246.2 Hz), 155.97 (d, *J* = 11.3 Hz), 138.28, 136.45, 133.97, 133.35 (d, *J* = 9.5 Hz), 129.05, 128.57 (d, *J* = 19.8 Hz), 128.30, 127.49, 127.45, 126.35, 120.92, 120.48 (d, *J* = 2.9 Hz), 107.05 (d, *J* = 21.1 Hz), 65.16, 49.94, 41.09, 15.11. [α]<sub>D</sub><sup>25</sup> = 102 (c = 1.0 in CH<sub>2</sub>Cl<sub>2</sub>). The enantiomers were analyzed by HPLC using Daicel Chiralpak IA column at 254 nm (n-hexane/*i*-PrOH = 85/15), 0.7 mL/min; Major

enantiomer:  $t_R = 17.6$  min, minor enantiomer:  $t_R = 8.2$  min. 72:28 *dr*, 94% *ee*. HRMS (ESI) calcd for  $C_{30}H_{25}FN_2O_2Na$   $m/z$   $[M + Na]^+$ : 487.1792, found: 487.1792.

**(*R*)-4-benzyl-4-((*S*)-(2-hydroxy-3-(trifluoromethyl)phenyl)(phenyl)methyl)-5-methyl-2-phenyl-2,4-dihydro-3H-pyrazol-3-one (3ga)**

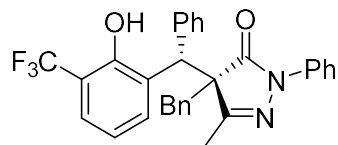

Compound was isolated as a white solid (80% yield) after flash column chromatography on silica-gel.  $^1H$  NMR (500 MHz,  $CDCl_3$ )  $\delta$  7.75 – 7.66 (m, 3H), 7.51 – 7.47 (m, 2H), 7.42 – 7.36 (m, 3H), 7.36 – 7.27 (m, 4H), 7.20 – 7.15 (m, 2H), 7.14 (q,  $J = 1.3$  Hz, 2H), 7.10 – 7.07 (m, 2H), 6.90 (t,  $J = 7.9$  Hz, 1H), 5.90 (s, 1H), 5.16 (s, 1H), 3.34 (d,  $J = 13.4$  Hz, 1H), 3.00 (d,  $J = 13.4$  Hz, 1H), 2.18 (s, 3H).  $^{13}C$  NMR (126 MHz,  $CDCl_3$ )  $\delta$  174.24, 161.56, 150.21, 137.28, 137.02, 134.26, 132.58, 129.15, 128.68, 128.24, 128.23, 127.30,  $\delta$  125.56 (q,  $J = 4.66$  Hz),  $\delta$  124.40 (q,  $J = 273.17$  Hz), 120.94, 119.96,  $\delta$  116.44 (q,  $J = 29.23$  Hz), 62.69, 46.91, 42.01, 14.71.  $[\alpha]_D^{25} = 19$  ( $c = 1.0$  in  $CH_2Cl_2$ ). The enantiomers were analyzed by HPLC using Daicel Chiralpak AD-H column at 254 nm (n-hexane/*i*-PrOH = 85/15), 1.0 mL/min; Major enantiomer:  $t_R = 8.0$  min, minor enantiomer:  $t_R = 5.0$  min. 72:28 *dr*, 94% *ee*. HRMS (ESI) calcd for  $C_{31}H_{25}F_3N_2O_2Na$   $m/z$   $[M + Na]^+$ : 537.1760, found: 487.1759.

**(*R*)-4-benzyl-4-((*S*)-(2-hydroxyphenyl)(phenyl)methyl)-5-methyl-2-phenyl-2,4-dihydro-3H-pyrazol-3-one (3ha)**

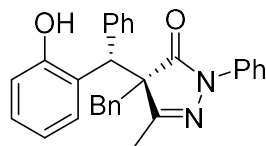

Compound was isolated as a white solid (73% yield) after flash column chromatography on silica-gel.  $\delta$   $^1H$  NMR (500 MHz,  $DMSO-d_6$ )  $\delta$  9.82 (s, 1H), 7.67 (d,  $J = 7.3$  Hz, 2H), 7.45 (d,  $J = 7.6$  Hz, 2H), 7.36 – 7.30 (m, 7H), 7.16 – 7.08 (m, 7H), 6.61 (t,  $J = 8.0$  Hz, 1H), 5.13 (s, 1H), 3.30 (d,  $J = 13.3$  Hz, 1H), 2.94 (d,  $J = 13.2$  Hz, 1H), 2.15 (s, 3H).  $^{13}C$  NMR (126 MHz,  $DMSO-d_6$ )  $\delta$  174.34, 162.39, 154.11, 138.40, 137.29, 134.98, 130.92, 129.02, 128.81, 128.76, 128.26, 127.98, 127.69, 126.98, 126.76, 126.20, 125.03, 119.18, 119.06, 115.47, 62.48, 46.15, 40.81, 14.41.  $[\alpha]_D^{25} = 24$  ( $c = 1.0$  in  $CH_2Cl_2$ ). The enantiomers were analyzed by HPLC using Daicel Chiralpak IA column at 254 nm (n-hexane/*i*-PrOH = 90/10), 1.0 mL/min; Major enantiomer:  $t_R = 31.2$  min, minor enantiomer:  $t_R = 12.4$  min. 64:36 *dr*, 84% *ee*. HRMS (ESI) calcd for  $C_{30}H_{26}N_2O_2Na$   $m/z$   $[M + Na]^+$ : 469.1886, found: 487.1885.

**(*R*)-4-benzyl-4-((*S*)-(2-hydroxy-3-methoxyphenyl)(*m*-tolyl)methyl)-5-methyl-2-phenyl-2,4-dihydro-3H-pyrazol-3-one (3ia)**

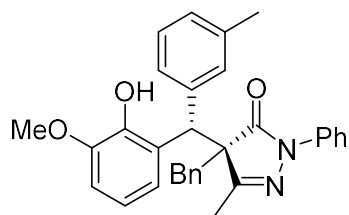

Compound was isolated as white solid (94% yield) after flash column chromatography on silica-gel.  $^1\text{H}$  NMR (500 MHz,  $\text{CDCl}_3$ )  $\delta$  7.50 (dd,  $J = 8.2, 1.4$  Hz, 1H), 7.35 (d,  $J = 7.6$  Hz, 2H), 7.19 (t,  $J = 7.9$  Hz, 2H), 7.07 (d,  $J = 8.4$  Hz, 2H), 7.03 – 6.96 (m, 7H), 6.86 (d,  $J = 7.4$  Hz, 1H), 6.78 (t,  $J = 8.1$  Hz, 1H), 6.67 (dd,  $J = 8.1, 1.3$  Hz, 1H), 6.01 (s, 1H), 5.02 (s, 1H), 3.76 (s, 3H), 3.25 (d,  $J = 13.6$  Hz, 1H), 3.03 (d,  $J = 13.5$  Hz, 1H), 2.10 (s, 3H), 2.08 (s, 3H).  $^{13}\text{C}$  NMR (126 MHz,  $\text{CDCl}_3$ )  $\delta$  174.49, 161.70, 146.17, 143.60, 139.18, 137.98, 137.50, 134.97, 129.42, 129.21, 128.53, 128.34, 128.11, 127.98, 127.03, 125.80, 125.23, 124.41, 123.97, 120.09, 119.14, 109.23, 63.62, 55.96, 46.73, 40.69, 21.42, 15.11.  $[\alpha]_{\text{D}}^{25} = 4$  ( $c = 1.0$  in  $\text{CH}_2\text{Cl}_2$ ). The enantiomers were analyzed by HPLC using Daicel Chiralpak AD-H column at 254 nm (n-hexane/*i*-PrOH = 90/10), 1.0 mL/min; Major enantiomer:  $t_{\text{R}} = 20.67$  min, minor enantiomer:  $t_{\text{R}} = 49.90$  min. 96:4 *dr*, 99% *ee*. HRMS (ESI) calcd for  $\text{C}_{30}\text{H}_{32}\text{N}_2\text{O}_3\text{Na}$   $m/z$   $[\text{M} + \text{Na}]^+$ : 513.2149, found: 513.2148.

**(*R*)-4-benzyl-4-((*S*)-(2-hydroxy-3-methoxyphenyl)(*p*-tolyl)methyl)-5-methyl-2-phenyl-2,4-dihydro-3H-pyrazol-3-one (3ja)**

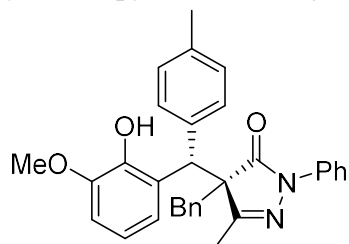

Compound was isolated as colorless oil (94% yield) after flash column chromatography on silica-gel.  $^1\text{H}$  NMR (500 MHz,  $\text{CDCl}_3$ )  $\delta$  7.53 – 7.45 (m, 4H), 7.34 – 7.30 (m, 2H), 7.18 – 7.13 (m, 3H), 7.12 (d,  $J = 2.7$  Hz, 4H), 6.91 – 6.78 (m, 4H), 6.21 (s, 1H), 5.87 (s, 1H), 3.89 (s, 3H), 3.82 (s, 3H), 3.40 (d,  $J = 13.6$  Hz, 1H), 3.26 (d,  $J = 13.6$  Hz, 1H), 2.17 (s, 3H).  $^{13}\text{C}$  NMR (126 MHz,  $\text{CDCl}_3$ )  $\delta$  174.72, 162.30, 156.59, 146.14, 144.08, 137.59, 135.06, 129.26, 129.04, 128.50, 128.25, 128.16, 128.00, 126.93, 125.06, 124.61, 124.02, 120.69, 119.94, 118.74, 111.13, 109.14, 63.48, 55.94, 55.80, 40.85, 37.94, 14.77.  $[\alpha]_{\text{D}}^{25} = -13$  ( $c = 1.0$  in  $\text{CH}_2\text{Cl}_2$ ). The enantiomers were analyzed by HPLC using Daicel Chiralpak IA column at 254 nm (n-hexane/*i*-PrOH = 90/10), 1.0 mL/min; Major enantiomer:  $t_{\text{R}} = 21.00$  min, minor enantiomer:  $t_{\text{R}} = 25.16$  min. 96:4 *dr*, 99% *ee*. HRMS (ESI) calcd for  $\text{C}_{30}\text{H}_{32}\text{N}_2\text{O}_3\text{Na}$   $m/z$   $[\text{M} + \text{Na}]^+$ : 513.2149, found: 513.2141.

**(*R*)-4-benzyl-4-((*R*)-(2-hydroxy-3-methoxyphenyl)(2-methoxyphenyl)methyl)-5-methyl-2-phenyl-2,4-dihydro-3H-pyrazol-3-one (3ka)**

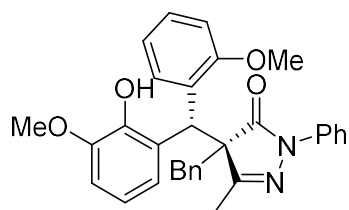

Compound was isolated as a colorless oil (91% yield) after flash column chromatography on silica-gel.  $^1\text{H}$  NMR (500 MHz,  $\text{CDCl}_3$ )  $\delta$  7.64 (d,  $J$  = 8.0 Hz, 1H), 7.48 (dd,  $J$  = 8.5, 1.2 Hz, 2H), 7.34 – 7.28 (m, 4H), 7.17 – 7.09 (m, 6H), 7.04 (d,  $J$  = 7.9 Hz, 2H), 6.91 (t,  $J$  = 8.1 Hz, 1H), 6.80 (dd,  $J$  = 8.1, 1.4 Hz, 1H), 6.14 (s, 1H), 5.16 (s, 1H), 3.88 (s, 3H), 3.39 (d,  $J$  = 13.6 Hz, 1H), 3.16 (d,  $J$  = 13.6 Hz, 1H), 2.26 (s, 3H), 2.22 (s, 3H).  $^{13}\text{C}$  NMR (126 MHz,  $\text{CDCl}_3$ )  $\delta$  174.49, 161.73, 146.20, 143.57, 137.50, 136.77, 136.22, 134.94, 129.19, 129.16, 128.65, 128.52, 128.09, 127.02, 125.21, 124.66, 123.81, 120.08, 119.15, 109.19, 63.75, 55.95, 46.40, 40.83, 20.91, 15.16.  $[\alpha]_{\text{D}}^{25}$  = 4 ( $c$  = 1.0 in  $\text{CH}_2\text{Cl}_2$ ). The enantiomers were analyzed by HPLC using Daicel Chiralpak IA column at 254 nm (n-hexane/*i*-PrOH = 90/10), 1.0 mL/min; Major enantiomer:  $t_{\text{R}}$  = 29.36 min, minor enantiomer:  $t_{\text{R}}$  = 32.49 min. 93:7 *dr*, 99% *ee*. HRMS (ESI) calcd for  $\text{C}_{32}\text{H}_{30}\text{N}_2\text{O}_4\text{Na}$   $m/z$   $[\text{M} + \text{Na}]^+$ : 529.2098, found: 529.2095.

**(*R*)-4-benzyl-4-((*S*)-(2-hydroxy-3-methoxyphenyl)(3-methoxyphenyl)methyl)-5-methyl-2-phenyl-2,4-dihydro-3H-pyrazol-3-one (3la)**

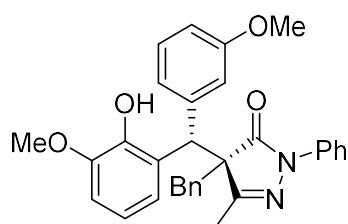

Compound was isolated as colorless oil (93% yield) after flash column chromatography on silica-gel.  $^1\text{H}$  NMR (500 MHz,  $\text{CDCl}_3$ )  $\delta$  7.65 (d,  $J$  = 7.8 Hz, 1H), 7.50 (d,  $J$  = 7.7 Hz, 2H), 7.31 (t,  $J$  = 7.9 Hz, 2H), 7.17 – 7.08 (m, 7H), 7.01 – 6.95 (m, 2H), 6.91 (t,  $J$  = 8.1 Hz, 1H), 6.80 (d,  $J$  = 7.3 Hz, 1H), 6.72 (dd,  $J$  = 8.1, 2.1 Hz, 1H), 6.14 (s, 1H), 5.16 (s, 1H), 3.88 (s, 3H), 3.64 (s, 3H), 3.37 (d,  $J$  = 13.5 Hz, 1H), 3.15 (d,  $J$  = 13.5 Hz, 1H), 2.22 (s, 3H).  $^{13}\text{C}$  NMR (126 MHz,  $\text{CDCl}_3$ )  $\delta$  174.44, 161.67, 159.51, 146.19, 143.64, 140.81, 137.52, 134.84, 129.41, 129.20, 128.52, 128.10, 127.06, 125.18, 124.27, 123.87, 121.15, 119.92, 119.17, 114.33, 112.85, 109.29, 63.61, 55.97, 55.00, 46.69, 40.83, 15.13.  $[\alpha]_{\text{D}}^{25}$  = -3 ( $c$  = 1.0 in  $\text{CH}_2\text{Cl}_2$ ). The enantiomers were analyzed by HPLC using Daicel Chiralpak IA column at 254 nm (n-hexane/*i*-PrOH = 90/10), 1.0 mL/min; Major enantiomer:  $t_{\text{R}}$  = 20.28 min, minor enantiomer:  $t_{\text{R}}$  = 36.74 min. 95:5 *dr*, 99% *ee*. HRMS (ESI) calcd for  $\text{C}_{32}\text{H}_{30}\text{N}_2\text{O}_4\text{Na}$   $m/z$   $[\text{M} + \text{Na}]^+$ : 529.2098, found: 529.2093.

**(*R*)-4-benzyl-4-((*S*)-(2-hydroxy-3-methoxyphenyl)(4-methoxyphenyl)methyl)-5-methyl-2-phenyl-2,4-dihydro-3H-pyrazol-3-one (3ma)**

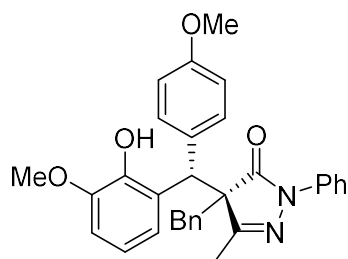

Compound was isolated as a colorless oil (93% yield) after flash column chromatography on silica-gel.  $^1\text{H}$  NMR (500 MHz,  $\text{CDCl}_3$ )  $\delta$  7.64 (d,  $J$  = 8.0 Hz, 1H), 7.48 (dd,  $J$  = 8.5, 1.2 Hz, 2H), 7.34 – 7.28 (m, 4H), 7.17 – 7.09 (m, 6H), 7.04 (d,  $J$  = 7.9 Hz, 2H), 6.91 (t,  $J$  = 8.1 Hz, 1H), 6.80 (dd,  $J$  = 8.1, 1.4 Hz, 1H), 6.14 (s, 1H), 5.16 (s, 1H), 3.88 (s, 3H), 3.39 (d,  $J$  = 13.6 Hz, 1H), 3.16 (d,  $J$  = 13.6 Hz, 1H), 2.26 (s, 3H), 2.22 (s, 3H).  $^{13}\text{C}$  NMR (126 MHz,  $\text{CDCl}_3$ )  $\delta$  174.51, 161.74,

158.57, 146.22, 143.52, 137.47, 134.96, 131.30, 129.87, 129.16, 128.52, 128.10, 127.02, 125.22, 124.83, 123.69, 120.05, 119.16, 113.80, 109.18, 63.94, 55.94, 55.09, 45.93, 40.76, 15.16.  $[\alpha]_D^{25} = 4$  ( $c = 1.0$  in  $\text{CH}_2\text{Cl}_2$ ). The enantiomers were analyzed by HPLC using Daicel Chiralpak AD-H column at 254 nm ( $n$ -hexane/ $i$ -PrOH = 80/20), 0.7 mL/min; Major enantiomer:  $t_R = 30.42$  min, minor enantiomer:  $t_R = 51.01$  min. 87:13 *dr*, 99% *ee*. HRMS (ESI) calcd for  $\text{C}_{32}\text{H}_{30}\text{N}_2\text{O}_4\text{Na}$   $m/z$   $[\text{M} + \text{Na}]^+$ : 529.2098, found: 529.2093.

**(*R*)-4-((*R*)-benzo[d][1,3]dioxol-4-yl(2-hydroxy-3-methoxyphenyl)methyl)-4-benzyl-5-methyl-2-phenyl-2,4-dihydro-3H-pyrazol-3-one (3na)**

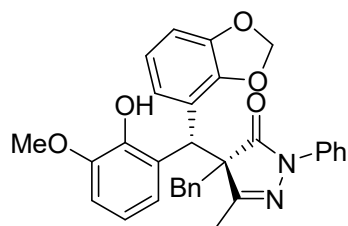

Compound was isolated as a colorless oil (83% yield) after flash column chromatography on silica-gel.  $^1\text{H}$  NMR (500 MHz,  $\text{CDCl}_3$ )  $\delta$  7.70 (dd,  $J = 8.1, 1.3$  Hz, 1H), 7.50 – 7.43 (m, 2H), 7.34 – 7.30 (m, 2H), 7.14 (dt,  $J = 7.6, 4.8$  Hz, 4H), 7.09 (dd,  $J = 7.4, 2.1$  Hz, 2H), 6.95 – 6.86 (m, 3H), 6.80 (dd,  $J = 8.1, 1.2$  Hz, 1H), 6.66 (d,  $J = 8.1$  Hz, 1H), 6.14 (s, 1H), 5.85 (dd,  $J = 11.3, 1.5$  Hz, 2H), 5.10 (s, 1H), 3.88 (s, 3H), 3.37 (d,  $J = 13.5$  Hz, 1H), 3.09 (d,  $J = 13.6$  Hz, 1H), 2.24 (s, 3H).  $^{13}\text{C}$  NMR (126 MHz,  $\text{CDCl}_3$ )  $\delta$  174.43, 161.65, 147.58, 146.59, 146.22, 143.51, 137.43, 134.86, 132.97, 129.16, 128.56, 128.54, 128.11, 127.05, 125.29, 124.65, 123.56, 122.04, 120.11, 119.25, 109.33, 109.28, 108.08, 100.92, 63.88, 55.95, 46.27, 40.78, 15.18.  $[\alpha]_D^{25} = 6$  ( $c = 1.0$  in  $\text{CH}_2\text{Cl}_2$ ). The enantiomers were analyzed by HPLC using Daicel Chiralpak IA column at 254 nm ( $n$ -hexane/ $i$ -PrOH = 90/10), 1.0 mL/min; Major enantiomer:  $t_R = 31.82$  min, minor enantiomer:  $t_R = 52.97$  min. 88:12 *dr*, 97% *ee*. HRMS (ESI) calcd for  $\text{C}_{32}\text{H}_{28}\text{N}_2\text{O}_5\text{Na}$   $m/z$   $[\text{M} + \text{Na}]^+$ : 543.1890, found: 543.1886.

**(*R*)-4-benzyl-4-((*S*)-(2-hydroxy-3-methoxyphenyl)(3-(trifluoromethoxy)phenyl)methyl)-5-methyl-2-phenyl-2,4-dihydro-3H-pyrazol-3-one (3oa)**

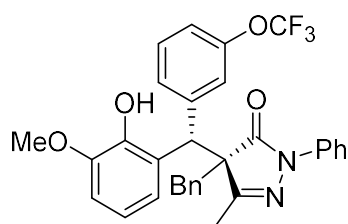

Compound was isolated as colorless oil (81% yield) after flash column chromatography on silica-gel.  $^1\text{H}$  NMR (500 MHz,  $\text{CDCl}_3$ )  $\delta$  7.74 (dd,  $J = 8.2, 1.4$  Hz, 1H), 7.48 – 7.40 (m, 2H), 7.36 (d,  $J = 7.9$  Hz, 1H), 7.31 (t,  $J = 8.0$  Hz, 2H), 7.25 (dd,  $J = 17.4, 9.4$  Hz, 2H), 7.15 (q,  $J = 6.4, 4.7$  Hz, 4H), 7.10 (dd,  $J = 7.3, 2.0$  Hz, 2H), 7.05 (d,  $J = 8.2$  Hz, 1H), 6.94 (t,  $J = 8.1$  Hz, 1H), 6.83 (dd,  $J = 8.1, 1.3$  Hz, 1H), 6.13 (s, 1H), 5.19 (s, 1H), 3.89 (s, 3H), 3.41 (d,  $J = 13.6$  Hz, 1H), 3.08 (d,  $J = 13.6$  Hz, 1H), 2.22 (s, 3H).  $^{13}\text{C}$  NMR (126 MHz,  $\text{CDCl}_3$ )  $\delta$  174.12, 161.16, 149.10, 146.30, 143.72, 141.54, 137.29, 134.62, 129.74, 129.17, 128.53, 128.20, 127.19, 127.09, 125.39, 123.67, 123.54, 121.73, 120.37 (q,  $J = 257.3$  Hz), 120.02, 119.53, 119.43, 109.56, 63.68, 55.97, 46.18, 40.69, 15.06.  $[\alpha]_D^{25} = 35$  ( $c = 1.0$  in  $\text{CH}_2\text{Cl}_2$ ). The enantiomers were analyzed by HPLC using Daicel Chiralpak IA column at 254 nm ( $n$ -hexane/ $i$ -PrOH = 90/10), 1.0 mL/min; Major enantiomer:  $t_R =$

13.75 min, minor enantiomer:  $t_R$  = 19.64 min. 98:2 *dr*, 99% *ee*. HRMS (ESI) calcd for  $C_{32}H_{27}F_3N_2O_4Na$   $m/z$   $[M + Na]^+$ : 583.1815, found: 583.1809.

**(*R*)-4-benzyl-4-((*S*)-(2-hydroxy-3-methoxyphenyl)(4-(trifluoromethoxy)phenyl)methyl)-5-methyl-2-phenyl-2,4-dihydro-3H-pyrazol-3-one (3pa)**

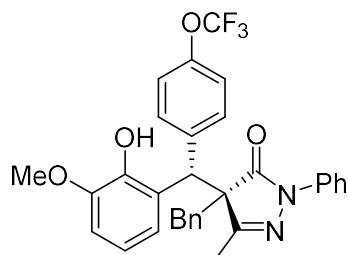

Compound was isolated as a colorless oil (89% yield) after flash column chromatography on silica-gel.  $^1H$  NMR (500 MHz,  $CDCl_3$ )  $\delta$  7.78 (dd,  $J$  = 8.2, 1.4 Hz, 1H), 7.42 (t,  $J$  = 9.1 Hz, 4H), 7.31 (t,  $J$  = 8.0 Hz, 2H), 7.18 – 7.13 (m, 4H), 7.13 – 7.10 (m, 2H), 7.07 (d,  $J$  = 8.2 Hz, 2H), 6.95 (t,  $J$  = 8.1 Hz, 1H), 6.83 (dd,  $J$  = 8.1, 1.4 Hz, 1H), 6.14 (s, 1H), 5.19 (s, 1H), 3.90 (s, 3H), 3.43 (d,  $J$  = 13.6 Hz, 1H), 3.06 (d,  $J$  = 13.6 Hz, 1H), 2.24 (s, 3H).  $^{13}C$  NMR (126 MHz,  $CDCl_3$ )  $\delta$  174.26, 161.29, 148.24, 146.32, 143.70, 137.85, 137.26, 134.75, 130.23, 129.15, 128.60, 128.22, 127.18, 125.50, 123.97, 123.69, 120.73, 120.36 (q,  $J$  = 257.3 Hz), 120.14, 119.40, 109.50, 63.80, 55.98, 45.79, 40.52, 15.08.  $[\alpha]_D^{25}$  = 32 ( $c$  = 1.0 in  $CH_2Cl_2$ ). The enantiomers were analyzed by HPLC using Daicel Chiralpak IA column at 254 nm (*n*-hexane/*i*-PrOH = 90/10), 0.7 mL/min; Major enantiomer:  $t_R$  = 22.70 min, minor enantiomer:  $t_R$  = 25.78 min. 96:4 *dr*, 99% *ee*. HRMS (ESI) calcd for  $C_{32}H_{27}N_2O_4Na$   $m/z$   $[M + Na]^+$ : 583.1815, found: 583.1808.

**(*R*)-4-benzyl-4-((*S*)-(4-fluorophenyl)(2-hydroxy-3-methoxyphenyl)methyl)-5-methyl-2-phenyl-2,4-dihydro-3H-pyrazol-3-one (3qa)**

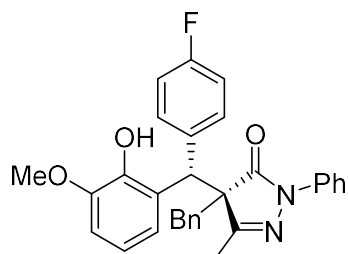

Compound was isolated as a white solid (95% yield) after flash column chromatography on silica-gel.  $^1H$  NMR (500 MHz,  $CDCl_3$ )  $\delta$  7.73 (dd,  $J$  = 8.1, 1.3 Hz, 1H), 7.45 (dd,  $J$  = 8.7, 1.2 Hz, 2H), 7.41 – 7.36 (m, 2H), 7.35 – 7.28 (m, 2H), 7.20 – 7.08 (m, 6H), 6.91 (dd,  $J$  = 9.6, 8.2 Hz, 3H), 6.82 (dd,  $J$  = 8.1, 1.3 Hz, 1H), 5.17 (s, 1H), 3.89 (s, 3H), 3.41 (d,  $J$  = 13.6 Hz, 1H), 3.09 (d,  $J$  = 13.6 Hz, 1H), 2.23 (s, 3H).  $^{13}C$  NMR (126 MHz,  $CDCl_3$ )  $\delta$  174.34, 161.84 (d,  $J$  = 246.2 Hz), 161.45, 146.27, 143.61, 137.34, 135.01 (d,  $J$  = 3.4 Hz), 134.80, 130.40 (d,  $J$  = 8.0 Hz), 129.14, 128.59, 128.17, 127.12, 125.38, 124.30, 123.64, 120.03, 119.31, 115.27 (d,  $J$  = 21.2 Hz), 109.37, 63.87, 55.96, 45.79, 40.63, 15.09.  $[\alpha]_D^{25}$  = 39 ( $c$  = 1.0 in  $CH_2Cl_2$ ). The enantiomers were analyzed by HPLC using Daicel Chiralpak ID column at 254 nm (*n*-hexane/*i*-PrOH = 70/30), 1.0 mL/min; Major enantiomer:  $t_R$  = 12.82 min, minor enantiomer:  $t_R$  = 50.63 min. 93:7 *dr*, 99% *ee*. HRMS (ESI) calcd for  $C_{31}H_{27}FN_2O_3Na$   $m/z$   $[M + Na]^+$ : 517.1898, found: 517.1984.

**(*R*)-4-benzyl-4-((*S*)-(4-chlorophenyl)(2-hydroxy-3-methoxyphenyl)methyl)-5-methyl-2-phenyl-2,4-dihydro-3H-pyrazol-3-one (3ra)**

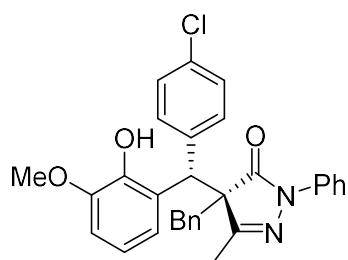

Compound was isolated as a white solid (93% yield) after flash column chromatography on silica-gel.  $^1\text{H}$  NMR (500 MHz,  $\text{CDCl}_3$ )  $\delta$  7.68 (dd,  $J = 8.2, 1.4$  Hz, 1H), 7.46 (dd,  $J = 8.6, 1.2$  Hz, 2H), 7.36 – 7.30 (m, 4H), 7.22 – 7.16 (m, 3H), 7.16 – 7.12 (m, 3H), 7.10 (dd,  $J = 7.4, 2.1$  Hz, 2H), 6.92 (t,  $J = 8.1$  Hz, 1H), 6.81 (dd,  $J = 8.1, 1.4$  Hz, 1H), 6.13 (s, 1H), 5.16 (s, 1H), 3.89 (s, 3H), 3.40 (d,  $J = 13.6$  Hz, 1H), 3.10 (d,  $J = 13.6$  Hz, 1H), 2.22 (s, 3H).  $^{13}\text{C}$  NMR (126 MHz,  $\text{CDCl}_3$ )  $\delta$  174.24, 161.36, 146.26, 143.62, 137.81, 137.32, 134.68, 133.09, 130.15, 129.15, 128.60, 128.17, 127.15, 125.41, 123.98, 123.60, 120.03, 119.34, 109.44, 63.65, 55.97, 45.95, 40.69, 15.10.  $[\alpha]_{\text{D}}^{25} = 11$  ( $c = 1.0$  in  $\text{CH}_2\text{Cl}_2$ ). The enantiomers were analyzed by HPLC using Daicel Chiralpak ID column at 254 nm (n-hexane/*i*-PrOH = 70/30), 1.0 mL/min; Major enantiomer:  $t_{\text{R}} = 20.00$  min, minor enantiomer:  $t_{\text{R}} = 24.35$  min. 95:5 *dr*, 99% *ee*. HRMS (ESI) calcd for  $\text{C}_{31}\text{H}_{27}\text{ClN}_2\text{O}_3\text{Na}$   $m/z$   $[\text{M} + \text{Na}]^+$ : 533.1602, found: 533.1596.

**(*R*)-4-benzyl-4-((*S*)-(2-hydroxy-3-methoxyphenyl)(2-(trifluoromethyl)phenyl)methyl)-5-methyl-2-phenyl-2,4-dihydro-3H-pyrazol-3-one (3sa)**

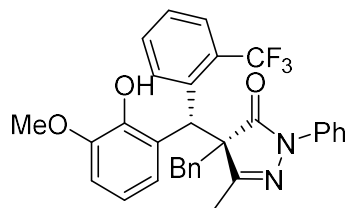

Compound was isolated as a white solid (89% yield) after flash column chromatography on silica-gel.  $^1\text{H}$  NMR (500 MHz,  $\text{CDCl}_3$ )  $\delta$  7.67 (d,  $J = 7.7$  Hz, 1H), 7.56 (dd,  $J = 11.2, 7.6$  Hz, 3H), 7.41 (t,  $J = 7.7$  Hz, 1H), 7.37 – 7.31 (m, 3H), 7.17 (t,  $J = 7.3$  Hz, 1H), 7.09 (q,  $J = 5.8, 5.2$  Hz, 5H), 6.84 (h,  $J = 7.3$  Hz, 3H), 6.17 (s, 1H), 5.72 (s, 1H), 3.93 (s, 3H), 3.55 (d,  $J = 13.4$  Hz, 1H), 3.34 (d,  $J = 13.3$  Hz, 1H), 2.07 (s, 3H).  $^{13}\text{C}$  NMR (126 MHz,  $\text{CDCl}_3$ )  $\delta$  173.89, 161.48, 146.16, 143.80, 138.81, 137.54, 134.28, 132.16, 129.47, 128.69, 128.63, 128.27 (q,  $J = 29.5$  Hz), 127.95, 127.33, 127.14, 126.83 (q,  $J = 6.3$  Hz), 125.20, 124.88, 121.42, 124.21 (q,  $J = 274.8$  Hz), 119.65, 118.21, 109.43, 63.17, 56.05, 41.96, 41.84, 14.45.  $[\alpha]_{\text{D}}^{25} = -125$  ( $c = 1.0$  in  $\text{CH}_2\text{Cl}_2$ ). The enantiomers were analyzed by HPLC using Daicel Chiralpak IA column at 254 nm (n-hexane/*i*-PrOH = 90/10), 1.0 mL/min; Major enantiomer:  $t_{\text{R}} = 8.55$  min, minor enantiomer:  $t_{\text{R}} = 10.94$  min. 99:1 *dr*, 99% *ee*. HRMS (ESI) calcd for  $\text{C}_{32}\text{H}_{27}\text{F}_3\text{N}_2\text{O}_3\text{Na}$   $m/z$   $[\text{M} + \text{Na}]^+$ : 567.1866, found: 567.1859.

**(*R*)-4-benzyl-4-((*S*)-(2-hydroxy-3-methoxyphenyl)(3-(trifluoromethyl)phenyl)methyl)-5-methyl-2-phenyl-2,4-dihydro-3H-pyrazol-3-one (3ta)**

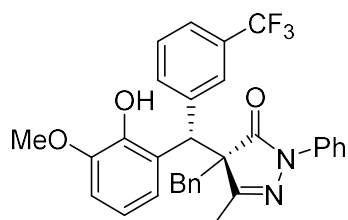

Compound was isolated as white solid (92% yield) after flash column chromatography on silica-gel.  $^1\text{H}$  NMR (500 MHz,  $\text{CDCl}_3$ )  $\delta$  7.75 (dd,  $J$  = 8.2, 1.3 Hz, 1H), 7.68 (s, 1H), 7.62 (d,  $J$  = 8.3 Hz, 1H), 7.48 – 7.41 (m, 3H), 7.36 – 7.29 (m, 3H), 7.16 (q,  $J$  = 6.4, 5.1 Hz, 4H), 7.11 (dd,  $J$  = 7.4, 2.0 Hz, 2H), 6.95 (t,  $J$  = 8.1 Hz, 1H), 6.83 (dd,  $J$  = 8.1, 1.4 Hz, 1H), 6.15 (s, 1H), 5.25 (s, 1H), 3.89 (s, 3H), 3.43 (d,  $J$  = 13.6 Hz, 1H), 3.10 (d,  $J$  = 13.6 Hz, 1H), 2.22 (s, 3H).  $^{13}\text{C}$  NMR (126 MHz,  $\text{CDCl}_3$ )  $\delta$  174.11, 161.15, 146.29, 143.72, 140.30, 137.23, 134.63, 132.04, 130.73 (q,  $J$  = 32.0 Hz), 129.16, 128.97, 128.56, 128.22, 127.20, 125.70 (q,  $J$  = 3.8 Hz), 125.45, 124.12 (q,  $J$  = 3.7 Hz), 123.90 (q,  $J$  = 272.5 Hz), 123.58, 123.55, 120.04, 119.47, 109.58, 63.63, 55.97, 46.32, 40.54, 15.03.  $[\alpha]_{\text{D}}^{25}$  = 20 ( $c$  = 1.0 in  $\text{CH}_2\text{Cl}_2$ ). The enantiomers were analyzed by HPLC using Daicel Chiralpak IA column at 254 nm (n-hexane/*i*-PrOH = 90/10), 1.0 mL/min; Major enantiomer:  $t_{\text{R}}$  = 13.37 min, minor enantiomer:  $t_{\text{R}}$  = 18.64 min. 97:3 *dr*, 99% *ee*. HRMS (ESI) calcd for  $\text{C}_{32}\text{H}_{27}\text{F}_3\text{N}_2\text{O}_3\text{Na}$   $m/z$   $[\text{M} + \text{Na}]^+$ : 567.1866, found: 567.1856.

**(*R*)-4-benzyl-4-((*S*)-(2-hydroxy-3-methoxyphenyl)(4-(trifluoromethyl)phenyl)methyl)-5-methyl-2-phenyl-2,4-dihydro-3H-pyrazol-3-one (3ua)**

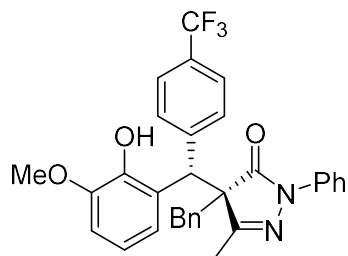

Compound was isolated as a colorless oil (90% yield) after flash column chromatography on silica-gel.  $^1\text{H}$  NMR (500 MHz,  $\text{CDCl}_3$ )  $\delta$  7.72 (dd,  $J$  = 8.1, 1.4 Hz, 1H), 7.50 (q,  $J$  = 8.4 Hz, 4H), 7.46 – 7.40 (m, 2H), 7.36 – 7.29 (m, 2H), 7.19 – 7.13 (m, 4H), 7.11 (dd,  $J$  = 7.4, 2.0 Hz, 2H), 6.94 (t,  $J$  = 8.1 Hz, 1H), 6.83 (dd,  $J$  = 8.1, 1.4 Hz, 1H), 6.14 (s, 1H), 5.25 (s, 1H), 3.89 (s, 3H), 3.43 (d,  $J$  = 13.5 Hz, 1H), 3.10 (d,  $J$  = 13.6 Hz, 1H), 2.23 (s, 3H).  $^{13}\text{C}$  NMR (126 MHz,  $\text{CDCl}_3$ )  $\delta$  174.14, 161.19, 146.31, 143.73, 143.36, 137.25, 134.57, 129.17, 129.41 (q,  $J$  = 32.6 Hz), 128.63, 128.22, 127.23, 125.41 (q,  $J$  = 3.7 Hz), 123.98 (q,  $J$  = 272.7 Hz), 123.69, 123.54, 120.07, 119.44, 109.60, 63.52, 55.99, 46.32, 40.66, 15.09.  $[\alpha]_{\text{D}}^{25}$  = 21 ( $c$  = 1.0 in  $\text{CH}_2\text{Cl}_2$ ). The enantiomers were analyzed by HPLC using Daicel Chiralpak IA column at 254 nm (n-hexane/*i*-PrOH = 95/5), 1.0 mL/min; Major enantiomer:  $t_{\text{R}}$  = 28.40 min, minor enantiomer:  $t_{\text{R}}$  = 30.18 min. 97:3 *dr*, 98% *ee*. HRMS (ESI) calcd for  $\text{C}_{32}\text{H}_{27}\text{F}_3\text{N}_2\text{O}_3\text{Na}$   $m/z$   $[\text{M} + \text{Na}]^+$ : 567.1866, found: 567.1860.

**(*R*)-4-benzyl-4-((*S*)-(3,5-bis(trifluoromethyl)phenyl)(2-hydroxy-3-methoxyphenyl)methyl)-5-methyl-2-phenyl-2,4-dihydro-3H-pyrazol-3-one (3va)**

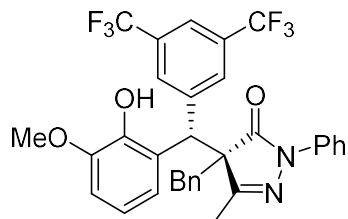

Compound was isolated as a colorless oil (95% yield) after flash column chromatography on silica-gel.  $^1\text{H}$  NMR (500 MHz,  $\text{CDCl}_3$ )  $\delta$  7.88 (s, 2H), 7.83 (d,  $J$  = 8.1 Hz, 1H), 7.71 (s, 1H), 7.43 (d,  $J$  = 7.7 Hz, 2H), 7.32 (t,  $J$  = 7.9 Hz, 2H), 7.19 – 7.14 (m, 4H), 7.10 (dd,  $J$  = 7.1, 2.3 Hz, 2H), 6.99 (t,  $J$  = 8.1 Hz, 1H), 6.86 (dd,  $J$  = 8.2, 1.3 Hz, 1H), 6.14 (s, 1H), 5.30 (s, 1H), 3.91 (s, 3H),

3.46 (d,  $J = 13.6$  Hz, 1H), 3.05 (d,  $J = 13.7$  Hz, 1H), 2.23 (s, 3H).  $^{13}\text{C}$  NMR (126 MHz,  $\text{CDCl}_3$ )  $\delta$  173.81, 160.71, 146.38, 143.78, 141.94, 137.00, 134.39, 131.71 (q,  $J = 33.4$  Hz) 129.14, 129.01 (q,  $J = 2.65$  Hz), 128.58, 128.34, 127.35, 125.64, 123.26, 123.08 (q,  $J = 273.42$  Hz), 122.72, 121.23-121.41 (m), 119.96, 119.86, 109.93, 63.54, 56.02, 46.06, 40.33, 14.97.  $[\alpha]_{\text{D}}^{25} = 15$  ( $c = 1.0$  in  $\text{CH}_2\text{Cl}_2$ ). The enantiomers were analyzed by HPLC using Daicel Chiralpak IA column at 254 nm (n-hexane/*i*-PrOH = 95/5), 1.0 mL/min; Major enantiomer:  $t_{\text{R}} = 12.09$  min, minor enantiomer:  $t_{\text{R}} = 15.96$  min. 97:3 *dr*, 99% *ee*. HRMS (ESI) calcd for  $\text{C}_{33}\text{H}_{26}\text{F}_6\text{N}_2\text{O}_3\text{Na}$   $m/z$   $[\text{M} + \text{Na}]^+$ : 635.1740, found: 635.1729.

**(*R*)-4-((*S*)-[1,1'-biphenyl]-4-yl(2-hydroxy-3-methoxyphenyl)methyl)-4-benzyl-5-methyl-2-phenyl-2,4-dihydro-3H-pyrazol-3-one (3wa)**

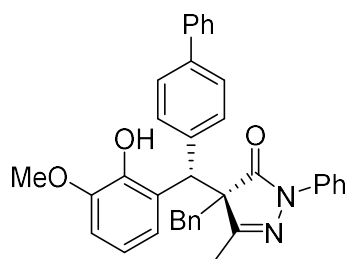

Compound was isolated as white solid (90% yield) after flash column chromatography on silica-gel.  $^1\text{H}$  NMR (500 MHz,  $\text{CDCl}_3$ )  $\delta$  7.73 (d,  $J = 7.9$  Hz, 1H), 7.52 (d,  $J = 7.4$  Hz, 2H), 7.48 (dd,  $J = 7.5, 4.3$  Hz, 6H), 7.41 (t,  $J = 7.6$  Hz, 2H), 7.32 (t,  $J = 7.9$  Hz, 3H), 7.15 (p,  $J = 7.0, 6.3$  Hz, 6H), 6.95 (t,  $J = 8.1$  Hz, 1H), 6.82 (d,  $J = 7.7$  Hz, 1H), 6.17 (s, 1H), 5.24 (s, 1H), 3.90 (s, 3H), 3.43 (d,  $J = 13.5$  Hz, 1H), 3.17 (d,  $J = 13.6$  Hz, 1H), 2.27 (s, 3H).  $^{13}\text{C}$  NMR (126 MHz,  $\text{CDCl}_3$ )  $\delta$  174.44, 161.63, 146.26, 143.67, 140.52, 139.98, 138.26, 137.45, 134.88, 129.21, 128.65, 128.57, 128.15, 127.19, 127.13, 127.09, 126.94, 125.32, 124.38, 123.87, 120.15, 119.26, 109.34, 63.76, 55.98, 46.39, 40.78, 15.20.  $[\alpha]_{\text{D}}^{25} = -51$  ( $c = 1.0$  in  $\text{CH}_2\text{Cl}_2$ ). The enantiomers were analyzed by HPLC using Daicel Chiralpak IA column at 254 nm (n-hexane/*i*-PrOH = 90/10), 1.0 mL/min; Major enantiomer:  $t_{\text{R}} = 25.44$  min, minor enantiomer:  $t_{\text{R}} = 24.17$  min. 95:5 *dr*, 99% *ee*. HRMS (ESI) calcd for  $\text{C}_{37}\text{H}_{32}\text{N}_2\text{O}_3\text{Na}$   $m/z$   $[\text{M} + \text{Na}]^+$ : 575.2305, found: 575.2296.

**(*R*)-4-benzyl-4-((*S*)-(2-hydroxy-3-methoxyphenyl)(naphthalen-1-yl)methyl)-5-methyl-2-phenyl-2,4-dihydro-3H-pyrazol-3-one (3xa)**

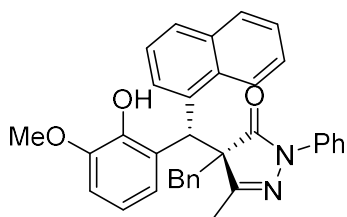

Compound was isolated as white solid (91% yield) after flash column chromatography on silica-gel.  $^1\text{H}$  NMR (500 MHz,  $\text{CDCl}_3$ )  $\delta$  8.42 (d,  $J = 8.6$  Hz, 1H), 7.82 (d,  $J = 7.8$  Hz, 1H), 7.73 (d,  $J = 8.2$  Hz, 1H), 7.66 – 7.60 (m, 2H), 7.57 – 7.52 (m, 2H), 7.47 (d,  $J = 7.2$  Hz, 1H), 7.37 (t,  $J = 7.2$  Hz, 2H), 7.35 – 7.31 (m, 1H), 7.22 – 7.11 (m, 7H), 6.86 – 6.75 (m, 2H), 6.37 (s, 1H), 6.08 (s, 1H), 3.91 (s, 3H), 3.54 (d,  $J = 13.2$  Hz, 1H), 3.38 (d,  $J = 13.2$  Hz, 1H), 1.96 (s, 3H).  $^{13}\text{C}$  NMR (126 MHz,  $\text{CDCl}_3$ )  $\delta$  174.34, 161.93, 145.88, 143.26, 137.67, 136.43, 134.42, 134.04, 131.77, 129.42, 128.93, 128.61, 127.96, 127.95, 127.11, 126.64, 125.54, 125.37, 125.23, 125.15, 123.88, 123.01, 122.70, 119.83, 118.82, 109.31, 62.75, 55.98, 41.80, 41.47, 14.60.  $[\alpha]_{\text{D}}^{25} = -182$  ( $c = 1.0$  in  $\text{CH}_2\text{Cl}_2$ ). The

enantiomers were analyzed by HPLC using Daicel Chiralpak IA column at 254 nm (n-hexane/*i*-PrOH = 90/10), 1.0 mL/min; Major enantiomer:  $t_R$  = 20.70 min, minor enantiomer:  $t_R$  = 27.63 min. 98:2 *dr*, 99% *ee*. HRMS (ESI) calcd for  $C_{35}H_{30}N_2O_3Na$   $m/z$   $[M + Na]^+$ : 549.2153, found: 549.2149.

**(*R*)-4-benzyl-4-((*S*)-(2-hydroxy-3-methoxyphenyl)(naphthalen-2-yl)methyl)-5-methyl-2-phenyl-2,4-dihydro-3H-pyrazol-3-one (3ya)**

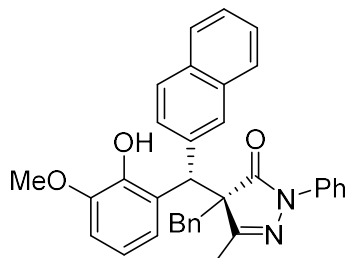

Compound was isolated as white solid (95% yield) after flash column chromatography on silica-gel.  $^1H$  NMR (500 MHz,  $CDCl_3$ )  $\delta$  7.83 (s, 1H), 7.78 – 7.74 (m, 1H), 7.73 – 7.67 (m, 2H), 7.63 (dd,  $J$  = 8.1, 1.2 Hz, 1H), 7.54 (dd,  $J$  = 8.6, 1.9 Hz, 1H), 7.50 (dd,  $J$  = 8.6, 1.1 Hz, 2H), 7.43 (dt,  $J$  = 6.2, 3.4 Hz, 2H), 7.36 – 7.31 (m, 2H), 7.19 – 7.13 (m, 6H), 6.91 (t,  $J$  = 8.1 Hz, 1H), 6.80 (dd,  $J$  = 8.1, 1.4 Hz, 1H), 6.18 (s, 1H), 5.38 (s, 1H), 3.88 (s, 3H), 3.45 (d,  $J$  = 13.4 Hz, 1H), 3.27 (d,  $J$  = 13.6 Hz, 1H), 2.22 (s, 3H).  $^{13}C$  NMR (126 MHz,  $CDCl_3$ )  $\delta$  174.43, 161.68, 146.20, 143.65, 137.47, 136.97, 134.77, 133.29, 132.45, 129.26, 128.58, 128.17, 128.12, 127.92, 127.40, 127.25, 127.10, 127.09, 126.02, 125.83, 125.31, 124.25, 124.06, 120.14, 119.18, 109.33, 63.50, 55.97, 46.91, 40.99, 15.18.  $[\alpha]_D^{25}$  = -75 ( $c$  = 1.0 in  $CH_2Cl_2$ ). The enantiomers were analyzed by HPLC using Daicel Chiralpak IA column at 254 nm (n-hexane/*i*-PrOH = 90/10), 1.0 mL/min; Major enantiomer:  $t_R$  = 29.37 min, minor enantiomer:  $t_R$  = 32.88 min. 94:6 *dr*, 99% *ee*. HRMS (ESI) calcd for  $C_{35}H_{30}N_2O_3Na$   $m/z$   $[M + Na]^+$ : 549.2153, found: 549.2148.

**(*R*)-4-benzyl-4-((*S*)-1-(2-hydroxy-3-methoxyphenyl)-3-phenylprop-2-yn-1-yl)-5-methyl-2-phenyl-2,4-dihydro-3H-pyrazol-3-one (3za)**

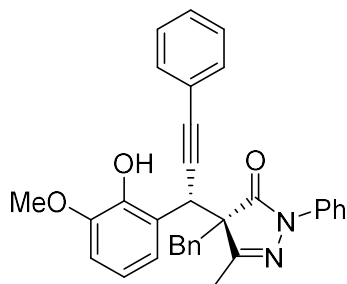

Compound was isolated as a colorless oil (78% yield) after flash column chromatography on silica-gel.  $^1H$  NMR (500 MHz,  $CDCl_3$ )  $\delta$  7.50 (d,  $J$  = 7.7 Hz, 2H), 7.40 – 7.37 (m, 2H), 7.30 – 7.27 (m, 5H), 7.23 – 7.16 (m, 7H), 6.89 (t,  $J$  = 8.0 Hz, 1H), 6.80 (dd,  $J$  = 8.0, 1.4 Hz, 1H), 6.17 (s, 1H), 5.03 (s, 1H), 3.86 (s, 3H), 3.52 (d,  $J$  = 13.7 Hz, 1H), 3.35 (d,  $J$  = 13.7 Hz, 1H), 2.51 (s, 3H).  $^{13}C$  NMR (126 MHz,  $CDCl_3$ )  $\delta$  173.21, 160.71, 146.69, 143.35, 137.42, 134.90, 131.63, 129.20, 128.51, 128.28, 128.24, 128.21, 127.15, 125.11, 122.82, 122.75, 121.53, 119.77, 119.53, 110.35, 86.75, 84.53, 63.96, 56.06, 39.20, 35.43, 15.88.  $[\alpha]_D^{25}$  = -47 ( $c$  = 1.0 in  $CH_2Cl_2$ ). The enantiomers were analyzed by HPLC using Daicel Chiralpak ID column at 254 nm (n-hexane/*i*-PrOH = 60/40), 0.7 mL/min; Major enantiomer:  $t_R$  = 14.92 min, minor enantiomer:  $t_R$  = 42.04 min. 80:20 *dr*, 86% *ee*. HRMS (ESI) calcd for  $C_{37}H_{30}N_2O_3Na$   $m/z$   $[M + Na]^+$ : 573.2149, found: 573.2140.

**(R)-4-benzyl-4-((S)-1-(2-hydroxy-3-methoxyphenyl)ethyl)-5-methyl-2-phenyl-2,4-dihydro-3H-pyrazol-3-one (3Aa)**

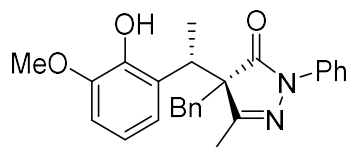

Compound was isolated as a colorless oil (40% yield) after flash column chromatography on silica-gel. <sup>1</sup>H NMR (500 MHz, CDCl<sub>3</sub>) δ 7.64 (d, *J* = 8.6 Hz, 2H), 7.35 – 7.32 (m, 3H), 7.17 – 7.13 (m, 5H), 7.06 – 7.02 (m, 2H), 6.95 (t, *J* = 8.0 Hz, 1H), 6.13 (s, 1H), 3.92 (s, 3H), 3.91 (q, *J* = 8.0 Hz, 1H), 3.12 (d, *J* = 13.7 Hz, 1H), 2.98 (d, *J* = 13.7 Hz, 1H), 2.30 (s, 3H), 1.25 (d, *J* = 7.3 Hz, 3H). <sup>13</sup>C NMR (126 MHz, CDCl<sub>3</sub>) δ 174.36, 162.29, 146.19, 143.73, 137.65, 135.52, 128.99, 128.60, 128.14, 127.04, 126.90, 125.02, 122.74, 119.56, 119.34, 109.27, 64.19, 56.02, 38.99, 16.07, 14.87, 14.65. [ $\alpha$ ]<sub>D</sub><sup>25</sup> = 94 (*c* = 1.0 in CH<sub>2</sub>Cl<sub>2</sub>). The enantiomers were analyzed by HPLC using Daicel Chiralpak ID column at 254 nm (n-hexane/*i*-PrOH = 80/20), 1.0 mL/min; Major enantiomer: *t*<sub>R</sub> = 20.56 min, minor enantiomer: *t*<sub>R</sub> = 13.33 min. 60:40 *dr*, 90% *ee*. HRMS (ESI) calcd for C<sub>26</sub>H<sub>26</sub>N<sub>2</sub>O<sub>3</sub>Na *m/z* [*M* + Na]<sup>+</sup>: 437.1836, found: 437.1828.

**(R)-4-benzyl-4-((S)-2-hydroxy-3-methoxyphenyl)(phenyl)methyl)-5-methyl-2-(p-tolyl)-2,4-dihydro-3H-pyrazol-3-one (3ab)**

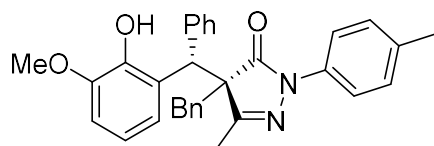

Compound was isolated as a white solid (85% yield) after flash column chromatography on silica-gel. <sup>1</sup>H NMR (500 MHz, CDCl<sub>3</sub>) δ 7.68 (dd, *J* = 8.2, 1.3 Hz, 1H), 7.42 – 7.38 (m, 2H), 7.30 (d, *J* = 8.4 Hz, 2H), 7.22 (t, *J* = 7.4 Hz, 2H), 7.19 – 7.16 (m, 1H), 7.15 – 7.08 (m, 7H), 6.90 (t, *J* = 8.1 Hz, 1H), 6.80 (dd, *J* = 8.1, 1.3 Hz, 1H), 5.16 (s, 1H), 3.89 (s, 3H), 3.39 (d, *J* = 13.5 Hz, 1H), 3.11 (d, *J* = 13.6 Hz, 1H), 2.32 (s, 3H), 2.20 (s, 3H). <sup>13</sup>C NMR (126 MHz, CDCl<sub>3</sub>) δ 174.29, 161.45, 146.24, 143.66, 139.26, 135.04, 135.00, 134.97, 129.24, 129.12, 128.84, 128.47, 128.13, 127.20, 127.06, 124.48, 123.96, 120.25, 119.18, 109.27, 63.65, 55.99, 46.75, 40.76, 20.98, 15.15. [ $\alpha$ ]<sub>D</sub><sup>25</sup> = 34 (*c* = 1.0 in CH<sub>2</sub>Cl<sub>2</sub>). The enantiomers were analyzed by HPLC using Daicel Chiralpak ID column at 254 nm (n-hexane/*i*-PrOH = 90/10), 1.0 mL/min; Major enantiomer: *t*<sub>R</sub> = 26.31 min, minor enantiomer: *t*<sub>R</sub> = 52.49 min. 97:3 *dr*, 97% *ee*. HRMS (ESI) calcd for C<sub>32</sub>H<sub>30</sub>N<sub>2</sub>O<sub>3</sub>Na *m/z* [*M* + Na]<sup>+</sup>: 513.2149, found: 513.2139.

**(R)-4-benzyl-2-(2-ethylphenyl)-4-((S)-2-hydroxy-3-methoxyphenyl)(phenyl)methyl)-5-methyl-2,4-dihydro-3H-pyrazol-3-one (3ac)**

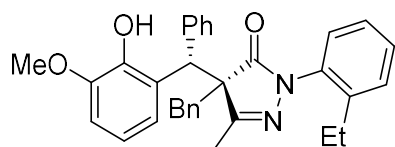

Compound was isolated as a colorless oil (77% yield) after flash column chromatography on silica-gel. <sup>1</sup>H NMR (500 MHz, CDCl<sub>3</sub>) δ 7.95 (d, *J* = 8.1 Hz, 1H), 7.54 – 7.48 (m, 2H), 7.29 (t, *J* = 7.4 Hz, 2H), 7.26 – 7.22 (m, 4H), 7.21 – 7.16 (m, 4H), 7.03 (td, *J* = 7.5, 1.9 Hz, 1H), 6.94 (t, *J* = 8.1 Hz, 1H), 6.82 (dd, *J* = 8.1, 1.3 Hz, 1H), 6.29 (dd, *J* = 7.9, 1.2 Hz, 1H), 6.26 (s, 1H), 5.18 (s, 1H), 3.89 (s, 3H), 3.44 (d, *J* = 13.5 Hz, 1H), 3.03 (d, *J* = 13.5 Hz, 1H), 2.38 (s, 3H), 1.87 (qd, *J* =

7.6, 4.4 Hz, 2H), 0.94 (t,  $J = 7.6$  Hz, 3H).  $^{13}\text{C}$  NMR (126 MHz,  $\text{CDCl}_3$ )  $\delta$  174.82, 160.90, 146.50, 143.85, 141.09, 138.87, 135.13, 135.08, 129.85, 129.49, 128.46, 128.37, 128.35, 128.34, 127.24, 127.14, 126.55, 125.92, 124.90, 123.89, 119.35, 109.36, 63.58, 56.00, 46.75, 40.40, 23.27, 15.51, 14.07.  $[\alpha]_{\text{D}}^{25} = 55$  ( $c = 1.0$  in  $\text{CH}_2\text{Cl}_2$ ). The enantiomers were analyzed by HPLC using Daicel Chiralpak IC column at 254 nm (n-hexane/*i*-PrOH = 90/10), 1.0 mL/min; Major enantiomer:  $t_{\text{R}} = 16.39$  min, minor enantiomer:  $t_{\text{R}} = 21.40$ . 97:3 *dr*, 99% *ee*. HRMS (ESI) calcd for  $\text{C}_{33}\text{H}_{32}\text{N}_2\text{O}_3\text{Na}$   $m/z$   $[\text{M} + \text{Na}]^+$ : 527.2305, found: 527.2297.

**(*R*)-4-benzyl-4-((*S*)-(2-hydroxy-3-methoxyphenyl)(phenyl)methyl)-2-(4-methoxyphenyl)-5-methyl-2,4-dihydro-3H-pyrazol-3-one (3ad)**

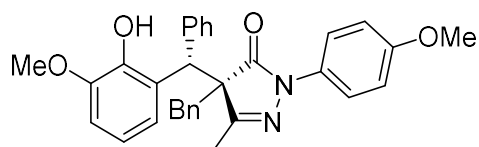

Compound was isolated as a white solid (93% yield) after flash column chromatography on silica-gel.  $^1\text{H}$  NMR (500 MHz,  $\text{CDCl}_3$ )  $\delta$  7.71 (d,  $J = 8.1$  Hz, 1H), 7.44 – 7.39 (m, 2H), 7.28 – 7.21 (m, 4H), 7.21 – 7.10 (m, 6H), 6.91 (t,  $J = 8.1$  Hz, 1H), 6.85 – 6.82 (m, 2H), 6.80 (dd,  $J = 8.1, 1.2$  Hz, 1H), 5.17 (s, 1H), 3.88 (s, 3H), 3.78 (s, 3H), 3.11 (d,  $J = 13.5$  Hz, 1H), 2.21 (s, 3H).  $^{13}\text{C}$  NMR (126 MHz,  $\text{CDCl}_3$ )  $\delta$  174.22, 161.41, 157.36, 146.28, 143.69, 139.27, 135.01, 130.71, 129.29, 128.88, 128.46, 128.14, 127.22, 127.08, 124.51, 123.94, 122.28, 119.19, 113.84, 109.29, 63.59, 55.99, 55.43, 46.71, 40.69, 15.15.  $[\alpha]_{\text{D}}^{25} = 36$  ( $c = 1.0$  in  $\text{CH}_2\text{Cl}_2$ ). The enantiomers were analyzed by HPLC using Daicel Chiralpak IC column at 254 nm (n-hexane/*i*-PrOH = 90/10), 1.0 mL/min; Major enantiomer:  $t_{\text{R}} = 25.55$  min, minor enantiomer:  $t_{\text{R}} = 41.21$ . 97:3 *dr*, 99% *ee*. HRMS (ESI) calcd for  $\text{C}_{32}\text{H}_{30}\text{N}_2\text{O}_4\text{Na}$   $m/z$   $[\text{M} + \text{Na}]^+$ : 529.2098, found: 529.2091.

**(*R*)-4-benzyl-2-(3-bromophenyl)-4-((*S*)-(2-hydroxy-3-methoxyphenyl)(phenyl)methyl)-5-methyl-2,4-dihydro-3H-pyrazol-3-one (3ae)**

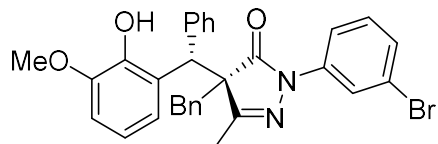

Compound was isolated as a colorless oil (78% yield) after flash column chromatography on silica-gel.  $^1\text{H}$  NMR (500 MHz,  $\text{CDCl}_3$ )  $\delta$  7.70 (t,  $J = 1.9$  Hz, 1H), 7.60 (d,  $J = 8.1$  Hz, 1H), 7.52 (ddd,  $J = 8.2, 2.1, 1.0$  Hz, 1H), 7.38 – 7.34 (m, 2H), 7.27 – 7.15 (m, 5H), 7.14 – 7.11 (m, 3H), 7.06 (dd,  $J = 7.2, 2.3$  Hz, 2H), 6.91 (t,  $J = 8.1$  Hz, 1H), 6.81 (dd,  $J = 8.1, 1.3$  Hz, 1H), 6.08 (s, 1H), 5.17 (s, 1H), 3.89 (s, 3H), 3.37 (d,  $J = 13.6$  Hz, 1H), 3.14 (d,  $J = 13.6$  Hz, 1H), 2.21 (s, 3H).  $^{13}\text{C}$  NMR (126 MHz,  $\text{CDCl}_3$ )  $\delta$  174.53, 162.10, 146.21, 143.61, 139.06, 138.60, 134.65, 129.86, 129.12, 128.72, 128.53, 128.17, 127.95, 127.30, 127.18, 124.18, 123.72, 122.30, 122.20, 119.19, 117.85, 109.30, 63.94, 55.99, 46.64, 40.86, 15.17.  $[\alpha]_{\text{D}}^{25} = 27$  ( $c = 1.0$  in  $\text{CH}_2\text{Cl}_2$ ). The enantiomers were analyzed by HPLC using Daicel Chiralpak ID column at 254 nm (n-hexane/*i*-PrOH = 90/10), 1.0 mL/min; Major enantiomer:  $t_{\text{R}} = 21.93$  min, minor enantiomer:  $t_{\text{R}} = 75.67$  min. 96:4 *dr*, 99% *ee*. HRMS (ESI) calcd for  $\text{C}_{31}\text{H}_{27}\text{BrN}_2\text{O}_3\text{Na}$   $m/z$   $[\text{M} + \text{Na}]^+$ : 577.1097, found: 577.1090.

**(*R*)-4-benzyl-2-(4-bromophenyl)-4-((*S*)-(2-hydroxy-3-methoxyphenyl)(phenyl)methyl)-5-methyl-2,4-dihydro-3H-pyrazol-3-one (3af)**

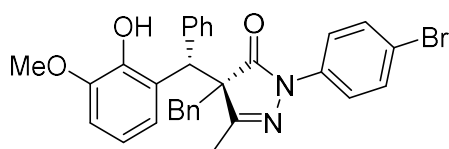

Compound was isolated as a white solid (85% yield) after flash column chromatography on silica-gel.  $^1\text{H}$  NMR (500 MHz,  $\text{CDCl}_3$ )  $\delta$  7.61 (d,  $J$  = 8.1 Hz, 1H), 7.41 (s, 4H), 7.37 – 7.34 (m, 2H), 7.24 – 7.16 (m, 3H), 7.12 (dd,  $J$  = 5.2, 1.9 Hz, 3H), 7.07 – 7.04 (m, 2H), 6.90 (t,  $J$  = 8.1 Hz, 1H), 6.80 (dd,  $J$  = 8.1, 1.4 Hz, 1H), 6.08 (s, 1H), 5.16 (s, 1H), 3.89 (s, 3H), 3.37 (d,  $J$  = 13.5 Hz, 1H), 3.13 (d,  $J$  = 13.6 Hz, 1H), 2.20 (s, 3H).  $^{13}\text{C}$  NMR (126 MHz,  $\text{CDCl}_3$ )  $\delta$  174.44, 162.05, 146.23, 143.64, 139.09, 136.54, 134.73, 131.57, 129.14, 128.76, 128.52, 128.16, 127.30, 127.16, 124.23, 123.73, 121.08, 119.20, 118.03, 109.31, 63.92, 56.00, 46.66, 40.82, 15.19.  $[\alpha]_{\text{D}}^{25}$  = 40 ( $c$  = 1.0 in  $\text{CH}_2\text{Cl}_2$ ). The enantiomers were analyzed by HPLC using Daicel Chiralpak IA column at 254 nm (n-hexane/i-PrOH = 90/10), 0.7 mL/min; Major enantiomer:  $t_{\text{R}}$  = 10.36 min, minor enantiomer:  $t_{\text{R}}$  = 9.70 min. 89:11 *dr*, 98% *ee*. HRMS (ESI) calcd for  $\text{C}_{31}\text{H}_{27}\text{BrN}_2\text{O}_3\text{Na}$   $m/z$   $[\text{M} + \text{Na}]^+$ : 577.1097, found: 577.1094.

**(*R*)-4-benzyl-4-((*S*)-(2-hydroxy-3-methoxyphenyl)(phenyl)methyl)-5-methyl-2-(perfluorophenyl)-2,4-dihydro-3H-pyrazol-3-one (3ag)**

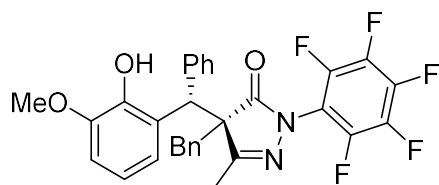

Compound was isolated as white solid (95% yield) after flash column chromatography on silica-gel.  $^1\text{H}$  NMR (500 MHz,  $\text{CDCl}_3$ )  $\delta$  7.68 (dd,  $J$  = 8.2, 1.3 Hz, 1H), 7.42 – 7.38 (m, 2H), 7.30 (d,  $J$  = 8.4 Hz, 2H), 7.22 (t,  $J$  = 7.4 Hz, 2H), 7.19 – 7.16 (m, 1H), 7.15 – 7.08 (m, 7H), 6.90 (t,  $J$  = 8.1 Hz, 1H), 6.80 (dd,  $J$  = 8.1, 1.3 Hz, 1H), 5.16 (s, 1H), 3.89 (s, 3H), 3.39 (d,  $J$  = 13.5 Hz, 1H), 3.11 (d,  $J$  = 13.6 Hz, 1H), 2.32 (s, 3H), 2.20 (s, 3H).  $^{13}\text{C}$  NMR (126 MHz,  $\text{CDCl}_3$ )  $\delta$  174.74, 163.37, 146.23, 144.64 – 144.43 (m), 143.63, 142.54 – 142.34 (m), 140.27 – 140.00 (m), 138.80 – 138.56 (m), 138.59, 136.88 – 136.45 (m), 134.13, 129.36, 128.84, 128.62, 128.38, 124.08, 123.54, 119.39, 111.91 – 111.53 (m), 109.37, 62.74, 55.97, 46.66, 40.78, 15.35.  $[\alpha]_{\text{D}}^{25}$  = 1 ( $c$  = 1.0 in  $\text{CH}_2\text{Cl}_2$ ). The enantiomers were analyzed by HPLC using Daicel Chiralpak ID column at 254 nm (n-hexane/i-PrOH = 90/10), 1.0 mL/min; Major enantiomer:  $t_{\text{R}}$  = 10.46 min, minor enantiomer:  $t_{\text{R}}$  = 37.30 min. 99:1 *dr*, 99% *ee*. HRMS (ESI) calcd for  $\text{C}_{31}\text{H}_{23}\text{F}_5\text{N}_2\text{O}_3\text{Na}$   $m/z$   $[\text{M} + \text{Na}]^+$ : 589.1521, found: 589.1511.

**(*R*)-4-benzyl-4-((*S*)-(2-hydroxy-3-methoxyphenyl)(phenyl)methyl)-5-methyl-2-(naphthalen-2-yl)-2,4-dihydro-3H-pyrazol-3-one (3ah)**

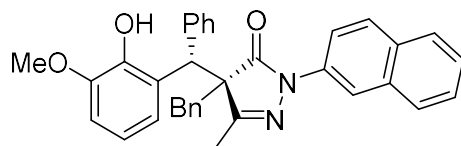

Compound was isolated as a white solid (94% yield) after flash column chromatography on silica-gel.  $^1\text{H}$  NMR (500 MHz,  $\text{CDCl}_3$ )  $\delta$  8.05 (d,  $J$  = 2.0 Hz, 1H), 7.84 – 7.78 (m, 3H), 7.73 – 7.67 (m, 2H), 7.45 (dd,  $J$  = 7.9, 1.5 Hz, 4H), 7.26 – 7.21 (m, 2H), 7.20 – 7.16 (m, 1H), 7.16 – 7.11 (m, 5H), 6.95 (t,  $J$  = 8.1 Hz, 1H), 6.82 (dd,  $J$  = 8.0, 1.3 Hz, 1H), 6.17 (s, 1H), 5.24 (s, 1H), 3.89 (s, 3H),

3.46 (d,  $J = 13.5$  Hz, 1H), 3.19 (d,  $J = 13.6$  Hz, 1H), 2.27 (s, 3H).  $^{13}\text{C}$  NMR (126 MHz,  $\text{CDCl}_3$ )  $\delta$  174.69, 161.92, 146.27, 143.70, 139.27, 135.14, 134.91, 133.41, 131.15, 129.24, 128.85, 128.56, 128.38, 128.21, 127.99, 127.55, 127.29, 127.15, 126.25, 125.31, 124.42, 123.92, 119.25, 117.02, 109.33, 63.93, 56.01, 46.81, 40.94, 15.25.  $[\alpha]_{\text{D}}^{25} = 53$  ( $c = 1.0$  in  $\text{CH}_2\text{Cl}_2$ ). The enantiomers were analyzed by HPLC using Daicel Chiralpak IC column at 254 nm (n-hexane/i-PrOH = 90/10), 1.0 mL/min; Major enantiomer:  $t_{\text{R}} = 9.75$  min, minor enantiomer:  $t_{\text{R}} = 17.67$  min. 95:5 *dr*, 99% *ee*. HRMS (ESI) calcd for  $\text{C}_{35}\text{H}_{30}\text{N}_2\text{O}_3\text{Na}$   $m/z$   $[\text{M} + \text{Na}]^+$ : 549.2149, found: 549.2135.

**(*R*)-4-benzyl-5-ethyl-4-((*S*)-(2-hydroxy-3-methoxyphenyl)(phenyl)methyl)-2-phenyl-2,4-dihydro-3H-pyrazol-3-one (3ai)**

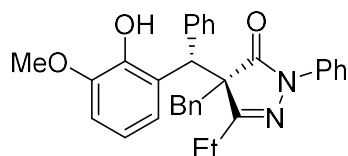

Compound was isolated as a colorless oil (89% yield) after flash column chromatography on silica-gel.  $^1\text{H}$  NMR (500 MHz,  $\text{CDCl}_3$ )  $\delta$  7.64 (dd,  $J = 8.2, 1.3$  Hz, 1H), 7.56 – 7.49 (m, 2H), 7.41 – 7.36 (m, 2H), 7.35 – 7.30 (m, 2H), 7.24 – 7.19 (m, 2H), 7.19 – 7.11 (m, 5H), 7.08 (dd,  $J = 7.4, 2.1$  Hz, 2H), 6.91 (t,  $J = 8.1$  Hz, 1H), 6.80 (dd,  $J = 8.0, 1.4$  Hz, 1H), 6.15 (s, 1H), 5.20 (s, 1H), 3.89 (s, 3H), 3.38 (d,  $J = 13.6$  Hz, 1H), 3.16 (d,  $J = 13.6$  Hz, 1H), 2.60 (q,  $J = 7.3$  Hz, 2H), 1.10 (t,  $J = 7.3$  Hz, 3H).  $^{13}\text{C}$  NMR (126 MHz,  $\text{CDCl}_3$ )  $\delta$  174.77, 165.33, 146.19, 143.64, 139.48, 137.70, 135.00, 129.20, 128.74, 128.51, 128.43, 128.06, 127.11, 127.01, 125.15, 124.55, 124.05, 120.09, 119.13, 109.22, 63.70, 55.96, 46.78, 41.12, 22.04, 8.60.  $[\alpha]_{\text{D}}^{25} = 32$  ( $c = 1.0$  in  $\text{CH}_2\text{Cl}_2$ ). The enantiomers were analyzed by HPLC using Daicel Chiralpak IC column at 254 nm (n-hexane/i-PrOH = 90/10), 1.0 mL/min; Major enantiomer:  $t_{\text{R}} = 9.16$  min, minor enantiomer:  $t_{\text{R}} = 15.1$  min. 98:2 *dr*, 99% *ee*. HRMS (ESI) calcd for  $\text{C}_{32}\text{H}_{30}\text{N}_2\text{O}_3\text{Na}$   $m/z$   $[\text{M} + \text{Na}]^+$ : 513.2149, found: 513.2135.

**(*R*)-4-benzyl-4-((*S*)-(2-hydroxy-3-methoxyphenyl)(phenyl)methyl)-5-isopropyl-2-phenyl-2,4-dihydro-3H-pyrazol-3-one (3aj)**

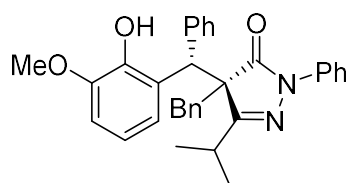

Compound was isolated as a colorless oil (85% yield) after flash column chromatography on silica-gel.  $^1\text{H}$  NMR (500 MHz,  $\text{CDCl}_3$ )  $\delta$  7.65 (d,  $J = 7.8$  Hz, 2H), 7.40 – 7.34 (m, 3H), 7.28 (d,  $J = 7.2$  Hz, 2H), 7.22 – 7.14 (m, 4H), 7.13 – 7.07 (m, 5H), 6.88 (t,  $J = 8.0$  Hz, 1H), 6.80 (dd,  $J = 8.0, 1.4$  Hz, 1H), 6.29 (s, 1H), 5.38 (s, 1H), 3.34 (d,  $J = 14.0$  Hz, 1H), 3.30 (d,  $J = 14.0$  Hz, 1H), 2.93 (hept,  $J = 6.9$  Hz, 1H), 1.15 (d,  $J = 6.8$  Hz, 3H), 1.06 (d,  $J = 6.8$  Hz, 3H).  $^{13}\text{C}$  NMR (126 MHz,  $\text{CDCl}_3$ )  $\delta$  174.77, 169.16, 146.09, 143.59, 140.61, 137.83, 135.17, 129.37, 128.61, 128.46, 128.28, 127.95, 126.95, 126.82, 125.34, 125.13, 124.99, 119.92, 119.07, 109.11, 62.94, 56.00, 46.36, 41.33, 28.43, 21.90, 21.26.  $[\alpha]_{\text{D}}^{25} = -44$  ( $c = 1.0$  in  $\text{CH}_2\text{Cl}_2$ ). The enantiomers were analyzed by HPLC using Daicel Chiralpak IA column at 254 nm (n-hexane/i-PrOH = 90/10), 1.0 mL/min; Major enantiomer:  $t_{\text{R}} = 25.58$  min, minor enantiomer:  $t_{\text{R}} = 54.29$  min. 97:3 *dr*, 99% *ee*. HRMS (ESI) calcd for  $\text{C}_{33}\text{H}_{32}\text{N}_2\text{O}_3\text{Na}$   $m/z$   $[\text{M} + \text{Na}]^+$ : 527.2305, found: 527.2293.

**(R)-4-benzyl-4-((S)-(2-hydroxy-3-methoxyphenyl)(phenyl)methyl)-2,5-diphenyl-2,4-dihydro-3H-pyrazol-3-one (3ak)**

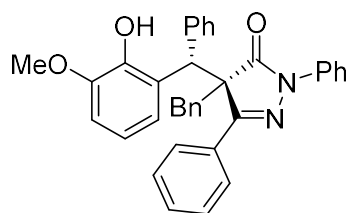

Compound was isolated as a colorless oil (82% yield) after flash column chromatography on silica-gel. <sup>1</sup>H NMR (500 MHz, CDCl<sub>3</sub>) δ 8.13 (dd, *J* = 6.6, 3.2 Hz, 2H), 7.92 (d, *J* = 8.0 Hz, 1H), 7.52 (dd, *J* = 5.0, 1.9 Hz, 3H), 7.49 (dt, *J* = 8.6, 1.6 Hz, 2H), 7.36 – 7.32 (m, 2H), 7.22 – 7.18 (m, 3H), 7.07 (dd, *J* = 5.1, 1.9 Hz, 3H), 7.03 – 6.97 (m, 6H), 6.86 (dd, *J* = 8.1, 1.2 Hz, 1H), 6.33 (s, 1H), 5.79 (s, 1H), 3.92 (s, 3H), 3.69 (d, *J* = 13.7 Hz, 1H), 3.53 (d, *J* = 13.7 Hz, 1H). <sup>13</sup>C NMR (126 MHz, CDCl<sub>3</sub>) δ 175.11, 159.13, 146.32, 144.04, 138.72, 137.36, 134.94, 131.69, 129.98, 129.42, 129.06, 128.67, 128.54, 128.05, 127.88, 127.04, 127.03, 126.88, 125.59, 124.59, 124.30, 120.49, 119.20, 109.40, 64.06, 56.03, 46.58, 41.29. [α]<sub>D</sub><sup>25</sup> = -44 (c = 1.0 in CH<sub>2</sub>Cl<sub>2</sub>). The enantiomers were analyzed by HPLC using Daicel Chiralpak ID column at 254 nm (n-hexane/*i*-PrOH = 90/10), 1.0 mL/min; Major enantiomer: t<sub>R</sub> = 12.82 min, minor enantiomer: t<sub>R</sub> = 50.62 min. 93:7 *dr*, 99% *ee*. HRMS (ESI) calcd for C<sub>36</sub>H<sub>30</sub>N<sub>2</sub>O<sub>3</sub>Na *m/z* [M + Na]<sup>+</sup>: 561.2149, found: 561.2141.

**(R)-4-benzyl-4-((S)-(2-hydroxy-3-methoxyphenyl)(phenyl)methyl)-5-(4-methoxyphenyl)-2-phenyl-2,4-dihydro-3H-pyrazol-3-one (3al)**

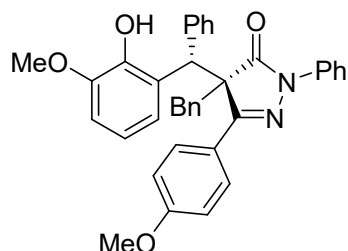

Compound was isolated as a colorless oil (82% yield) after flash column chromatography on silica-gel. <sup>1</sup>H NMR (500 MHz, CDCl<sub>3</sub>) δ 8.10 – 8.07 (m, 2H), 7.97 – 7.91 (m, 1H), 7.51 – 7.46 (m, 2H), 7.35 – 7.31 (m, 2H), 7.23 – 7.20 (m, 2H), 7.19 – 7.15 (m, 1H), 7.08 (dt, *J* = 4.8, 1.7 Hz, 3H), 7.06 – 7.03 (m, 3H), 7.03 – 6.96 (m, 6H), 6.85 (dd, *J* = 8.1, 1.3 Hz, 1H), 6.37 (s, 1H), 5.76 (s, 1H), 3.93 (s, 3H), 3.91 (s, 3H), 3.63 (d, *J* = 13.7 Hz, 1H), 3.51 (d, *J* = 13.7 Hz, 1H). <sup>13</sup>C NMR (126 MHz, CDCl<sub>3</sub>) δ 174.96, 160.91, 158.93, 146.33, 144.04, 138.76, 137.43, 135.04, 129.43, 129.10, 128.69, 128.62, 128.50, 128.03, 127.85, 127.00, 126.83, 125.45, 124.63, 124.39, 124.36, 120.44, 114.08, 109.39, 64.01, 56.02, 55.32, 46.72, 41.21. [α]<sub>D</sub><sup>25</sup> = -52 (c = 1.0 in CH<sub>2</sub>Cl<sub>2</sub>). The enantiomers were analyzed by HPLC using Daicel Chiralpak IA column at 254nm (n-hexane/*i*-PrOH = 90/10), 1.0 mL/min; Major enantiomer: t<sub>R</sub> = 19.96 min, minor enantiomer: t<sub>R</sub> = 35.47 min. 95:5 *dr*, 99% *ee*. HRMS (ESI) calcd for C<sub>37</sub>H<sub>32</sub>N<sub>2</sub>O<sub>4</sub>Na *m/z* [M+Na]<sup>+</sup>: 591.2254, found: 591.2250.

**(R)-4-benzyl-5-(4-fluorophenyl)-4-((S)-(2-hydroxy-3-methoxyphenyl)(phenyl)methyl)-2-phenyl-2,4-dihydro-3H-pyrazol-3-one (3am)**

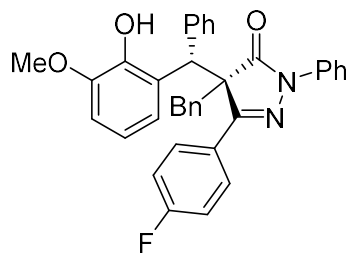

Compound was isolated as a colorless oil (79% yield) after flash column chromatography on silica-gel.  $^1\text{H}$  NMR (500 MHz,  $\text{CDCl}_3$ )  $\delta$  8.13 – 8.09 (m, 2H), 7.88 (d,  $J$  = 8.1 Hz, 1H), 7.51 – 7.46 (m, 2H), 7.36 – 7.32 (m, 2H), 7.24 – 7.18 (m, 5H), 7.09 (dd,  $J$  = 5.1, 1.9 Hz, 3H), 7.06 – 6.98 (m, 6H), 6.86 (dd,  $J$  = 8.1, 1.3 Hz, 1H), 6.28 (s, 1H), 5.72 (s, 1H), 3.92 (s, 3H), 3.64 (d,  $J$  = 13.7 Hz, 1H), 3.52 (d,  $J$  = 13.7 Hz, 1H).  $^{13}\text{C}$  NMR (126 MHz,  $\text{CDCl}_3$ )  $\delta$  174.90,  $\delta$  163.65 (d,  $J$  = 251.4 Hz), 158.21, 146.27, 143.94, 138.59, 137.29, 134.81, 129.32, 129.03, 129.03 (d,  $J$  = 8.2 Hz), 128.57, 128.12, 127.98 (d,  $J$  = 3.5 Hz), 127.94, 127.15, 126.96, 125.65, 124.43, 124.12, 120.44, 119.26, 115.82 (d,  $J$  = 21.9 Hz), 109.42, 63.89, 56.02, 46.53, 41.24.  $[\alpha]_{\text{D}}^{25}$  = -45 ( $c$  = 1.0 in  $\text{CH}_2\text{Cl}_2$ ). The enantiomers were analyzed by HPLC using Daicel Chiralpak IA column at 254 nm (n-hexane/*i*-PrOH = 90/10), 1.0 mL/min; Major enantiomer:  $t_{\text{R}}$  = 22.50 min, minor enantiomer:  $t_{\text{R}}$  = 29.53 min. 97:3 *dr*, 99% *ee*. HRMS (ESI) calcd for  $\text{C}_{36}\text{H}_{29}\text{FN}_2\text{O}_3\text{Na}$   $m/z$   $[\text{M}+\text{Na}]^+$ : 579.2054, found: 579.2044.

**(*R*)-4-((*S*)-(2-hydroxy-3-methoxyphenyl)(phenyl)methyl)-5-methyl-4-(2-methylbenzyl)-2-phenyl-2,4-dihydro-3H-pyrazol-3-one (3an)**

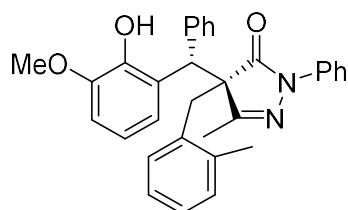

Compound was isolated as a colorless oil (84% yield) after flash column chromatography on silica-gel.  $^1\text{H}$  NMR (500 MHz,  $\text{CDCl}_3$ )  $\delta$  7.83 (d,  $J$  = 8.0 Hz, 1H), 7.46 – 7.40 (m, 4H), 7.34 – 7.29 (m, 2H), 7.21 (dd,  $J$  = 8.2, 6.4 Hz, 2H), 7.18 – 7.13 (m, 2H), 7.07 (d,  $J$  = 7.5 Hz, 1H), 7.03 (td,  $J$  = 7.5, 6.8, 2.5 Hz, 1H), 6.98 – 6.90 (m, 3H), 6.81 (dd,  $J$  = 8.0, 1.4 Hz, 1H), 6.13 (s, 1H), 5.18 (s, 1H), 3.89 (s, 3H), 3.45 (d,  $J$  = 14.5 Hz, 1H), 3.21 (d,  $J$  = 14.5 Hz, 1H), 2.29 (s, 3H), 2.19 (s, 3H).  $^{13}\text{C}$  NMR (126 MHz,  $\text{CDCl}_3$ )  $\delta$  174.78, 161.84, 146.11, 143.66, 139.00, 137.45, 136.52, 133.75, 130.48, 128.79, 128.58, 128.56, 128.39, 127.20, 126.88, 125.68, 125.27, 124.58, 123.88, 120.13, 119.19, 109.22, 63.26, 55.96, 46.86, 35.66, 20.04, 15.08.  $[\alpha]_{\text{D}}^{25}$  = -4 ( $c$  = 1.0 in  $\text{CH}_2\text{Cl}_2$ ). The enantiomers were analyzed by HPLC using Daicel Chiralpak AD-H column at 254 nm (n-hexane/*i*-PrOH = 90/10), 0.7 mL/min; Major enantiomer:  $t_{\text{R}}$  = 19.70 min, minor enantiomer:  $t_{\text{R}}$  = 43.00 min. 90:10 *dr*, 99% *ee*. HRMS (ESI) calcd for  $\text{C}_{32}\text{H}_{30}\text{N}_2\text{O}_3\text{Na}$   $m/z$   $[\text{M}+\text{Na}]^+$ : 513.2149, found: 513.2151.

**(*R*)-4-((*S*)-(2-hydroxy-3-methoxyphenyl)(phenyl)methyl)-5-methyl-4-(4-methylbenzyl)-2-phenyl-2,4-dihydro-3H-pyrazol-3-one (3ao)**

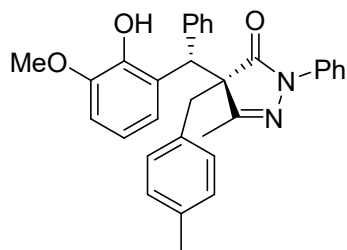

Compound was isolated as a colorless oil (95% yield) after flash column chromatography on silica-gel.  $^1\text{H}$  NMR (500 MHz,  $\text{CDCl}_3$ )  $\delta$  7.67 (dd,  $J$  = 8.1, 1.4 Hz, 1H), 7.47 (dd,  $J$  = 8.6, 1.2 Hz, 2H), 7.43 – 7.38 (m, 2H), 7.35 – 7.30 (m, 2H), 7.25 – 7.20 (m, 2H), 7.19 – 7.14 (m, 2H), 6.99 (d,  $J$  = 8.1 Hz, 2H), 7.00 – 6.89 (m, 3H), 6.80 (dd,  $J$  = 8.0, 1.4 Hz, 1H), 6.15 (s, 1H), 5.17 (s, 1H), 3.88 (s, 3H), 3.37 (d,  $J$  = 13.6 Hz, 1H), 3.10 (d,  $J$  = 13.6 Hz, 1H), 2.21 (s, 3H), 2.21 (s, 3H).  $^{13}\text{C}$  NMR (126 MHz,  $\text{CDCl}_3$ )  $\delta$  174.54, 161.78, 146.17, 143.59, 139.20, 137.44, 136.53, 131.72, 128.99, 128.82, 128.77, 128.52, 128.43, 127.16, 125.23, 124.38, 123.82, 120.10, 119.12, 109.19, 63.75, 55.92, 46.71, 40.36, 20.93, 15.15.  $[\alpha]_{\text{D}}^{25}$  = 39 ( $c$  = 1.0 in  $\text{CH}_2\text{Cl}_2$ ). The enantiomers were analyzed by HPLC using Daicel Chiralpak IC column at 254 nm (n-hexane/*i*-PrOH = 90/10), 0.7 mL/min; Major enantiomer:  $t_{\text{R}}$  = 19.16 min, minor enantiomer:  $t_{\text{R}}$  = 37.45 min. 98:2 *dr*, 99% *ee*. HRMS (ESI) calcd for  $\text{C}_{32}\text{H}_{30}\text{N}_2\text{O}_3\text{Na}$   $m/z$   $[\text{M}+\text{Na}]^+$ : 513.2149, found: 513.2148.

**(R)-4-(2-fluorobenzyl)-4-((S)-(2-hydroxy-3-methoxyphenyl)(phenyl)methyl)-5-methyl-2-phenyl-2,4-dihydro-3H-pyrazol-3-one (3ap)**

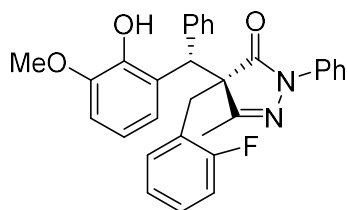

Compound was isolated as a colorless oil (94% yield) after flash column chromatography on silica-gel.  $^1\text{H}$  NMR (500 MHz,  $\text{CDCl}_3$ )  $\delta$  7.64 (dd,  $J$  = 8.2, 1.4 Hz, 1H), 7.50 (dd,  $J$  = 8.6, 1.2 Hz, 2H), 7.42 – 7.37 (m, 2H), 7.35 – 7.30 (m, 2H), 7.22 (t,  $J$  = 7.3 Hz, 2H), 7.20 – 7.14 (m, 3H), 7.12 – 7.05 (m, 1H), 6.99 – 6.84 (m, 3H), 6.80 (dd,  $J$  = 8.1, 1.4 Hz, 1H), 6.17 (s, 1H), 5.22 (s, 1H), 3.89 (s, 3H), 3.54 (d,  $J$  = 13.8 Hz, 1H), 3.21 – 3.14 (m, 1H), 2.21 (s, 3H).  $^{13}\text{C}$  NMR (126 MHz,  $\text{CDCl}_3$ )  $\delta$  174.34,  $\delta$  160.78 (d,  $J$  = 244.7 Hz), 162.27, 146.17, 143.63, 139.18, 137.38, 131.64 (d,  $J$  = 3.9 Hz), 128.83 (d,  $J$  = 8.6 Hz), 128.66, 128.57, 128.51, 127.22, 124.02, 124.00 (d,  $J$  = 36.1 Hz), 123.83, 121.92 (d,  $J$  = 15.4 Hz), 119.95, 119.11, 115.09 (d,  $J$  = 23.1 Hz), 109.22, 63.17, 55.94, 46.56, 32.70, 14.47.  $[\alpha]_{\text{D}}^{25}$  = 9.0 ( $c$  = 1.0 in  $\text{CH}_2\text{Cl}_2$ ). The enantiomers were analyzed by HPLC using Daicel Chiralpak IC column at 254 nm (n-hexane/*i*-PrOH = 95/5), 0.7 mL/min; Major enantiomer:  $t_{\text{R}}$  = 18.42 min, minor enantiomer:  $t_{\text{R}}$  = 45.23 min. 98:2 *dr*, 99% *ee*. HRMS (ESI) calcd for  $\text{C}_{31}\text{H}_{27}\text{FN}_2\text{O}_3\text{Na}$   $m/z$   $[\text{M}+\text{Na}]^+$ : 517.1890, found: 517.1895.

**(R)-4-((S)-(2-hydroxy-3-methoxyphenyl)(phenyl)methyl)-4,5-dimethyl-2-phenyl-2,4-dihydro-3H-pyrazol-3-one (3aq)**

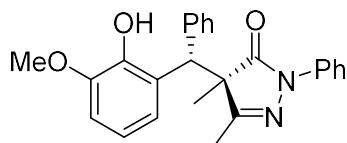

Compound was isolated as a colorless oil (81% yield) after flash column chromatography on silica-gel.  $^1\text{H}$  NMR (500 MHz,  $\text{CDCl}_3$ )  $\delta$  7.76 (dd,  $J = 8.7, 1.2$  Hz, 2H), 7.54 (dd,  $J = 8.0, 1.4$  Hz, 1H), 7.40 – 7.36 (m, 2H), 7.34 – 7.31 (m, 2H), 7.23 – 7.15 (m, 4H), 6.86 (t,  $J = 8.0$  Hz, 1H), 6.77 (dd,  $J = 8.1, 1.4$  Hz, 1H), 6.03 (s, 1H), 4.99 (s, 1H), 3.87 (s, 3H), 2.17 (s, 3H), 1.44 (s, 3H).  $^{13}\text{C}$  NMR (126 MHz,  $\text{CDCl}_3$ )  $\delta$  175.57, 164.04, 146.18, 143.58, 139.08, 137.91, 128.70, 128.35, 127.14, 125.01, 124.50, 123.27, 119.37, 119.05, 109.17, 57.40, 55.92, 46.73, 20.81, 14.23.  $[\alpha]_{\text{D}}^{25} = -100$  ( $c = 1.0$  in  $\text{CH}_2\text{Cl}_2$ ). The enantiomers were analyzed by HPLC using Daicel Chiralpak IA column at 254 nm (n-hexane/*i*-PrOH = 90/10), 0.7 mL/min; Major enantiomer:  $t_{\text{R}} = 21.43$  min, minor enantiomer:  $t_{\text{R}} = 23.25$  min. 92:8 *dr*, 97% *ee*. HRMS (ESI) calcd for  $\text{C}_{25}\text{H}_{24}\text{N}_2\text{O}_3\text{Na}$   $m/z$   $[\text{M}+\text{Na}]^+$ : 423.1679, found: 423.1677.

**(*R*)-4-ethyl-4-((*S*)-(2-hydroxy-3-methoxyphenyl)(phenyl)methyl)-5-methyl-2-phenyl-2,4-dihydro-3H-pyrazol-3-one (3ar)**

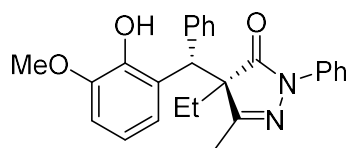

Compound was isolated as a colorless oil (85% yield) after flash column chromatography on silica-gel.  $^1\text{H}$  NMR (500 MHz,  $\text{CDCl}_3$ )  $\delta$  7.79 – 7.72 (m, 2H), 7.58 (dd,  $J = 8.1, 1.3$  Hz, 1H), 7.41 – 7.36 (m, 2H), 7.36 – 7.32 (m, 2H), 7.21 – 7.17 (m, 3H), 7.15 (dd,  $J = 8.4, 6.0$  Hz, 1H), 6.86 (t,  $J = 8.1$  Hz, 1H), 6.76 (dd,  $J = 8.0, 1.4$  Hz, 1H), 6.03 (s, 1H), 5.00 (s, 1H), 3.87 (s, 3H), 2.15 (s, 3H), 2.09 – 2.04 (dd,  $J = 14.0, 7.3$  Hz, 1H), 1.87 (dd,  $J = 14.0, 7.3$  Hz, 1H), 0.70 (t,  $J = 7.5$  Hz, 3H).  $^{13}\text{C}$  NMR (126 MHz,  $\text{CDCl}_3$ )  $\delta$  174.85, 162.46, 146.13, 143.56, 139.24, 137.74, 128.71, 128.69, 128.37, 127.12, 125.09, 124.58, 123.50, 119.50, 119.02, 109.10, 63.08, 55.92, 46.70, 27.51, 14.41, 8.44.  $[\alpha]_{\text{D}}^{25} = -70$  ( $c = 1.0$  in  $\text{CH}_2\text{Cl}_2$ ). The enantiomers were analyzed by HPLC using Daicel Chiralpak IE column at 254 nm (n-hexane/*i*-PrOH = 90/10), 0.7 mL/min; Major enantiomer:  $t_{\text{R}} = 29.62$  min, minor enantiomer:  $t_{\text{R}} = 72.78$  min. 95:5 *dr*, 99% *ee*. HRMS (ESI) calcd for  $\text{C}_{26}\text{H}_{26}\text{N}_2\text{O}_3\text{Na}$   $m/z$   $[\text{M}+\text{Na}]^+$ : 437.1836, found: 437.1838.

**4. HPLC spectra of products 3**

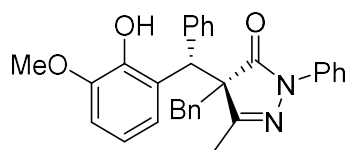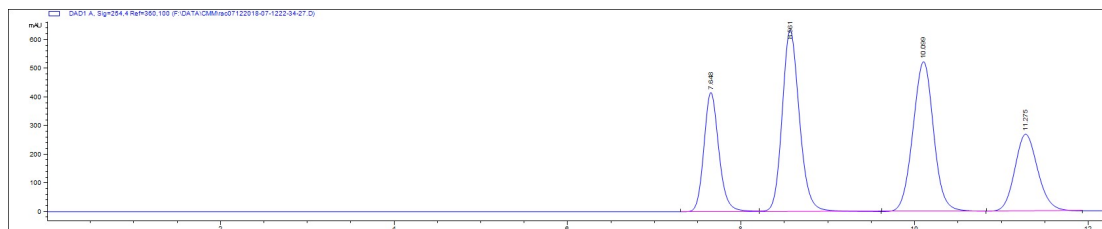

| # | 时间     | 峰面积    | 峰高    | 峰宽     | 对称因子  | 峰面积 %  | 类型 |
|---|--------|--------|-------|--------|-------|--------|----|
| 1 | 7.648  | 4986.5 | 415.1 | 0.1842 | 0.816 | 18.273 | BV |
| 2 | 8.561  | 8733.3 | 631.1 | 0.2134 | 0.809 | 32.004 | VB |
| 3 | 10.099 | 8648.2 | 521.2 | 0.2576 | 1.012 | 31.692 | BB |
| 4 | 11.275 | 4920.4 | 267.4 | 0.2827 | 0.848 | 18.031 | BB |

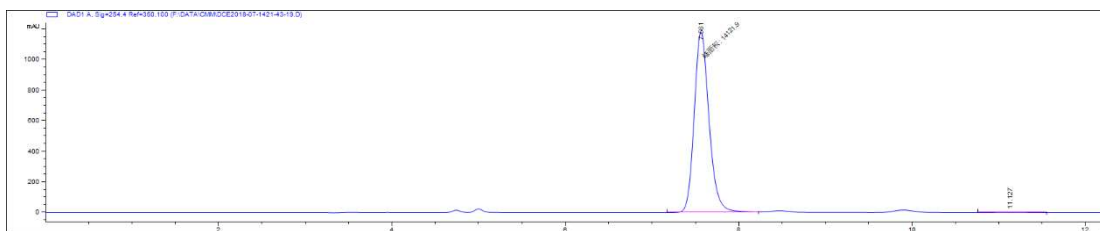

| # | 时间     | 峰面积     | 峰高     | 峰宽     | 对称因子  | 峰面积 %  | 类型   |
|---|--------|---------|--------|--------|-------|--------|------|
| 1 | 7.561  | 14337.3 | 1182.7 | 0.1811 | 0.787 | 99.853 | BV R |
| 2 | 11.127 | 21.1    | 1.2    | 0.2689 | 0.922 | 0.147  | BB   |

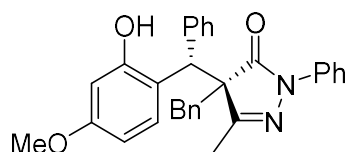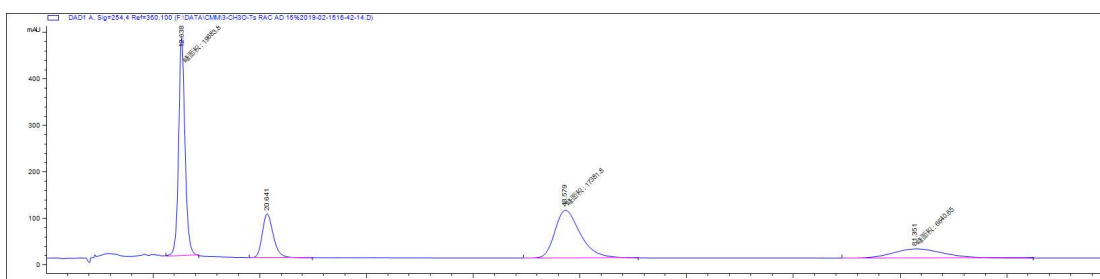

| # | 时间     | 峰面积     | 峰高    | 峰宽     | 对称因子  | 峰面积 %  | 类型 |
|---|--------|---------|-------|--------|-------|--------|----|
| 1 | 12.638 | 19683.8 | 470   | 0.698  | 0.866 | 39.022 | MM |
| 2 | 20.641 | 6736.1  | 94.2  | 1.0981 | 0.739 | 13.354 | BB |
| 3 | 48.579 | 17381.8 | 103.4 | 2.8022 | 0.7   | 34.459 | MM |
| 4 | 81.351 | 6640.7  | 19.8  | 5.581  | 0.812 | 13.165 | MM |

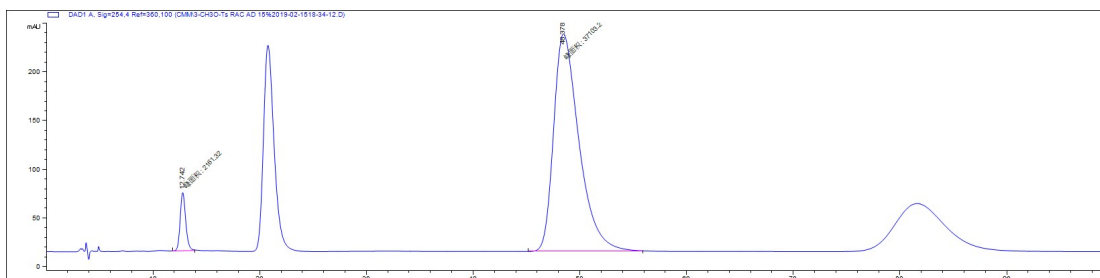

| # | 时间     | 峰面积     | 峰高    | 峰宽     | 对称因子  | 峰面积 %  | 类型 |
|---|--------|---------|-------|--------|-------|--------|----|
| 1 | 12.742 | 2161.3  | 59.6  | 0.6047 | 0.832 | 5.504  | MM |
| 2 | 48.378 | 37103.2 | 223.2 | 2.7709 | 0.608 | 94.496 | MM |

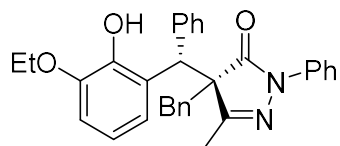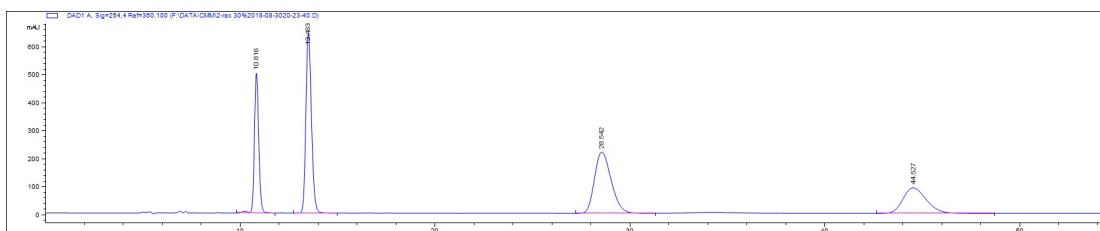

| # | 时间     | 峰面积     | 峰高    | 峰宽     | 对称因子  | 峰面积 %  | 类型   |
|---|--------|---------|-------|--------|-------|--------|------|
| 1 | 10.816 | 7786    | 500.7 | 0.2366 | 0.887 | 18.840 | VB R |
| 2 | 13.483 | 12830.3 | 643.5 | 0.3086 | 0.785 | 31.046 | BB   |
| 3 | 28.542 | 13065.2 | 219.3 | 0.9331 | 0.739 | 31.615 | BB   |
| 4 | 44.527 | 7644.9  | 91.5  | 1.2863 | 0.751 | 18.499 | BB   |

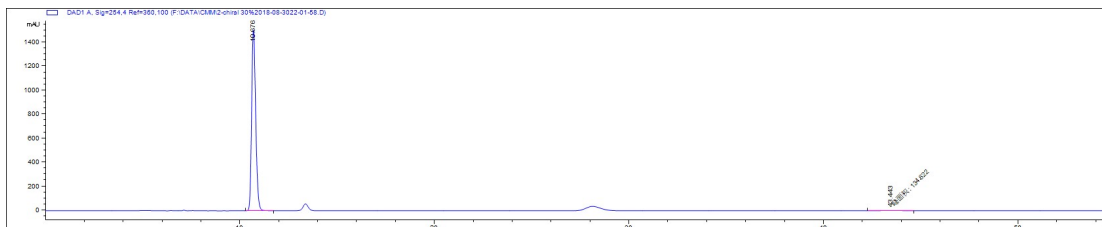

| # | 时间     | 峰面积     | 峰高     | 峰宽     | 对称因子  | 峰面积 %  | 类型 |
|---|--------|---------|--------|--------|-------|--------|----|
| 1 | 10.676 | 21867.1 | 1507.1 | 0.2253 | 0.766 | 99.388 | BB |
| 2 | 43.443 | 134.6   | 1.8    | 1.2569 | 0.902 | 0.612  | MM |

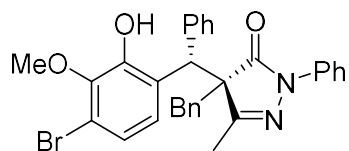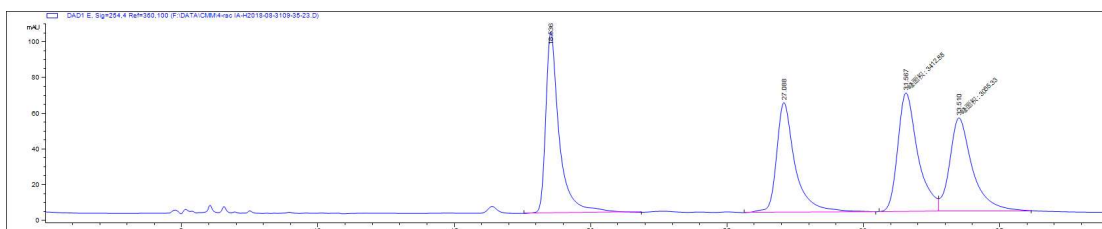

| # | 时间     | 峰面积    | 峰高   | 峰宽     | 对称因子  | 峰面积 %  | 类型 |
|---|--------|--------|------|--------|-------|--------|----|
| 1 | 18.536 | 3507.7 | 101  | 0.5052 | 0.529 | 27.223 | BB |
| 2 | 27.088 | 2908.9 | 61.2 | 0.6969 | 0.605 | 22.576 | BB |
| 3 | 31.567 | 3412.9 | 66.3 | 0.8581 | 0.675 | 26.488 | MF |
| 4 | 33.51  | 3055.3 | 52.2 | 0.9757 | 0.661 | 23.713 | FM |

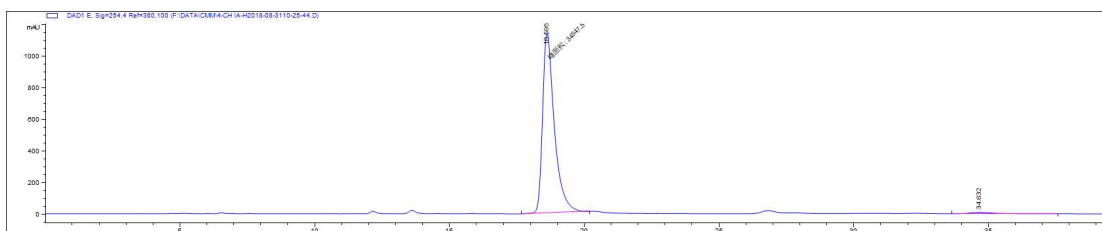

| # | 时间     | 峰面积     | 峰高     | 峰宽     | 对称因子  | 峰面积 %  | 类型 |
|---|--------|---------|--------|--------|-------|--------|----|
| 1 | 18.595 | 34547.5 | 1138.2 | 0.5059 | 0.587 | 98.475 | MM |
| 2 | 34.632 | 535     | 8.8    | 0.9019 | 0.6   | 1.525  | BB |

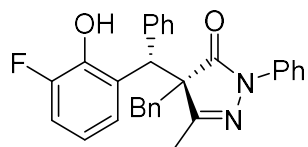

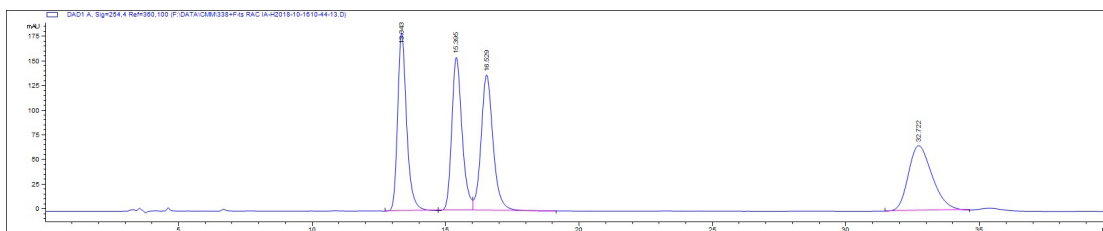

| # | 时间     | 峰面积    | 峰高    | 峰宽     | 对称因子  | 峰面积 %  | 类型 |
|---|--------|--------|-------|--------|-------|--------|----|
| 1 | 13.343 | 4274.7 | 181.6 | 0.3546 | 0.736 | 25.171 | BB |
| 2 | 15.395 | 4214.2 | 156.3 | 0.4106 | 0.76  | 24.815 | BV |
| 3 | 16.529 | 4368.8 | 138.5 | 0.4781 | 0.808 | 25.725 | VB |
| 4 | 32.722 | 4124.9 | 66.3  | 0.9475 | 0.725 | 24.289 | BB |

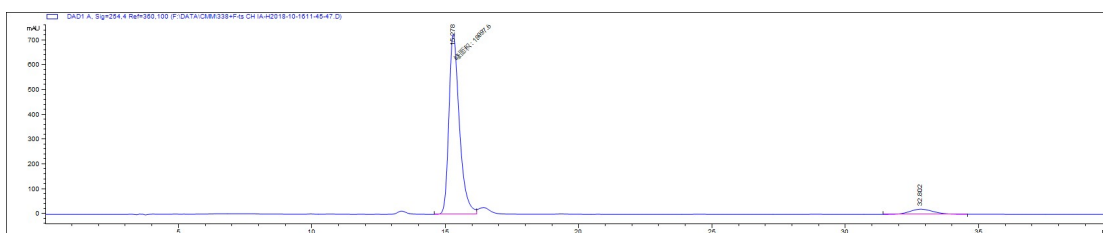

| # | 时间     | 峰面积     | 峰高    | 峰宽     | 对称因子  | 峰面积 %  | 类型 |
|---|--------|---------|-------|--------|-------|--------|----|
| 1 | 15.278 | 19997.6 | 727.6 | 0.458  | 0     | 93.931 | MF |
| 2 | 32.802 | 1292.2  | 20.8  | 0.9493 | 0.842 | 6.069  | BB |

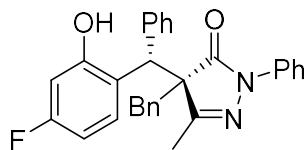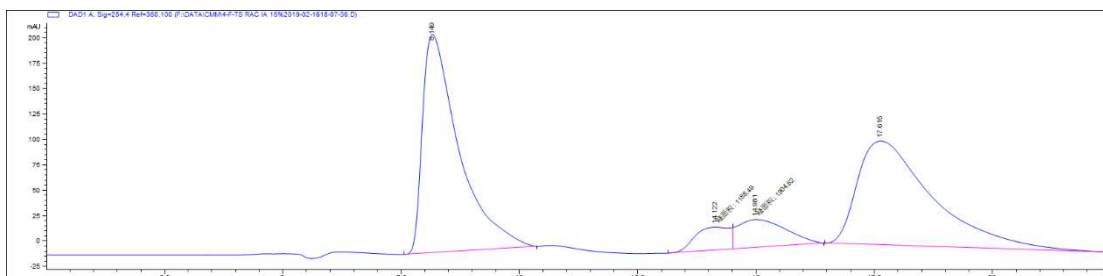

| # | 时间     | 峰面积     | 峰高    | 峰宽     | 对称因子  | 峰面积 %  | 类型  |
|---|--------|---------|-------|--------|-------|--------|-----|
| 1 | 8.149  | 11498.6 | 214.8 | 0.7985 | 0.345 | 44.471 | BB  |
| 2 | 14.122 | 1188.5  | 22.5  | 0.8791 | 0     | 4.597  | MF  |
| 3 | 14.981 | 1904.6  | 27.5  | 1.1528 | 0.585 | 7.366  | FM  |
| 4 | 17.615 | 11264.8 | 102.1 | 1.6087 | 0.416 | 43.567 | BBA |

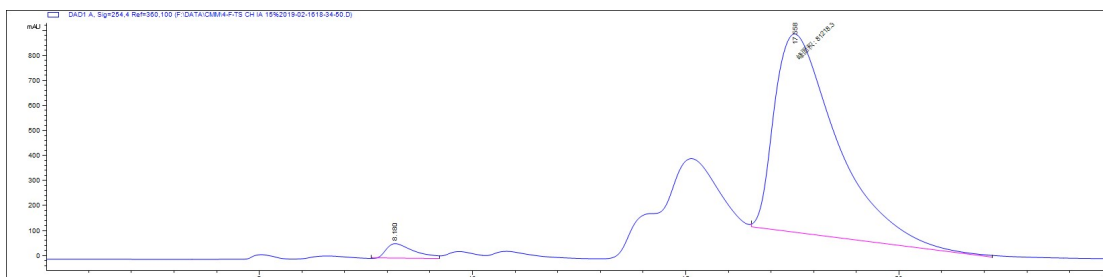

| # | 时间     | 峰面积     | 峰高    | 峰宽     | 对称因子  | 峰面积 %  | 类型 |
|---|--------|---------|-------|--------|-------|--------|----|
| 1 | 8.18   | 2726.7  | 59    | 0.6832 | 0.444 | 3.248  | BV |
| 2 | 17.558 | 81218.3 | 791.4 | 1.7104 | 0.452 | 96.752 | MM |

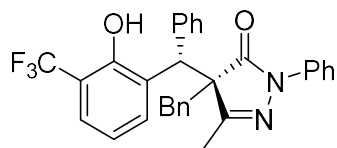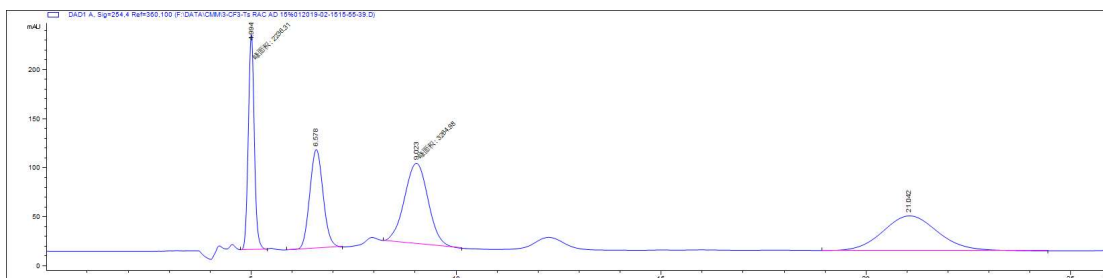

| # | 时间     | 峰面积    | 峰高    | 峰宽     | 对称因子  | 峰面积 %  | 类型 |
|---|--------|--------|-------|--------|-------|--------|----|
| 1 | 4.994  | 2236.3 | 219.5 | 0.1698 | 0.973 | 20.170 | MM |
| 2 | 6.578  | 2284.6 | 100.6 | 0.3549 | 0.923 | 20.605 | BB |
| 3 | 9.023  | 3265   | 81.8  | 0.665  | 0.986 | 29.447 | MM |
| 4 | 21.042 | 3301.7 | 35.4  | 1.4276 | 0.907 | 29.778 | BB |

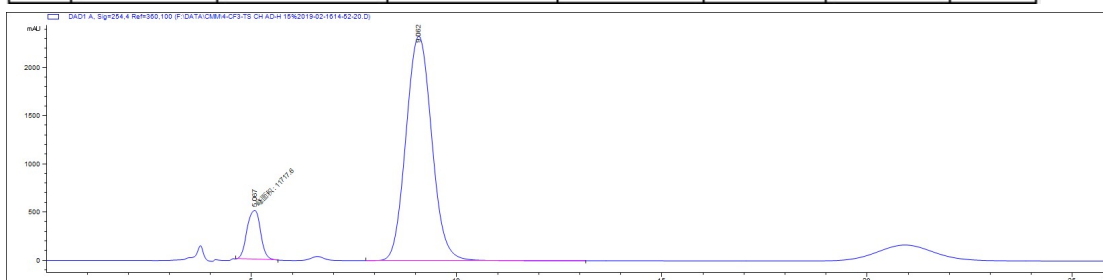

| # | 时间    | 峰面积      | 峰高     | 峰宽     | 对称因子  | 峰面积 %  | 类型 |
|---|-------|----------|--------|--------|-------|--------|----|
| 1 | 5.067 | 11717.6  | 507.7  | 0.3847 | 1.222 | 10.331 | MM |
| 2 | 9.062 | 101706.5 | 2327.4 | 0.6878 | 0.929 | 89.669 | BB |

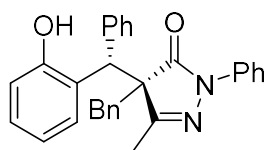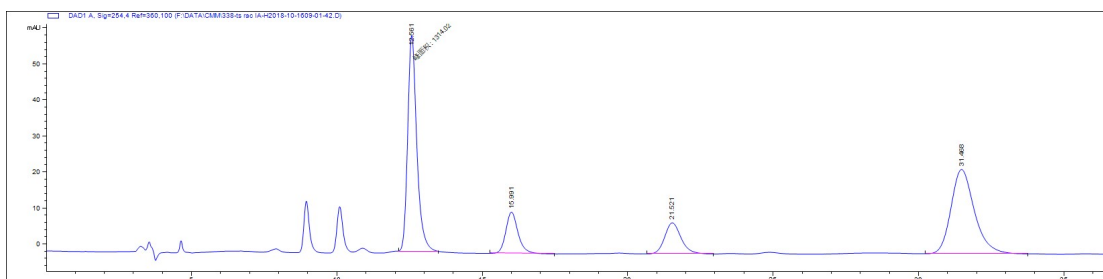

| # | 时间     | 峰面积    | 峰高   | 峰宽     | 对称因子  | 峰面积 %  | 类型 |
|---|--------|--------|------|--------|-------|--------|----|
| 1 | 12.561 | 1314   | 60   | 0.3647 | 0.764 | 39.812 | MM |
| 2 | 15.991 | 338.7  | 11.5 | 0.4479 | 0.804 | 10.262 | BB |
| 3 | 21.521 | 338.7  | 8.6  | 0.6043 | 0.821 | 10.262 | BB |
| 4 | 31.468 | 1309.1 | 23.4 | 0.847  | 0.773 | 39.663 | BB |

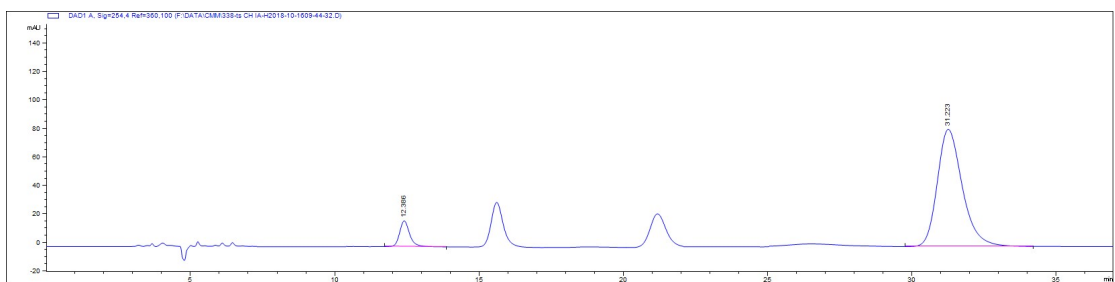

| # | 时间     | 峰面积    | 峰高   | 峰宽     | 对称因子  | 峰面积 %  | 类型 |
|---|--------|--------|------|--------|-------|--------|----|
| 1 | 12.386 | 441.3  | 18.1 | 0.3683 | 0.787 | 8.168  | BB |
| 2 | 31.223 | 4961.5 | 82.3 | 0.921  | 0.744 | 91.832 | BB |

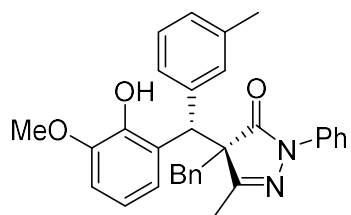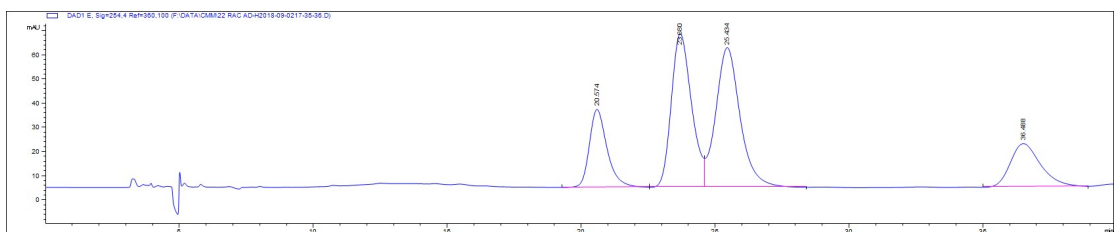

| # | 时间     | 峰面积    | 峰高   | 峰宽     | 对称因子  | 峰面积 %  | 类型 |
|---|--------|--------|------|--------|-------|--------|----|
| 1 | 20.574 | 1495.9 | 32.3 | 0.6996 | 0.715 | 15.059 | BB |
| 2 | 23.68  | 3356.5 | 63.7 | 0.8046 | 0.756 | 33.789 | BV |
| 3 | 25.434 | 3673.2 | 57.9 | 0.9557 | 0.832 | 36.977 | VB |
| 4 | 36.488 | 1408.1 | 17.9 | 1.1833 | 0.72  | 14.175 | BB |

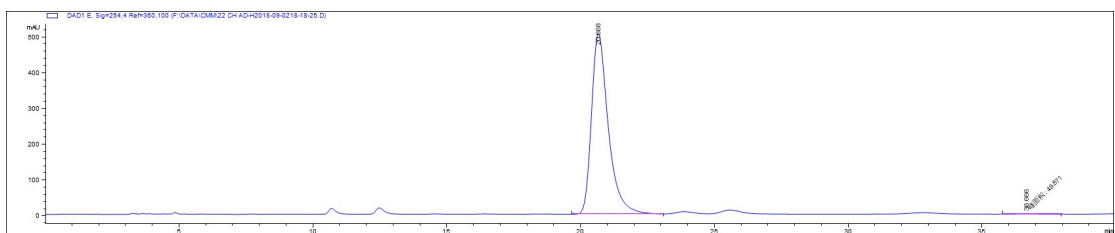

| # | 时间     | 峰面积     | 峰高     | 峰宽     | 对称因子  | 峰面积 %  | 类型 |
|---|--------|---------|--------|--------|-------|--------|----|
| 1 | 20.668 | 22032.7 | 505.8  | 0.6562 | 0.647 | 99.774 | BB |
| 2 | 36.666 | 49.9    | 7.6E-1 | 1.0922 | 0.734 | 0.226  | MM |

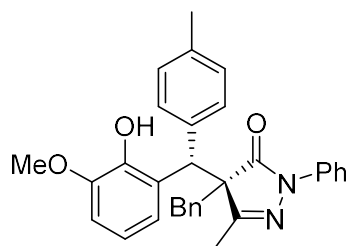

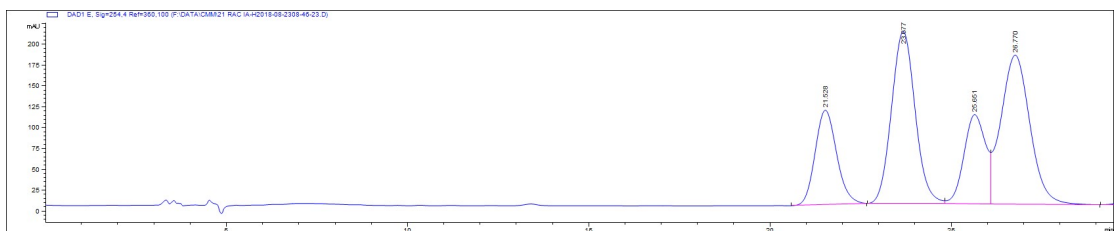

| # | 时间     | 峰面积    | 峰高    | 峰宽     | 对称因子  | 峰面积 %  | 类型 |
|---|--------|--------|-------|--------|-------|--------|----|
| 1 | 21.528 | 4667.7 | 113   | 0.6439 | 0.863 | 16.414 | BB |
| 2 | 23.677 | 9363.3 | 206   | 0.7084 | 0.929 | 32.927 | BV |
| 3 | 25.651 | 4458.4 | 106.9 | 0.6384 | 0.997 | 15.679 | VV |
| 4 | 26.77  | 9947.2 | 178.6 | 0.8519 | 0.912 | 34.980 | VB |

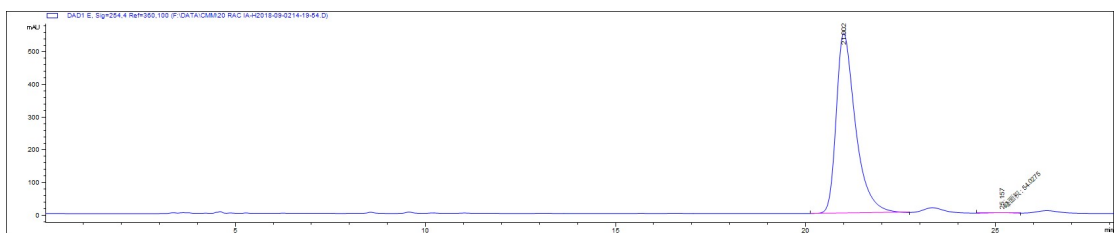

| # | 时间     | 峰面积     | 峰高    | 峰宽     | 对称因子  | 峰面积 %  | 类型 |
|---|--------|---------|-------|--------|-------|--------|----|
| 1 | 21.002 | 19400.2 | 551.4 | 0.5284 | 0.593 | 99.712 | BB |
| 2 | 25.157 | 56.1    | 1.6   | 0.6009 | 1.203 | 0.288  | MM |

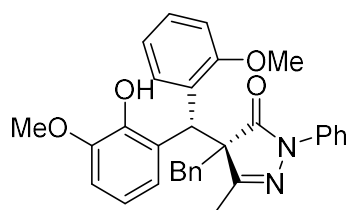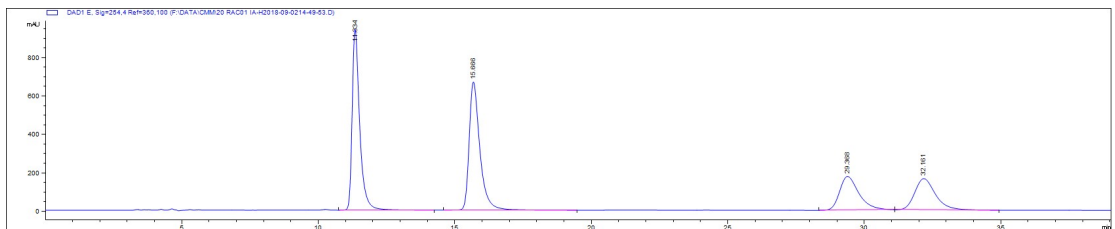

| # | 时间     | 峰面积     | 峰高    | 峰宽     | 对称因子  | 峰面积 %  | 类型 |
|---|--------|---------|-------|--------|-------|--------|----|
| 1 | 11.334 | 18092.5 | 939.6 | 0.2867 | 0.582 | 33.869 | BB |
| 2 | 15.666 | 18174.6 | 666.2 | 0.4083 | 0.6   | 34.022 | BB |
| 3 | 29.368 | 8588.3  | 175.3 | 0.7397 | 0.662 | 16.077 | BB |
| 4 | 32.161 | 8564.2  | 162.2 | 0.8039 | 0.734 | 16.032 | BB |

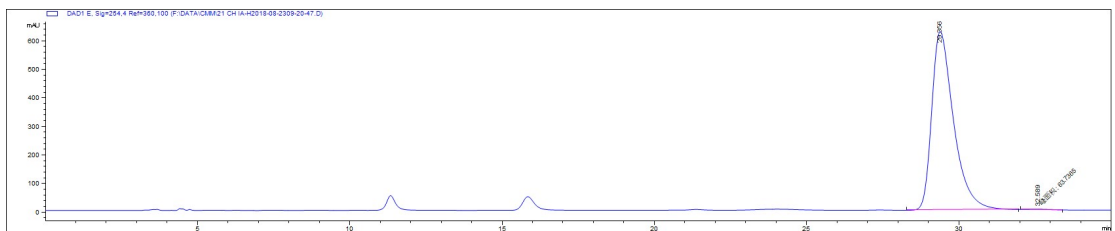

| # | 时间     | 峰面积     | 峰高    | 峰宽     | 对称因子  | 峰面积 %  | 类型 |
|---|--------|---------|-------|--------|-------|--------|----|
| 1 | 29.356 | 31298.9 | 626.9 | 0.7485 | 0.591 | 99.797 | BB |
| 2 | 32.589 | 63.7    | 1.5   | 0.6895 | 0.629 | 0.203  | MM |

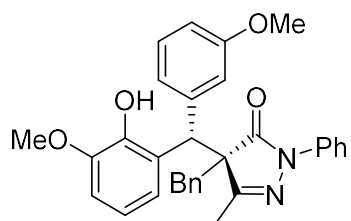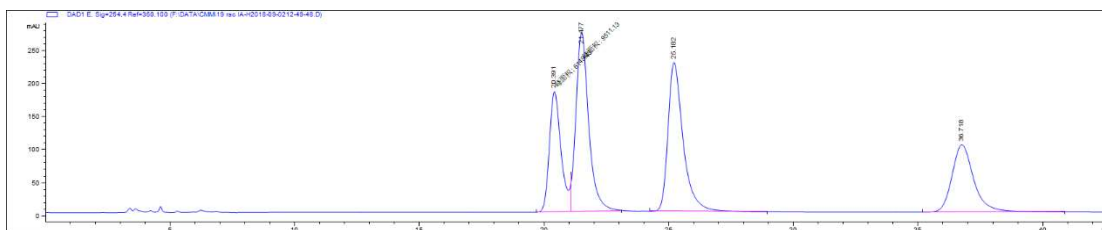

| # | 时间     | 峰面积    | 峰高    | 峰宽     | 对称因子  | 峰面积 %  | 类型 |
|---|--------|--------|-------|--------|-------|--------|----|
| 1 | 20.391 | 6149.4 | 182.7 | 0.5611 | 0     | 19.571 | MF |
| 2 | 21.477 | 9511.1 | 271.5 | 0.5838 | 0.72  | 30.269 | FM |
| 3 | 25.182 | 9536.9 | 225.7 | 0.633  | 0.613 | 30.351 | BB |
| 4 | 36.718 | 6224.1 | 102.2 | 0.9226 | 0.772 | 19.808 | BB |

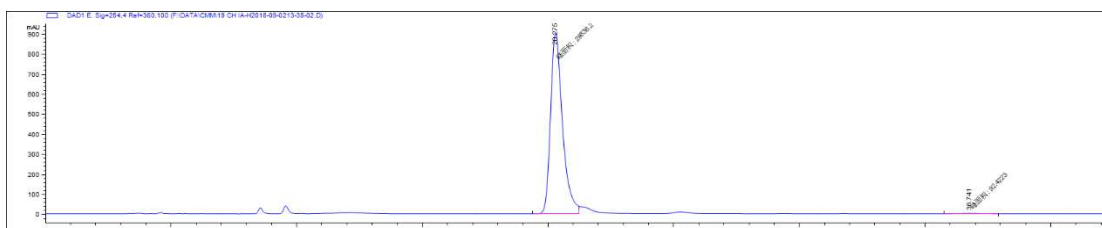

| # | 时间     | 峰面积     | 峰高    | 峰宽     | 对称因子  | 峰面积 %  | 类型 |
|---|--------|---------|-------|--------|-------|--------|----|
| 1 | 20.275 | 29836.2 | 902.1 | 0.5512 | 0.684 | 99.691 | MF |
| 2 | 36.741 | 92.4    | 1.5   | 1.002  | 0.893 | 0.309  | MM |

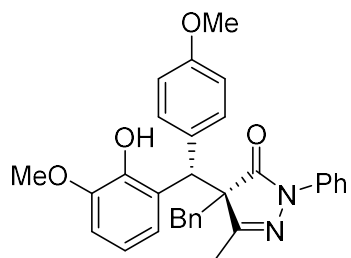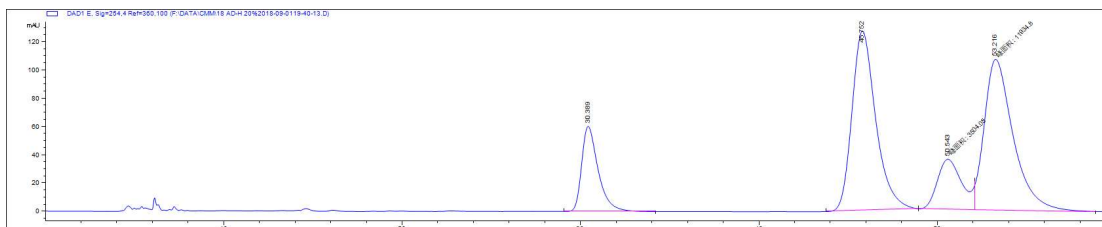

| # | 时间     | 峰面积     | 峰高    | 峰宽     | 对称因子  | 峰面积 %  | 类型 |
|---|--------|---------|-------|--------|-------|--------|----|
| 1 | 30.389 | 3871.1  | 60.2  | 0.9636 | 0.602 | 12.455 | BB |
| 2 | 45.752 | 11770   | 127.1 | 1.4086 | 0.736 | 37.870 | BB |
| 3 | 50.543 | 3504.1  | 35.5  | 1.6461 | 0     | 11.274 | MF |
| 4 | 53.216 | 11934.8 | 106.8 | 1.8632 | 0.607 | 38.400 | FM |

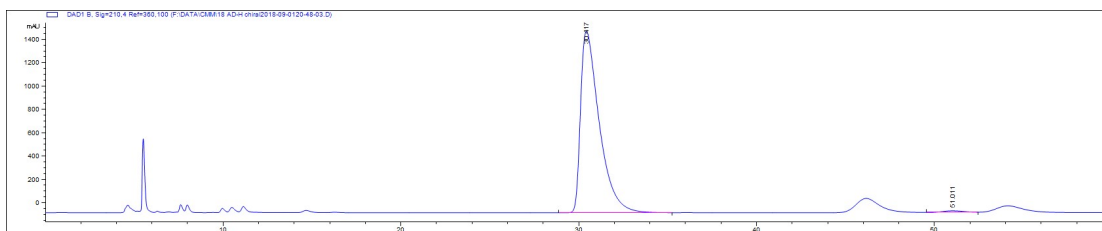

| # | 时间     | 峰面积      | 峰高     | 峰宽     | 对称因子  | 峰面积 %  | 类型 |
|---|--------|----------|--------|--------|-------|--------|----|
| 1 | 30.417 | 112963.9 | 1548.2 | 1.0912 | 0.416 | 99.107 | BB |
| 2 | 51.011 | 1018.4   | 12.9   | 1.17   | 0.925 | 0.893  | BB |

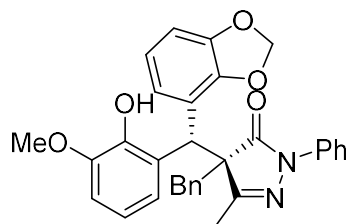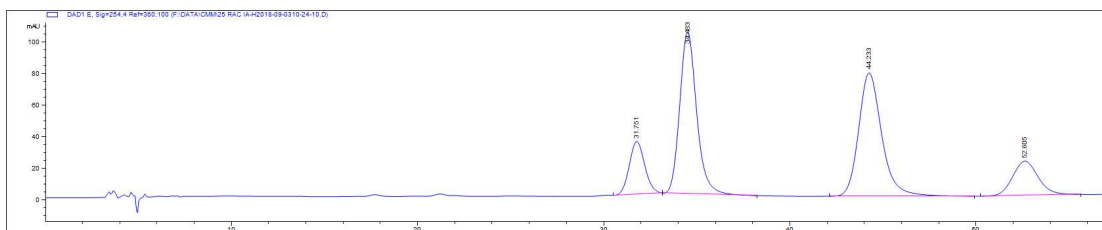

| # | 时间     | 峰面积    | 峰高    | 峰宽     | 对称因子  | 峰面积 %  | 类型 |
|---|--------|--------|-------|--------|-------|--------|----|
| 1 | 31.751 | 1939.2 | 33.5  | 0.8889 | 0.9   | 11.223 | BB |
| 2 | 34.483 | 6496.3 | 102.4 | 0.962  | 0.817 | 37.598 | BB |
| 3 | 44.233 | 6766.4 | 78.1  | 1.3168 | 0.773 | 39.161 | BB |
| 4 | 52.605 | 2076.4 | 21.7  | 1.4711 | 0.893 | 12.018 | BB |

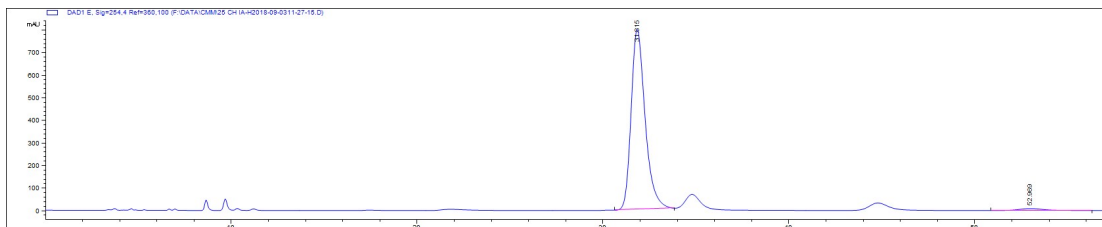

| # | 时间     | 峰面积     | 峰高    | 峰宽     | 对称因子  | 峰面积 %  | 类型 |
|---|--------|---------|-------|--------|-------|--------|----|
| 1 | 31.815 | 41671.3 | 794.8 | 0.8017 | 0.717 | 98.260 | BB |
| 2 | 52.969 | 737.7   | 8.3   | 1.3022 | 0.845 | 1.740  | BB |

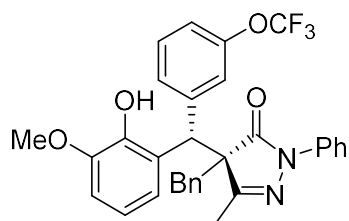

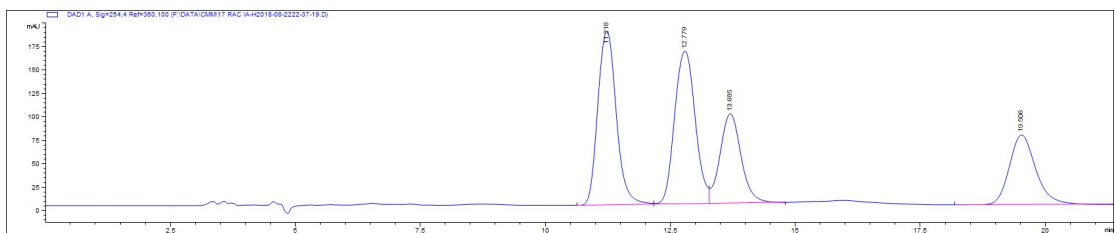

| # | 时间     | 峰面积    | 峰高    | 峰宽     | 对称因子  | 峰面积 %  | 类型  |
|---|--------|--------|-------|--------|-------|--------|-----|
| 1 | 11.218 | 4746.6 | 184.5 | 0.4061 | 0.894 | 31.843 | BV  |
| 2 | 12.779 | 4659   | 162.3 | 0.4569 | 0.961 | 31.256 | VV  |
| 3 | 13.685 | 2774.7 | 95    | 0.4526 | 0.894 | 18.614 | VB  |
| 4 | 19.506 | 2726   | 74.1  | 0.5634 | 0.8   | 18.287 | BBA |

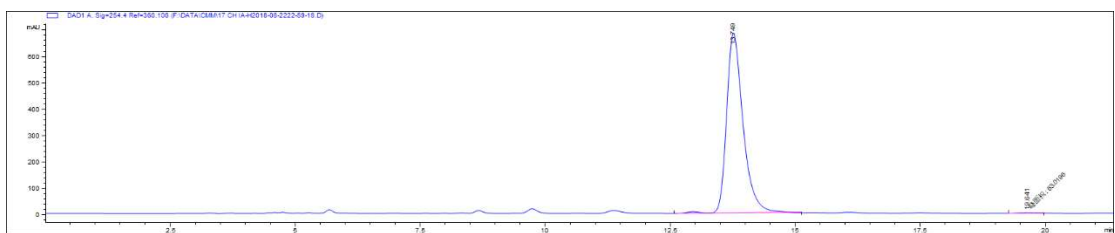

| # | 时间     | 峰面积     | 峰高    | 峰宽     | 对称因子  | 峰面积 %  | 类型   |
|---|--------|---------|-------|--------|-------|--------|------|
| 1 | 13.749 | 15756.4 | 682.7 | 0.3454 | 0.676 | 99.602 | VB R |
| 2 | 19.641 | 63      | 2.1   | 0.495  | 1.16  | 0.398  | MM   |

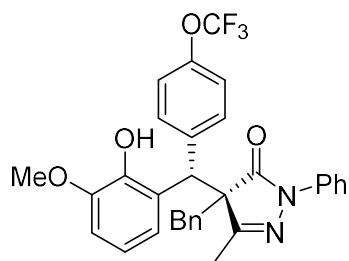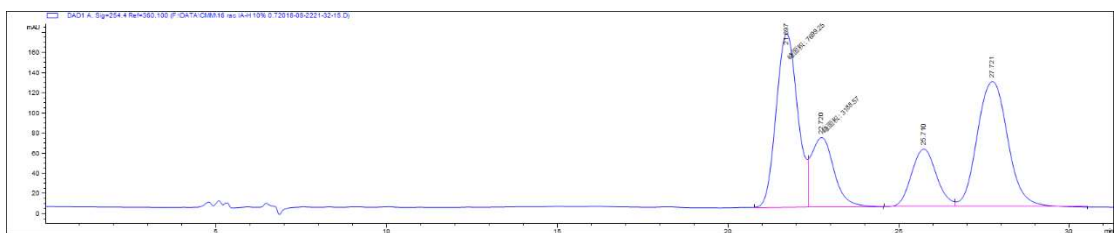

| # | 时间     | 峰面积    | 峰高    | 峰宽     | 对称因子  | 峰面积 %  | 类型 |
|---|--------|--------|-------|--------|-------|--------|----|
| 1 | 21.697 | 7699.2 | 173.5 | 0.7397 | 0     | 35.595 | MF |
| 2 | 22.72  | 3188.6 | 69.8  | 0.7615 | 0.719 | 14.741 | FM |
| 3 | 25.71  | 2932.5 | 57.5  | 0.8015 | 0.921 | 13.557 | BV |
| 4 | 27.721 | 7810   | 124.7 | 0.9924 | 0.934 | 36.107 | VB |

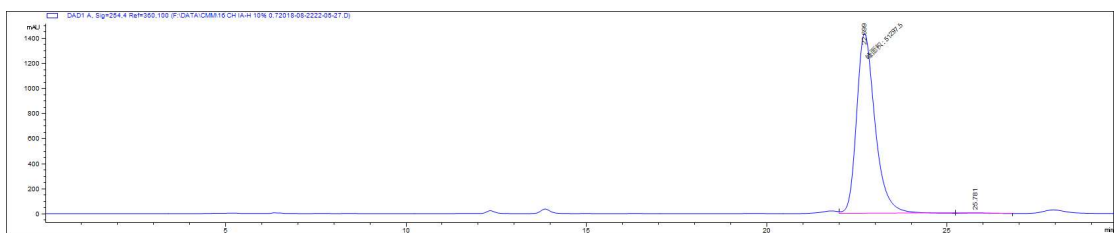

| # | 时间     | 峰面积     | 峰高     | 峰宽     | 对称因子  | 峰面积 %  | 类型 |
|---|--------|---------|--------|--------|-------|--------|----|
| 1 | 22.699 | 51297.5 | 1438.4 | 0.5944 | 0.721 | 99.773 | FM |
| 2 | 25.781 | 116.7   | 3.1    | 0.5627 | 0.703 | 0.227  | BB |

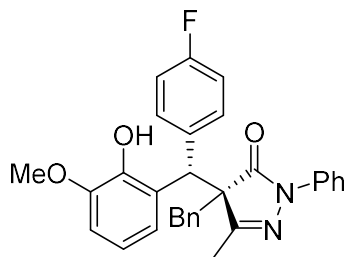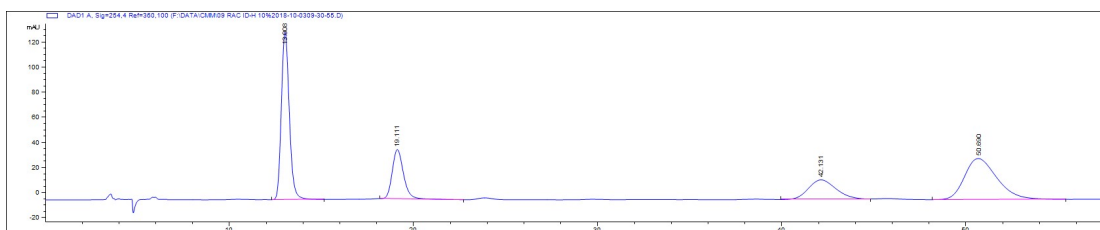

| # | 时间     | 峰面积    | 峰高   | 峰宽     | 对称因子  | 峰面积 %  | 类型 |
|---|--------|--------|------|--------|-------|--------|----|
| 1 | 13.008 | 4003.8 | 133  | 0.4652 | 0.811 | 35.556 | BB |
| 2 | 19.111 | 1665.7 | 39.1 | 0.6513 | 0.777 | 14.792 | BB |
| 3 | 42.131 | 1597.4 | 15.4 | 1.5101 | 0.818 | 14.186 | BB |
| 4 | 50.69  | 3993.7 | 32.5 | 1.8358 | 0.713 | 35.466 | BB |

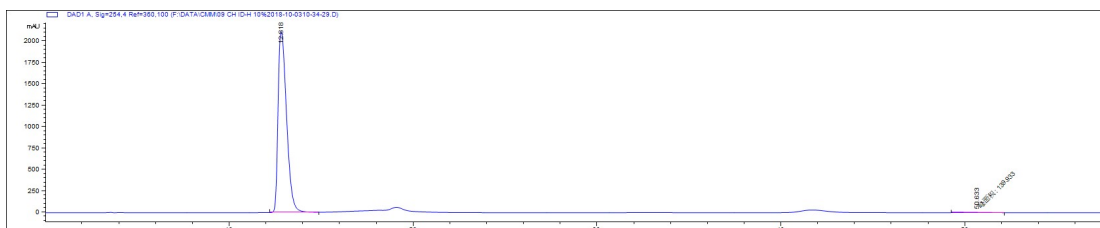

| # | 时间     | 峰面积     | 峰高     | 峰宽     | 对称因子  | 峰面积 %  | 类型 |
|---|--------|---------|--------|--------|-------|--------|----|
| 1 | 12.818 | 67924.8 | 2111.8 | 0.5032 | 0.539 | 99.794 | BB |
| 2 | 50.633 | 139.9   | 1.5    | 1.5929 | 0.881 | 0.206  | MM |

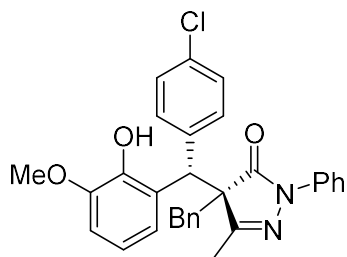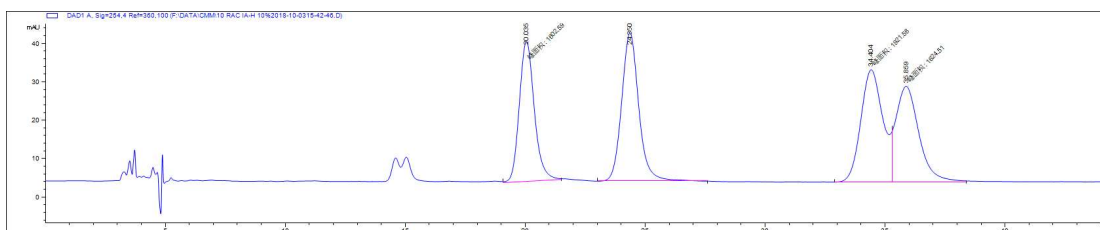

| # | 时间     | 峰面积    | 峰高   | 峰宽     | 对称因子  | 峰面积 %  | 类型 |
|---|--------|--------|------|--------|-------|--------|----|
| 1 | 20.035 | 1602.6 | 36.5 | 0.7309 | 0.864 | 22.665 | MM |
| 2 | 24.35  | 1922.2 | 38.6 | 0.7585 | 0.875 | 27.185 | BB |
| 3 | 34.404 | 1921.6 | 29.3 | 1.0924 | 0     | 27.176 | MF |
| 4 | 35.859 | 1624.5 | 25   | 1.0832 | 0.697 | 22.975 | FM |

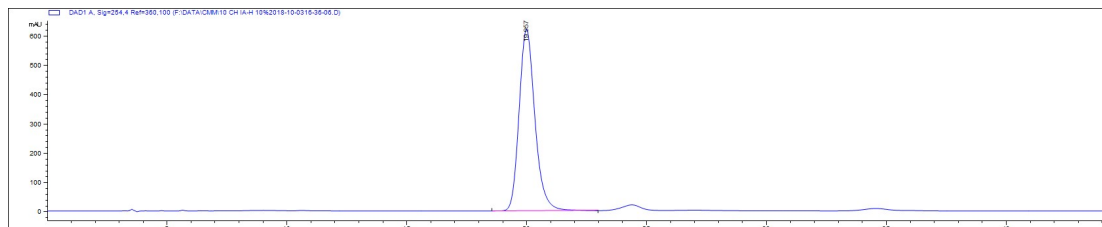

| # | 时间     | 峰面积     | 峰高    | 峰宽     | 对称因子  | 峰面积 %   | 类型 |
|---|--------|---------|-------|--------|-------|---------|----|
| 1 | 19.957 | 28352.6 | 617.5 | 0.7037 | 0.808 | 100.000 | BB |

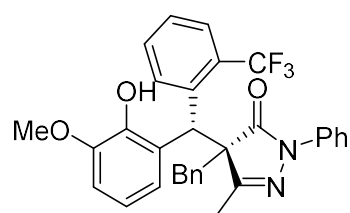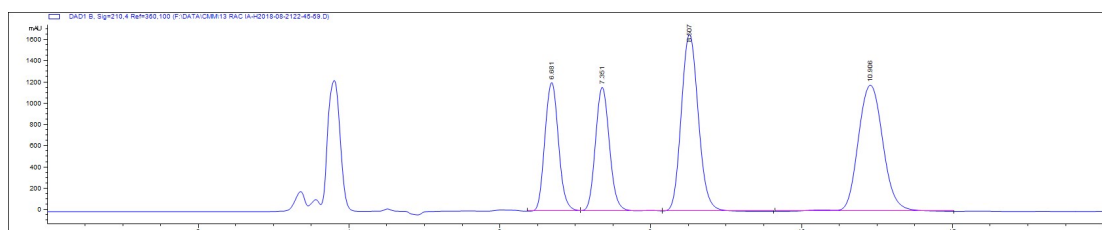

| # | 时间     | 峰面积     | 峰高     | 峰宽     | 对称因子  | 峰面积 %  | 类型   |
|---|--------|---------|--------|--------|-------|--------|------|
| 1 | 6.681  | 15261.5 | 1212   | 0.1989 | 0.945 | 18.209 | BV   |
| 2 | 7.351  | 15118.1 | 1166.1 | 0.2026 | 0.885 | 18.038 | VV R |
| 3 | 8.507  | 26140.8 | 1665.8 | 0.2471 | 0.87  | 31.190 | BB   |
| 4 | 10.906 | 27292.1 | 1188.8 | 0.3609 | 0.955 | 32.563 | VB R |

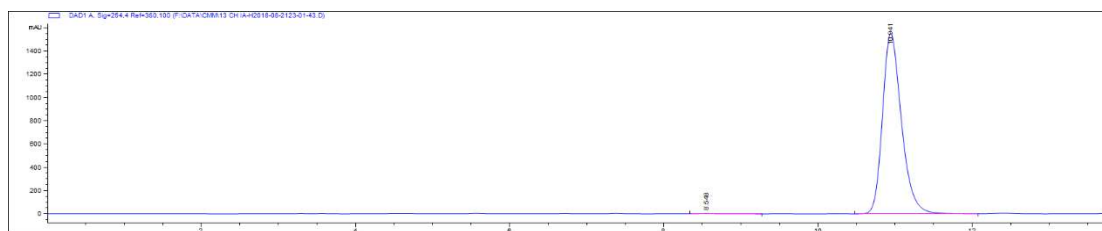

| # | 时间     | 峰面积     | 峰高     | 峰宽     | 对称因子  | 峰面积 %  | 类型 |
|---|--------|---------|--------|--------|-------|--------|----|
| 1 | 8.548  | 36.8    | 2.8    | 0.2021 | 0.707 | 0.138  | BB |
| 2 | 10.941 | 26583.1 | 1555.9 | 0.2613 | 0.719 | 99.862 | BB |

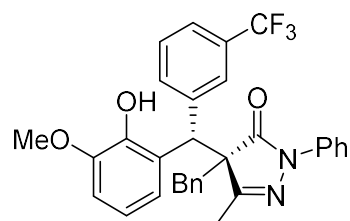

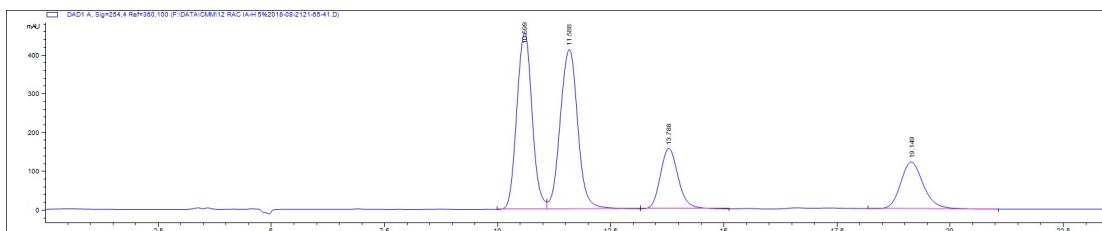

| # | 时间     | 峰面积     | 峰高    | 峰宽     | 对称因子  | 峰面积 %  | 类型 |
|---|--------|---------|-------|--------|-------|--------|----|
| 1 | 10.599 | 10719.1 | 457   | 0.3697 | 0.994 | 35.272 | BV |
| 2 | 11.588 | 11174   | 412.8 | 0.4278 | 1.012 | 36.769 | VB |
| 3 | 13.788 | 4285.3  | 156.2 | 0.428  | 0.838 | 14.101 | BB |
| 4 | 19.149 | 4211.5  | 120.9 | 0.5346 | 0.811 | 13.858 | BB |

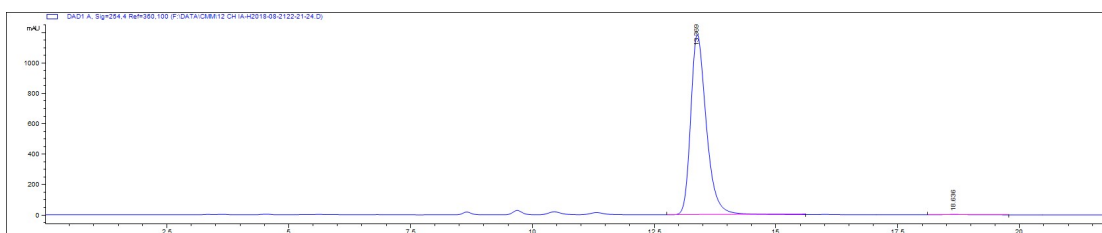

| # | 时间     | 峰面积     | 峰高     | 峰宽     | 对称因子  | 峰面积 %  | 类型 |
|---|--------|---------|--------|--------|-------|--------|----|
| 1 | 13.369 | 26540.4 | 1189.8 | 0.3382 | 0.67  | 99.727 | BB |
| 2 | 18.636 | 72.6    | 2.2    | 0.4939 | 0.646 | 0.273  | BB |

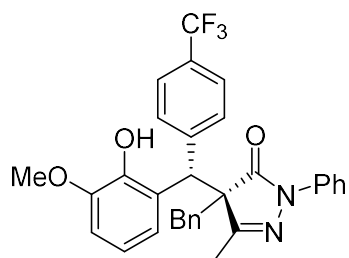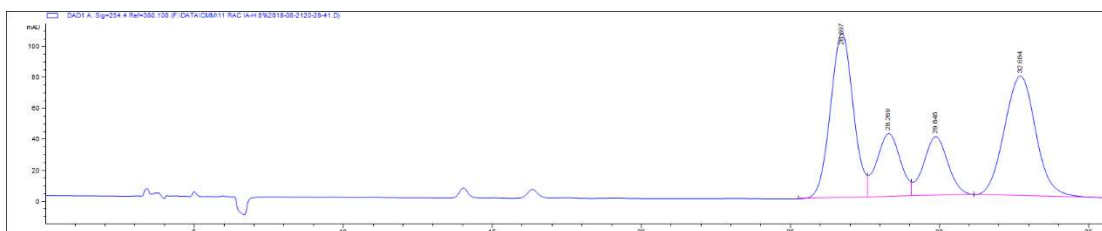

| # | 时间     | 峰面积    | 峰高    | 峰宽     | 对称因子  | 峰面积 %  | 类型  |
|---|--------|--------|-------|--------|-------|--------|-----|
| 1 | 26.697 | 5668.9 | 106.5 | 0.823  | 0.974 | 36.025 | BV  |
| 2 | 28.269 | 2257.9 | 40.7  | 0.8451 | 0.975 | 14.348 | VV  |
| 3 | 29.845 | 2147.9 | 38    | 0.8591 | 0.969 | 13.649 | VB  |
| 4 | 32.684 | 5661.4 | 77.3  | 1.1342 | 0.993 | 35.977 | BBA |

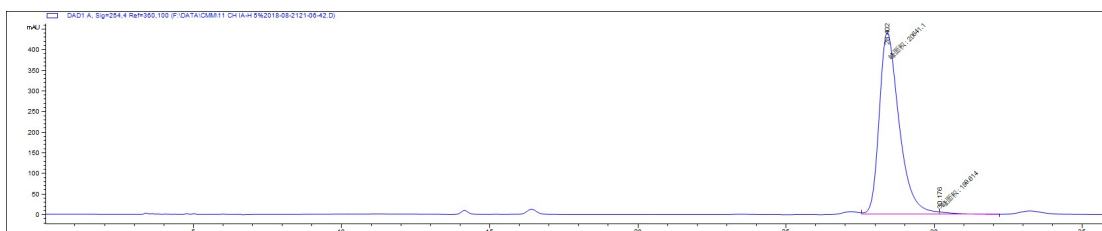

| # | 时间     | 峰面积     | 峰高    | 峰宽     | 对称因子  | 峰面积 %  | 类型 |
|---|--------|---------|-------|--------|-------|--------|----|
| 1 | 28.402 | 20641.1 | 440.2 | 0.7816 | 0.644 | 99.042 | MF |
| 2 | 30.176 | 199.6   | 6     | 0.5502 | 0     | 0.958  | FM |

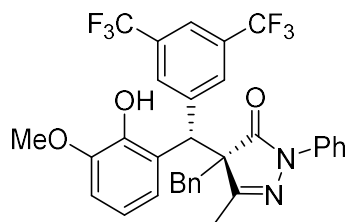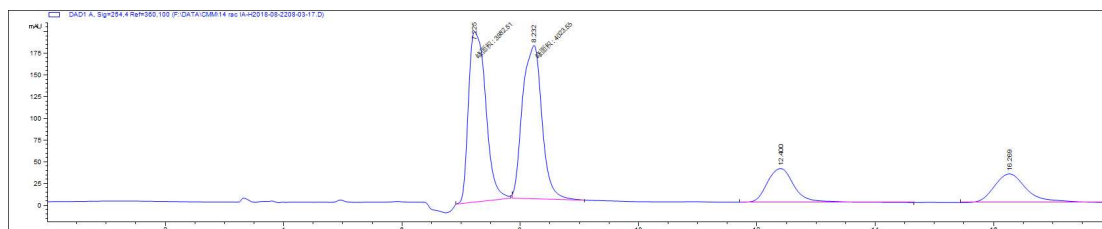

| # | 时间     | 峰面积    | 峰高    | 峰宽     | 对称因子  | 峰面积 %  | 类型 |
|---|--------|--------|-------|--------|-------|--------|----|
| 1 | 7.225  | 3982.5 | 195.9 | 0.3389 | 0.542 | 37.963 | MM |
| 2 | 8.232  | 4023.6 | 176.4 | 0.3802 | 1.335 | 38.354 | MM |
| 3 | 12.4   | 1228.3 | 38.8  | 0.4994 | 0.884 | 11.709 | BB |
| 4 | 16.269 | 1256.2 | 32.9  | 0.5895 | 0.796 | 11.974 | BB |

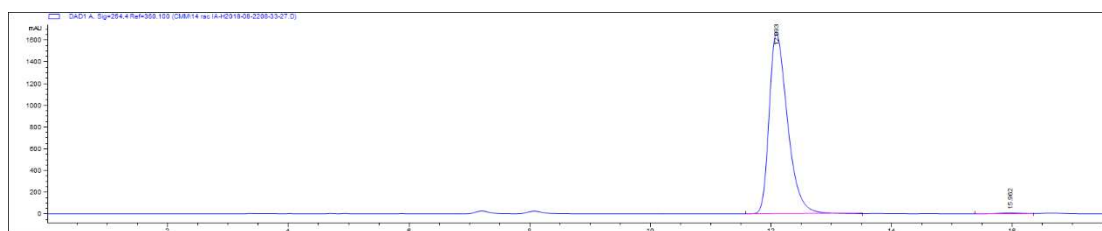

| # | 时间     | 峰面积     | 峰高     | 峰宽     | 对称因子  | 峰面积 %  | 类型 |
|---|--------|---------|--------|--------|-------|--------|----|
| 1 | 12.093 | 35111.6 | 1656.4 | 0.3253 | 0.604 | 99.365 | BB |
| 2 | 15.962 | 224.2   | 7.7    | 0.4444 | 0.798 | 0.635  | BV |

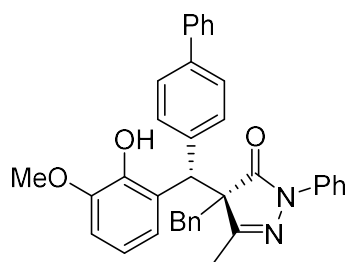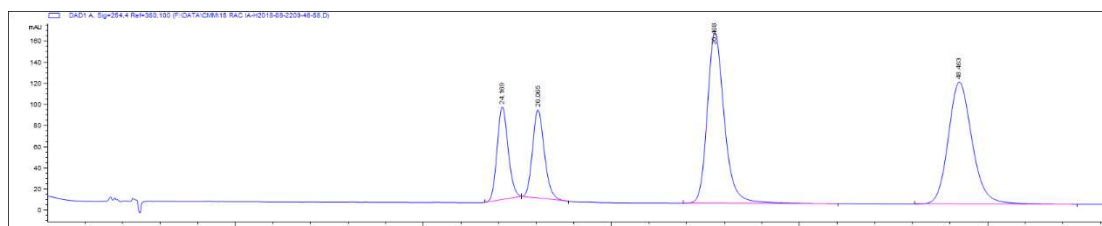

| # | 时间     | 峰面积     | 峰高    | 峰宽     | 对称因子  | 峰面积 %  | 类型 |
|---|--------|---------|-------|--------|-------|--------|----|
| 1 | 24.169 | 3563.7  | 87.3  | 0.6303 | 0.858 | 12.940 | BB |
| 2 | 26.065 | 3645.3  | 82.9  | 0.6747 | 0.805 | 13.236 | BB |
| 3 | 35.468 | 10159.5 | 161.1 | 0.9615 | 0.741 | 36.889 | BB |
| 4 | 48.463 | 10172   | 115.1 | 1.3691 | 0.811 | 36.935 | BB |

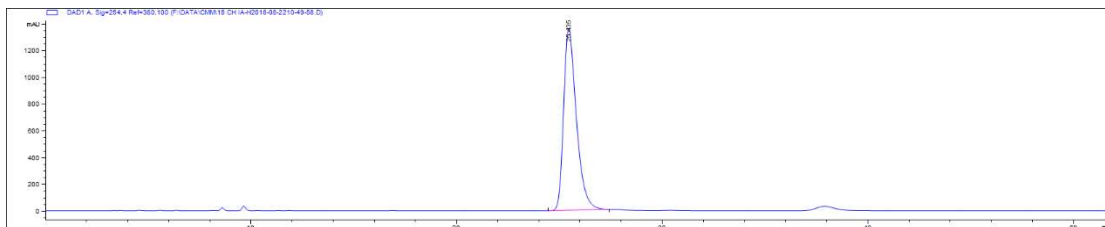

| # | 时间     | 峰面积     | 峰高     | 峰宽     | 对称因子  | 峰面积 %   | 类型 |
|---|--------|---------|--------|--------|-------|---------|----|
| 1 | 25.435 | 58362.4 | 1348.2 | 0.6571 | 0.624 | 100.000 | BB |

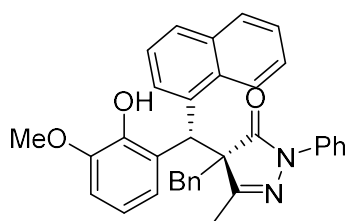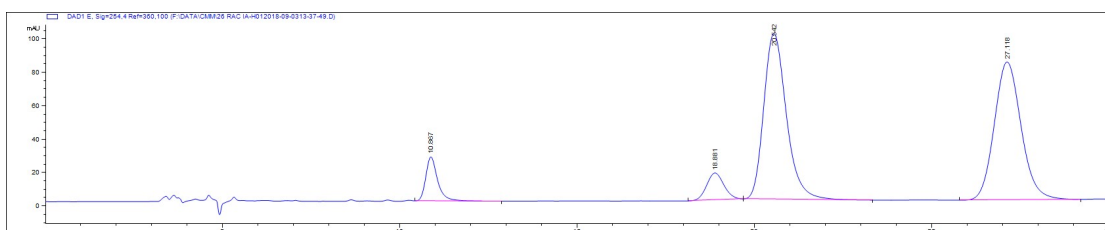

| # | 时间     | 峰面积    | 峰高   | 峰宽     | 对称因子  | 峰面积 %  | 类型 |
|---|--------|--------|------|--------|-------|--------|----|
| 1 | 10.867 | 610.6  | 26.3 | 0.3491 | 0.698 | 6.175  | BB |
| 2 | 18.881 | 545    | 16.1 | 0.5249 | 0.907 | 5.511  | BB |
| 3 | 20.542 | 4394.6 | 99   | 0.688  | 0.759 | 44.439 | BB |
| 4 | 27.118 | 4338.7 | 82.4 | 0.8179 | 0.866 | 43.875 | BB |

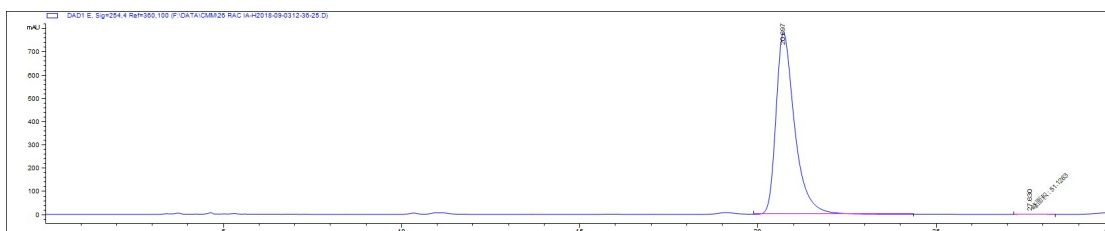

| # | 时间     | 峰面积     | 峰高     | 峰宽     | 对称因子  | 峰面积 %  | 类型 |
|---|--------|---------|--------|--------|-------|--------|----|
| 1 | 20.697 | 28433.9 | 779.4  | 0.5496 | 0.615 | 99.821 | BB |
| 2 | 27.63  | 51.1    | 8.7E-1 | 0.9776 | 0.668 | 0.179  | MM |

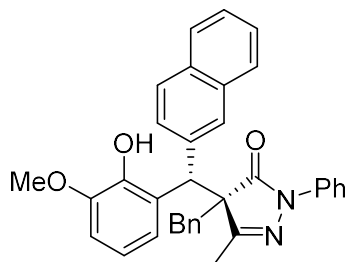

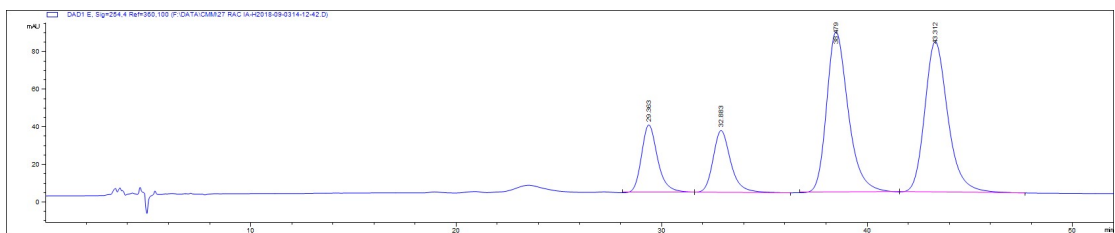

| # | 时间     | 峰面积    | 峰高   | 峰宽     | 对称因子  | 峰面积 %  | 类型 |
|---|--------|--------|------|--------|-------|--------|----|
| 1 | 29.363 | 1968.3 | 35.9 | 0.8329 | 0.779 | 11.970 | BB |
| 2 | 32.883 | 1959.3 | 32.8 | 0.9081 | 0.769 | 11.916 | BB |
| 3 | 38.479 | 6250.4 | 85.3 | 1.1188 | 0.723 | 38.013 | BB |
| 4 | 43.312 | 6265   | 80   | 1.1992 | 0.782 | 38.101 | BB |

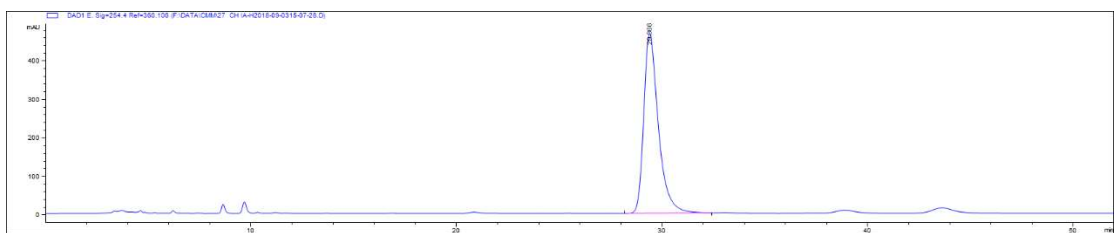

| # | 时间     | 峰面积     | 峰高    | 峰宽     | 对称因子  | 峰面积 %   | 类型 |
|---|--------|---------|-------|--------|-------|---------|----|
| 1 | 29.366 | 23153.2 | 468.3 | 0.7428 | 0.629 | 100.000 | BB |

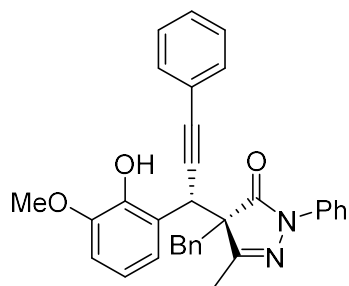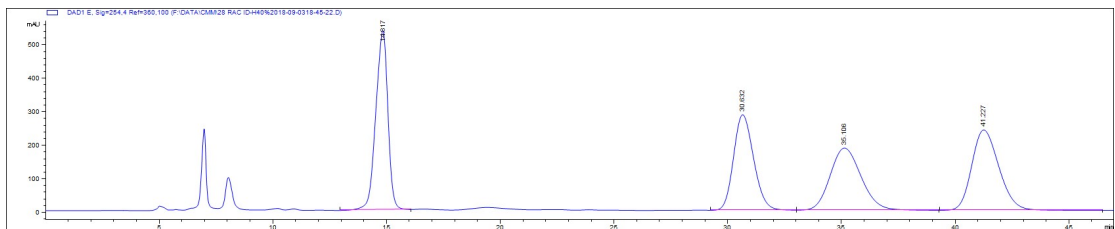

| # | 时间     | 峰面积     | 峰高    | 峰宽     | 对称因子  | 峰面积 %  | 类型 |
|---|--------|---------|-------|--------|-------|--------|----|
| 1 | 14.817 | 19862   | 536.8 | 0.5936 | 1.353 | 26.543 | BB |
| 2 | 30.632 | 17490.6 | 285.5 | 0.9547 | 0.799 | 23.374 | BB |
| 3 | 35.106 | 17568.1 | 185.7 | 1.4776 | 0.823 | 23.477 | BB |
| 4 | 41.227 | 19909.3 | 240.2 | 1.2911 | 0.757 | 26.606 | BB |

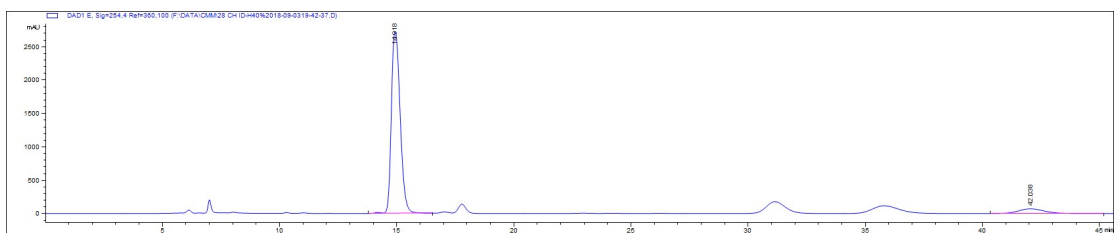

| # | 时间     | 峰面积     | 峰高     | 峰宽     | 对称因子  | 峰面积 %  | 类型   |
|---|--------|---------|--------|--------|-------|--------|------|
| 1 | 14.918 | 70436.9 | 2701.7 | 0.4071 | 0.712 | 93.053 | VB R |
| 2 | 42.038 | 5258.9  | 69     | 1.1835 | 0.833 | 6.947  | BBA  |

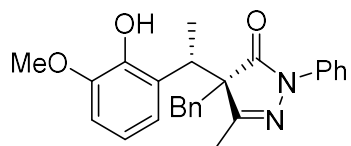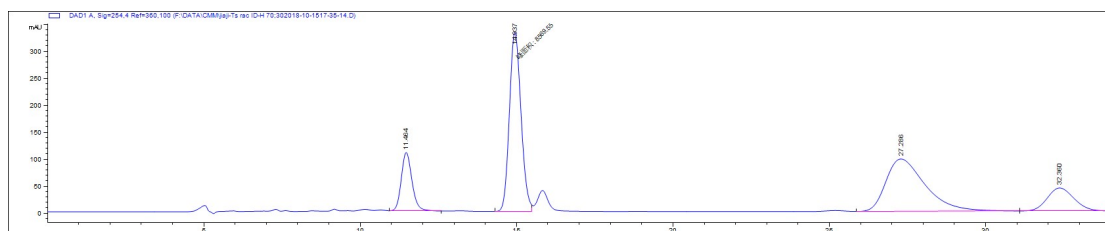

| # | 时间     | 峰面积    | 峰高    | 峰宽     | 对称因子  | 峰面积 %  | 类型 |
|---|--------|--------|-------|--------|-------|--------|----|
| 1 | 11.464 | 2557.8 | 107.6 | 0.3655 | 0.816 | 11.601 | BB |
| 2 | 14.937 | 8569.6 | 331.3 | 0.4312 | 0.851 | 38.867 | MM |
| 3 | 27.286 | 8404.9 | 96.6  | 1.3275 | 0.58  | 38.120 | BB |
| 4 | 32.36  | 2516.1 | 42.4  | 0.9261 | 0.834 | 11.412 | BB |

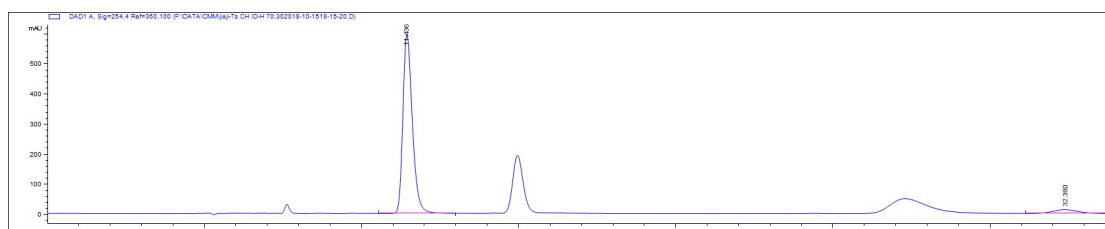

| # | 时间     | 峰面积     | 峰高    | 峰宽     | 对称因子  | 峰面积 %  | 类型 |
|---|--------|---------|-------|--------|-------|--------|----|
| 1 | 11.436 | 12543.9 | 596.6 | 0.3213 | 0.686 | 94.637 | BB |
| 2 | 32.38  | 710.9   | 12.6  | 0.8791 | 0.901 | 5.363  | BB |

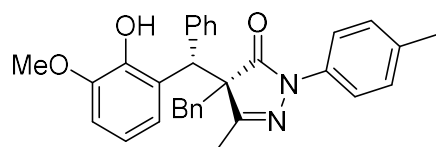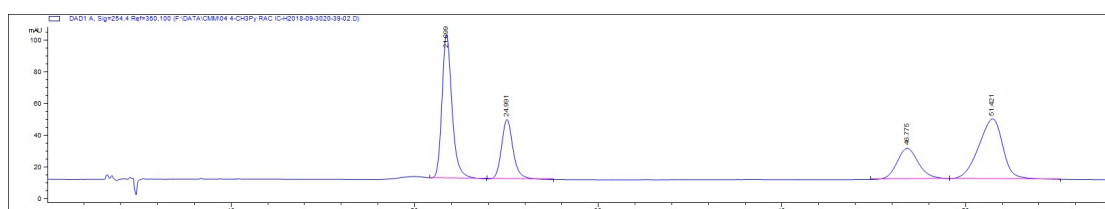

| # | 时间     | 峰面积    | 峰高   | 峰宽     | 对称因子  | 峰面积 %  | 类型 |
|---|--------|--------|------|--------|-------|--------|----|
| 1 | 21.699 | 3454.6 | 90.5 | 0.5794 | 0.763 | 34.089 | BB |
| 2 | 24.991 | 1650.2 | 37.5 | 0.6708 | 0.829 | 16.284 | BB |
| 3 | 46.775 | 1568.3 | 19.3 | 1.2316 | 0.879 | 15.475 | BB |
| 4 | 51.421 | 3461   | 37.8 | 1.3625 | 1.284 | 34.152 | BB |

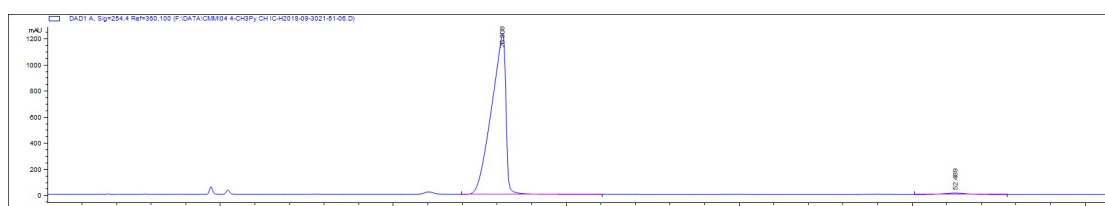

| # | 时间     | 峰面积    | 峰高     | 峰宽     | 对称因子  | 峰面积 %  | 类型 |
|---|--------|--------|--------|--------|-------|--------|----|
| 1 | 26.308 | 70960  | 1221.5 | 0.8197 | 3.201 | 98.523 | BB |
| 2 | 52.489 | 1063.6 | 10.9   | 1.4176 | 1.006 | 1.477  | BB |

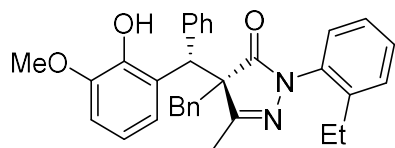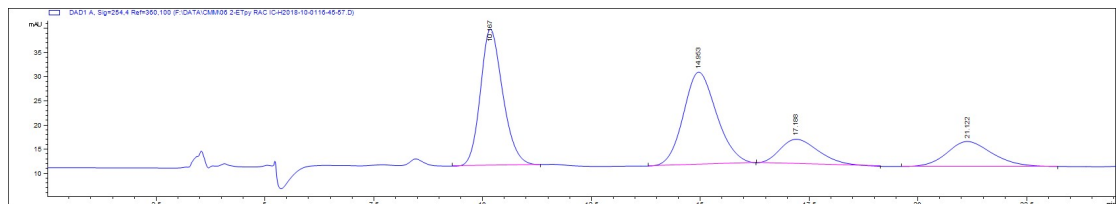

| # | 时间     | 峰面积    | 峰高   | 峰宽     | 对称因子  | 峰面积 %  | 类型 |
|---|--------|--------|------|--------|-------|--------|----|
| 1 | 10.167 | 1009.6 | 28.3 | 0.5445 | 0.766 | 37.133 | BB |
| 2 | 14.953 | 1016.2 | 19.2 | 0.8169 | 0.825 | 37.378 | BB |
| 3 | 17.188 | 317.4  | 5.1  | 0.9093 | 0.666 | 11.673 | BB |
| 4 | 21.122 | 375.6  | 5.2  | 0.9927 | 0.794 | 13.816 | BB |

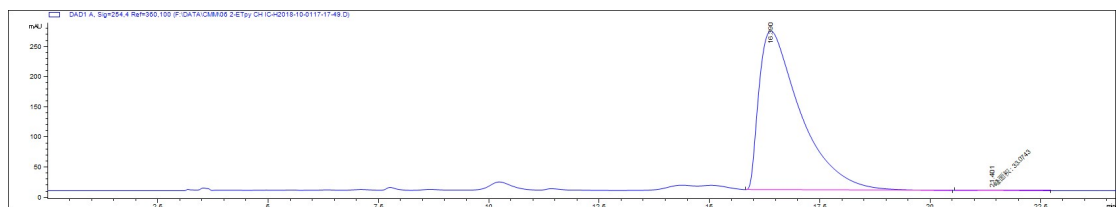

| # | 时间     | 峰面积     | 峰高     | 峰宽     | 对称因子  | 峰面积 %  | 类型 |
|---|--------|---------|--------|--------|-------|--------|----|
| 1 | 16.39  | 17232.9 | 263.5  | 0.9849 | 0.362 | 99.808 | BB |
| 2 | 21.401 | 33.1    | 5.2E-1 | 1.0704 | 0.636 | 0.192  | MM |

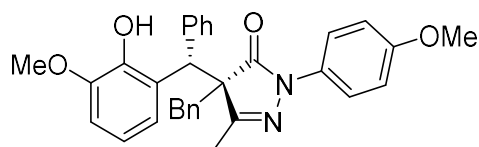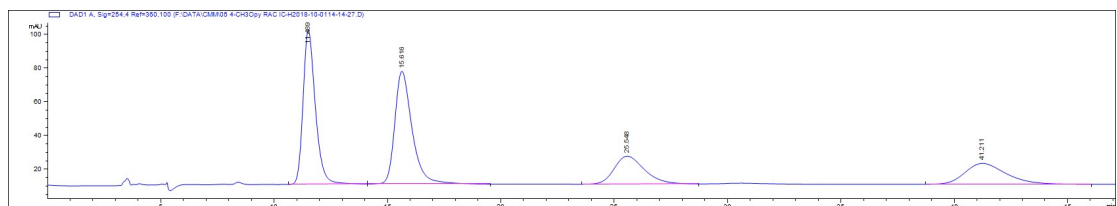

| # | 时间     | 峰面积    | 峰高   | 峰宽     | 对称因子  | 峰面积 %  | 类型 |
|---|--------|--------|------|--------|-------|--------|----|
| 1 | 11.489 | 3435.3 | 91.1 | 0.5722 | 0.693 | 34.169 | BB |
| 2 | 15.616 | 3532.9 | 66.6 | 0.7968 | 0.649 | 35.139 | BB |
| 3 | 25.548 | 1529.5 | 16.5 | 1.3534 | 0.723 | 15.213 | BB |
| 4 | 41.211 | 1556.4 | 12.3 | 1.7719 | 0.711 | 15.480 | BB |

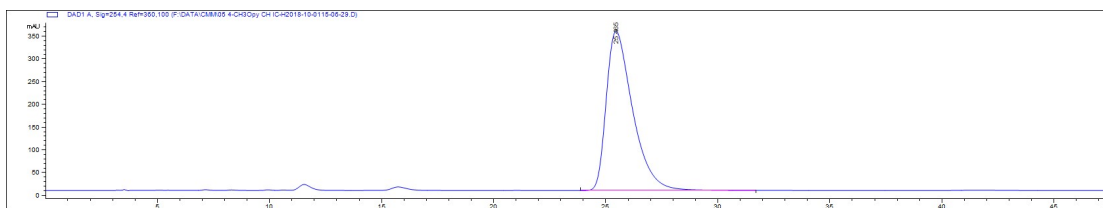

| # | 时间     | 峰面积   | 峰高    | 峰宽     | 对称因子  | 峰面积 %   | 类型 |
|---|--------|-------|-------|--------|-------|---------|----|
| 1 | 25.465 | 28768 | 350.9 | 1.2505 | 0.542 | 100.000 | BB |

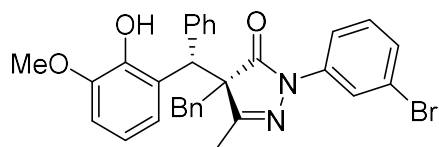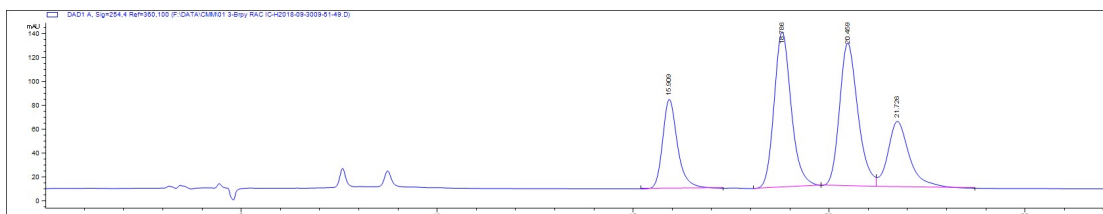

| # | 时间     | 峰面积    | 峰高    | 峰宽     | 对称因子  | 峰面积 %  | 类型 |
|---|--------|--------|-------|--------|-------|--------|----|
| 1 | 15.909 | 1992.4 | 75    | 0.3999 | 0.75  | 16.667 | BB |
| 2 | 18.786 | 3960.3 | 130.6 | 0.4618 | 0.832 | 33.130 | BB |
| 3 | 20.459 | 3915.9 | 119.9 | 0.499  | 0.758 | 32.758 | BV |
| 4 | 21.726 | 2085.4 | 55    | 0.5664 | 0.722 | 17.445 | VB |

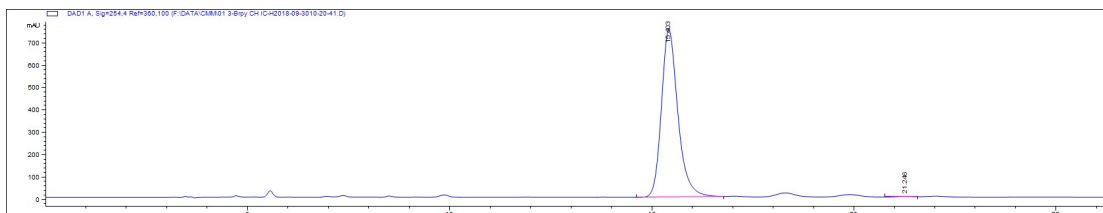

| # | 时间     | 峰面积     | 峰高  | 峰宽     | 对称因子  | 峰面积 %  | 类型 |
|---|--------|---------|-----|--------|-------|--------|----|
| 1 | 15.403 | 21087.3 | 746 | 0.4298 | 0.76  | 99.787 | BB |
| 2 | 21.246 | 45      | 1.8 | 0.4005 | 1.454 | 0.213  | BB |

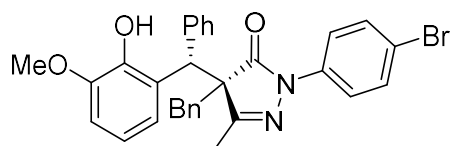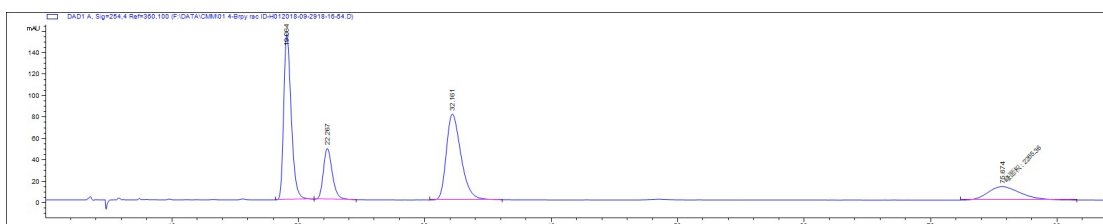

| # | 时间     | 峰面积    | 峰高    | 峰宽     | 对称因子  | 峰面积 %  | 类型 |
|---|--------|--------|-------|--------|-------|--------|----|
| 1 | 19.064 | 6425.6 | 154.8 | 0.6362 | 0.669 | 36.707 | BB |
| 2 | 22.267 | 2345.6 | 47.6  | 0.7532 | 0.752 | 13.399 | BB |
| 3 | 32.161 | 6468.6 | 80.2  | 1.2309 | 0.666 | 36.952 | BB |
| 4 | 75.674 | 2265.4 | 12.5  | 3.0117 | 0.784 | 12.941 | MM |

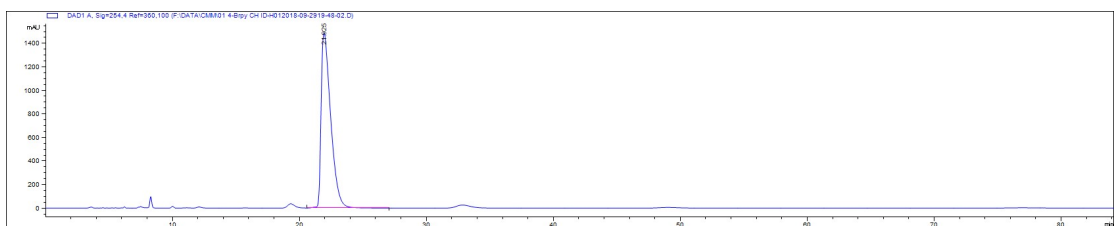

| # | 时间     | 峰面积     | 峰高     | 峰宽     | 对称因子  | 峰面积 %   | 类型 |
|---|--------|---------|--------|--------|-------|---------|----|
| 1 | 21.925 | 77867.3 | 1489.9 | 0.7977 | 0.411 | 100.000 | BB |

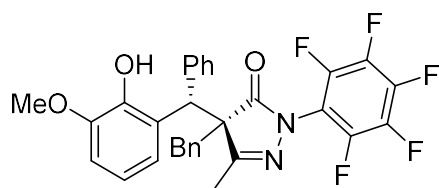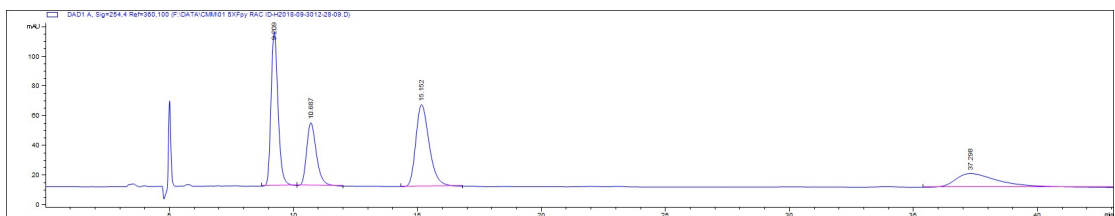

| # | 时间     | 峰面积    | 峰高   | 峰宽     | 对称因子  | 峰面积 %  | 类型  |
|---|--------|--------|------|--------|-------|--------|-----|
| 1 | 9.209  | 2046.7 | 104  | 0.3035 | 0.769 | 31.712 | BB  |
| 2 | 10.687 | 1168.2 | 42.4 | 0.4232 | 0.71  | 18.101 | BB  |
| 3 | 15.152 | 2088.7 | 55.3 | 0.581  | 0.707 | 32.363 | BB  |
| 4 | 37.298 | 1150.3 | 9.3  | 1.6725 | 0.491 | 17.824 | BBA |

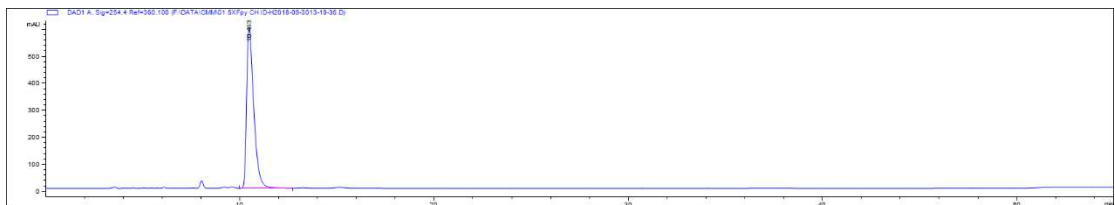

| # | 时间     | 峰面积     | 峰高    | 峰宽   | 对称因子  | 峰面积 %   | 类型 |
|---|--------|---------|-------|------|-------|---------|----|
| 1 | 10.463 | 15192.5 | 590.8 | 0.39 | 0.501 | 100.000 | BB |

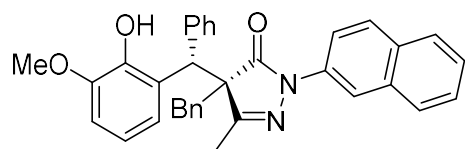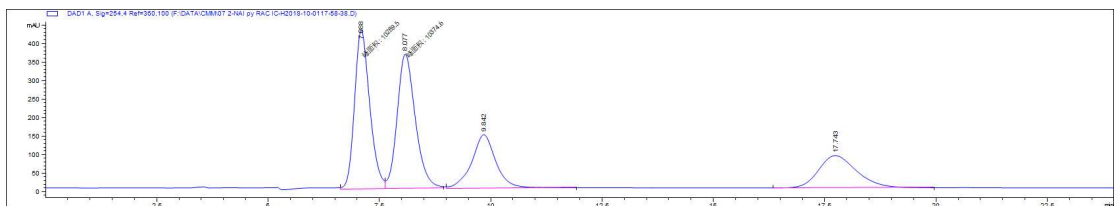

| # | 时间     | 峰面积     | 峰高    | 峰宽     | 对称因子  | 峰面积 %  | 类型 |
|---|--------|---------|-------|--------|-------|--------|----|
| 1 | 7.088  | 10289.5 | 430.4 | 0.3984 | 0.774 | 32.772 | MF |
| 2 | 8.077  | 10374.6 | 363.8 | 0.4753 | 0.782 | 33.043 | FM |
| 3 | 9.842  | 5547.1  | 145   | 0.5562 | 0.969 | 17.667 | VB |
| 4 | 17.743 | 5186.4  | 87.2  | 0.9081 | 0.749 | 16.518 | BB |

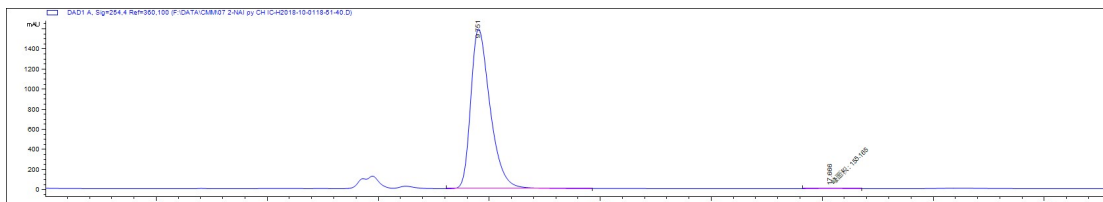

| # | 时间     | 峰面积     | 峰高     | 峰宽     | 对称因子  | 峰面积 %  | 类型 |
|---|--------|---------|--------|--------|-------|--------|----|
| 1 | 9.751  | 48192.6 | 1590.3 | 0.4595 | 0.629 | 99.679 | BB |
| 2 | 17.666 | 155.2   | 3.1    | 0.8247 | 0.733 | 0.321  | MM |

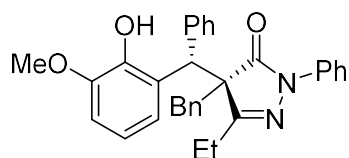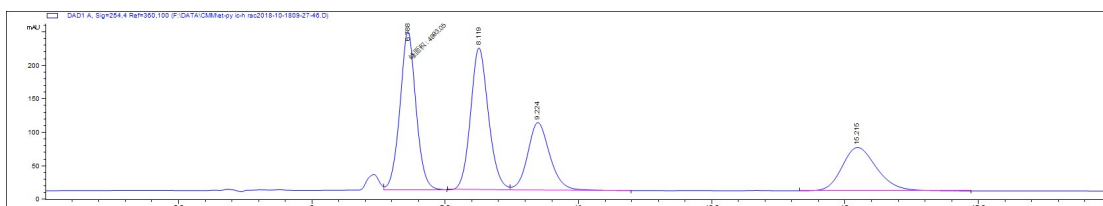

| # | 时间     | 峰面积    | 峰高    | 峰宽     | 对称因子  | 峰面积 %  | 类型 |
|---|--------|--------|-------|--------|-------|--------|----|
| 1 | 6.788  | 4993.1 | 236.6 | 0.3517 | 0.957 | 31.660 | MM |
| 2 | 8.119  | 4950.3 | 211.6 | 0.357  | 0.843 | 31.388 | BV |
| 3 | 9.224  | 2910.7 | 100.7 | 0.4393 | 0.812 | 18.456 | VB |
| 4 | 15.215 | 2917   | 64.5  | 0.6957 | 0.771 | 18.496 | BB |

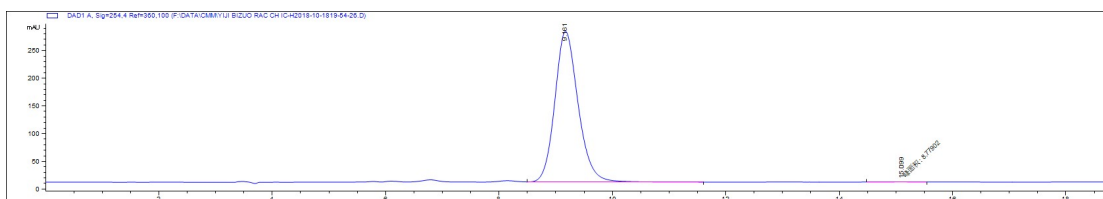

| # | 时间     | 峰面积    | 峰高     | 峰宽     | 对称因子  | 峰面积 %  | 类型 |
|---|--------|--------|--------|--------|-------|--------|----|
| 1 | 9.161  | 7728.5 | 271.5  | 0.4341 | 0.8   | 99.887 | BB |
| 2 | 15.099 | 8.8    | 2.6E-1 | 0.4205 | 1.635 | 0.113  | MM |

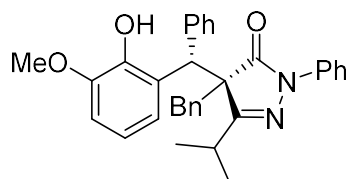

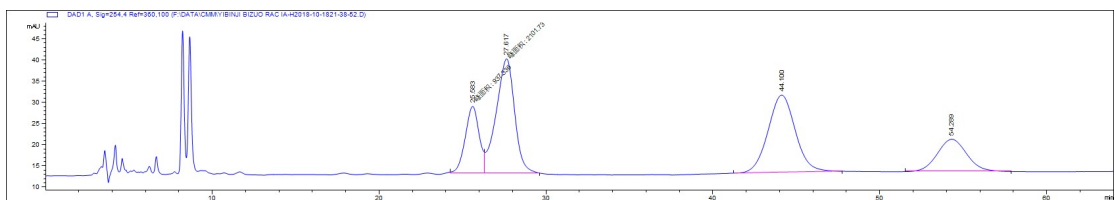

| # | 时间     | 峰面积    | 峰高   | 峰宽     | 对称因子  | 峰面积 %  | 类型 |
|---|--------|--------|------|--------|-------|--------|----|
| 1 | 25.583 | 937.3  | 15.9 | 0.9827 | 1.11  | 15.481 | MF |
| 2 | 27.617 | 2101.7 | 27.2 | 1.2901 | 1.239 | 34.712 | FM |
| 3 | 44.1   | 2074.9 | 18.2 | 1.6414 | 0.966 | 34.269 | BB |
| 4 | 54.289 | 940.8  | 7.6  | 1.5486 | 0.946 | 15.539 | BB |

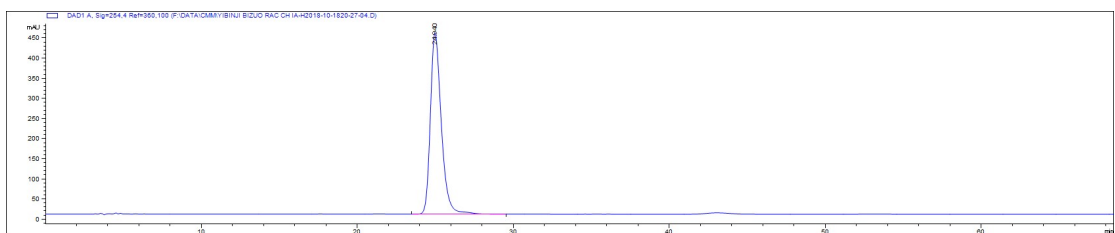

| # | 时间    | 峰面积     | 峰高    | 峰宽     | 对称因子  | 峰面积 %   | 类型 |
|---|-------|---------|-------|--------|-------|---------|----|
| 1 | 24.94 | 21671.8 | 450.3 | 0.8022 | 0.716 | 100.000 | MF |

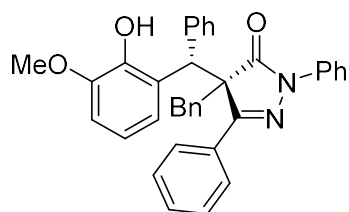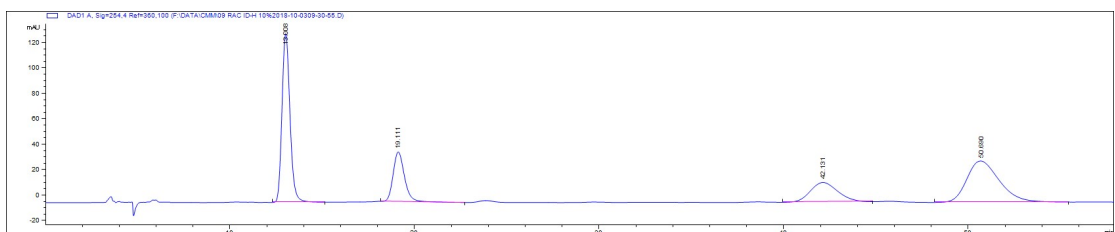

| # | 时间     | 峰面积    | 峰高   | 峰宽     | 对称因子  | 峰面积 %  | 类型 |
|---|--------|--------|------|--------|-------|--------|----|
| 1 | 13.008 | 4003.8 | 133  | 0.4652 | 0.811 | 35.556 | BB |
| 2 | 19.111 | 1665.7 | 39.1 | 0.6513 | 0.777 | 14.792 | BB |
| 3 | 42.131 | 1597.4 | 15.4 | 1.5101 | 0.818 | 14.186 | BB |
| 4 | 50.69  | 3993.7 | 32.5 | 1.8358 | 0.713 | 35.466 | BB |

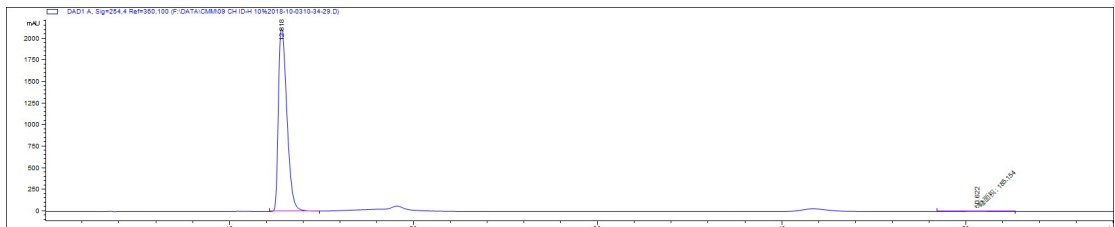

| # | 时间     | 峰面积     | 峰高     | 峰宽     | 对称因子  | 峰面积 %  | 类型 |
|---|--------|---------|--------|--------|-------|--------|----|
| 1 | 12.818 | 67924.8 | 2111.8 | 0.5032 | 0.539 | 99.728 | BB |
| 2 | 50.622 | 185.2   | 1.7    | 1.8107 | 1.072 | 0.272  | MM |

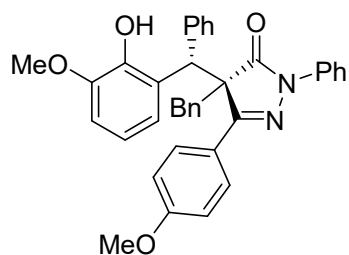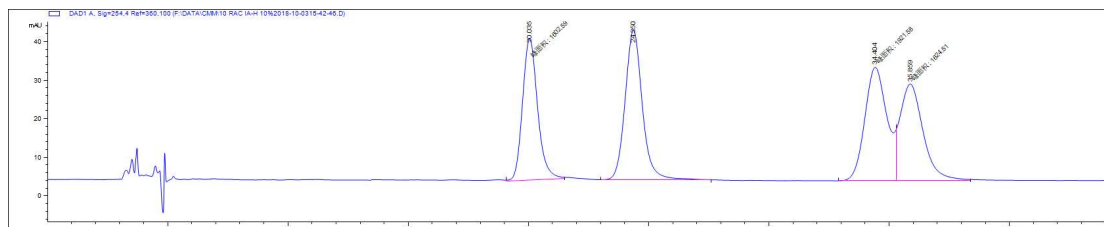

| # | 时间     | 峰面积    | 峰高   | 峰宽     | 对称因子  | 峰面积 %  | 类型 |
|---|--------|--------|------|--------|-------|--------|----|
| 1 | 20.035 | 1602.6 | 36.5 | 0.7309 | 0.864 | 22.665 | MM |
| 2 | 24.35  | 1922.2 | 38.6 | 0.7585 | 0.875 | 27.185 | BB |
| 3 | 34.404 | 1921.6 | 29.3 | 1.0924 | 0     | 27.176 | MF |
| 4 | 35.859 | 1624.5 | 25   | 1.0832 | 0.697 | 22.975 | FM |

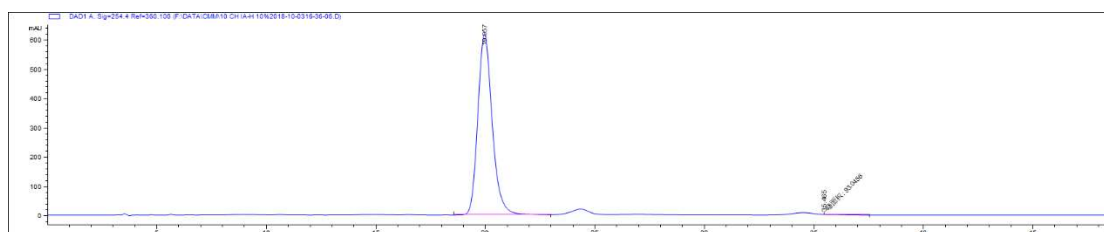

| # | 时间     | 峰面积     | 峰高    | 峰宽     | 对称因子  | 峰面积 %  | 类型 |
|---|--------|---------|-------|--------|-------|--------|----|
| 1 | 19.957 | 28352.6 | 617.5 | 0.7037 | 0.808 | 99.673 | BB |
| 2 | 35.465 | 93      | 1.9   | 0.8122 | 0     | 0.327  | FM |

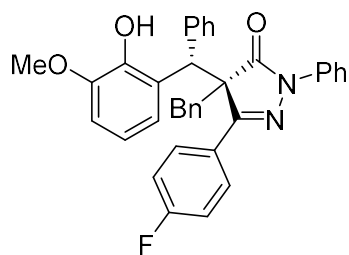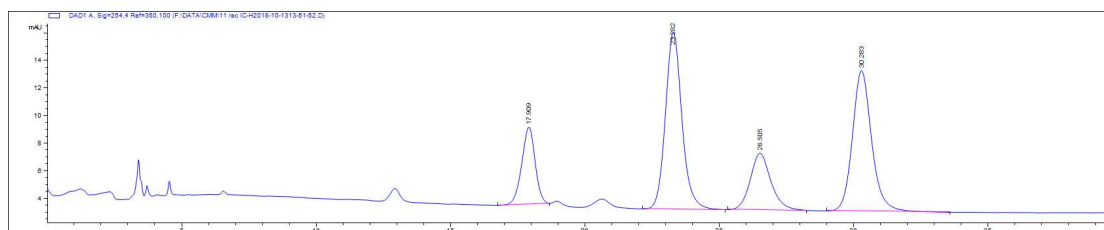

| # | 时间     | 峰面积   | 峰高   | 峰宽     | 对称因子  | 峰面积 %  | 类型 |
|---|--------|-------|------|--------|-------|--------|----|
| 1 | 17.909 | 193.8 | 5.6  | 0.5273 | 1.129 | 13.171 | BB |
| 2 | 23.282 | 546.5 | 12.8 | 0.651  | 0.871 | 37.144 | BB |
| 3 | 26.505 | 222.6 | 4.1  | 0.8017 | 0.82  | 15.129 | BB |
| 4 | 30.283 | 508.4 | 10.2 | 0.7607 | 0.832 | 34.556 | BB |

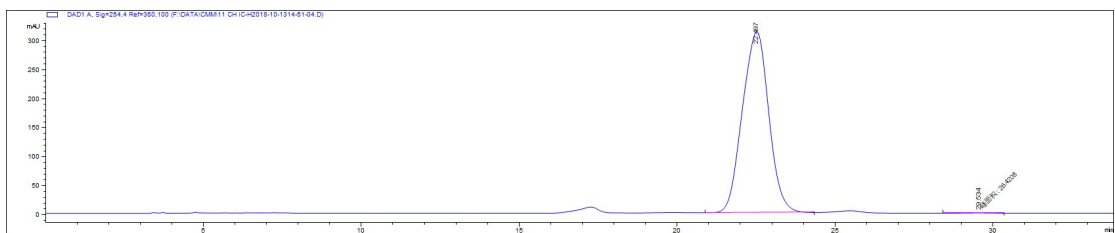

| # | 时间     | 峰面积     | 峰高     | 峰宽     | 对称因子  | 峰面积 %  | 类型 |
|---|--------|---------|--------|--------|-------|--------|----|
| 1 | 22.497 | 18066.2 | 311.4  | 0.9347 | 1.133 | 99.854 | BB |
| 2 | 29.534 | 26.4    | 4.8E-1 | 0.9205 | 1.246 | 0.146  | MM |

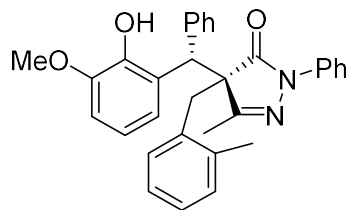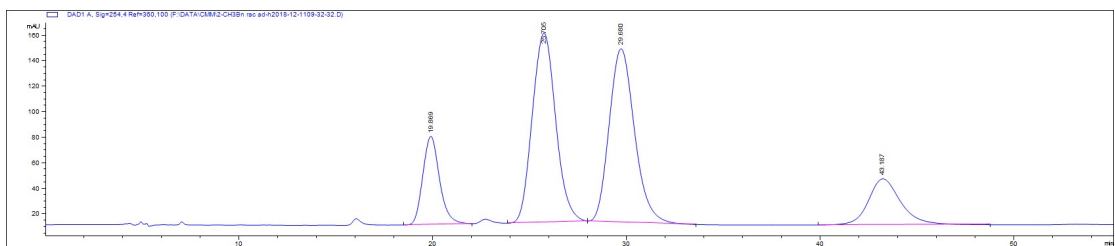

| # | 时间     | 峰面积     | 峰高    | 峰宽     | 对称因子  | 峰面积 %  | 类型 |
|---|--------|---------|-------|--------|-------|--------|----|
| 1 | 19.869 | 4150.4  | 69.2  | 0.9296 | 0.87  | 12.492 | BB |
| 2 | 25.705 | 12465.6 | 148.5 | 1.3313 | 0.948 | 37.518 | BB |
| 3 | 29.68  | 12388.3 | 136.2 | 1.4151 | 0.825 | 37.286 | BB |
| 4 | 43.187 | 4220.9  | 36.2  | 1.7383 | 0.772 | 12.704 | BB |

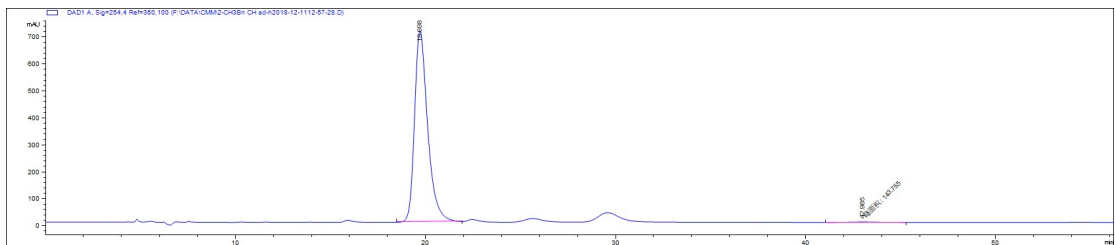

| # | 时间     | 峰面积     | 峰高    | 峰宽     | 对称因子  | 峰面积 %  | 类型 |
|---|--------|---------|-------|--------|-------|--------|----|
| 1 | 19.698 | 34026.7 | 709.7 | 0.7274 | 0.668 | 99.579 | BB |
| 2 | 42.985 | 143.8   | 1.4   | 1.723  | 0.797 | 0.421  | MM |

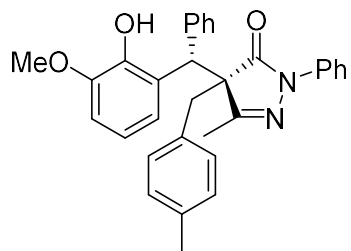

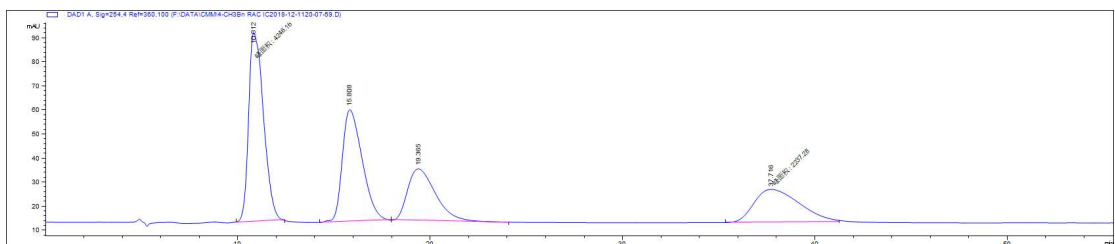

| # | 时间     | 峰面积    | 峰高   | 峰宽     | 对称因子  | 峰面积 %  | 类型 |
|---|--------|--------|------|--------|-------|--------|----|
| 1 | 10.812 | 4246.2 | 78.6 | 0.8999 | 0.522 | 35.309 | MM |
| 2 | 15.808 | 3361.9 | 46.6 | 1.1255 | 0.588 | 27.956 | BB |
| 3 | 19.365 | 2180.2 | 21.6 | 1.5179 | 0.585 | 18.130 | BB |
| 4 | 37.716 | 2237.3 | 13.7 | 2.7267 | 0.603 | 18.604 | MM |

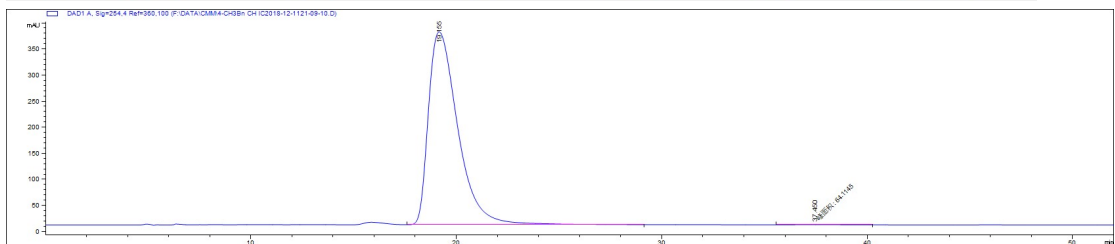

| # | 时间     | 峰面积   | 峰高    | 峰宽     | 对称因子  | 峰面积 %  | 类型 |
|---|--------|-------|-------|--------|-------|--------|----|
| 1 | 19.155 | 36806 | 370.3 | 1.5336 | 0.527 | 99.826 | BB |
| 2 | 37.45  | 64.1  | 4E-1  | 2.6429 | 0.552 | 0.174  | MM |

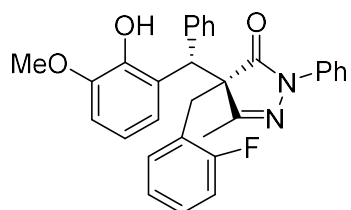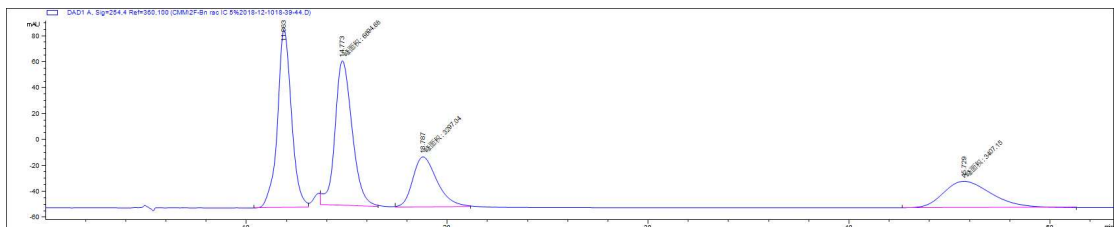

| # | 时间     | 峰面积    | 峰高    | 峰宽     | 对称因子  | 峰面积 %  | 类型 |
|---|--------|--------|-------|--------|-------|--------|----|
| 1 | 11.863 | 6702.1 | 137.2 | 0.744  | 0.858 | 32.738 | BV |
| 2 | 14.773 | 6694.7 | 111.9 | 0.9967 | 0.754 | 32.702 | MM |
| 3 | 18.787 | 3297   | 38.9  | 1.4119 | 0.707 | 16.105 | MM |
| 4 | 45.729 | 3778.1 | 21.5  | 2.9268 | 0.722 | 18.455 | MM |

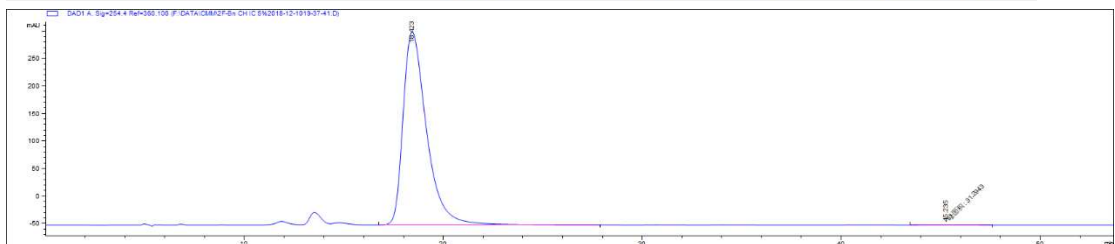

| # | 时间     | 峰面积     | 峰高     | 峰宽     | 对称因子  | 峰面积 %  | 类型 |
|---|--------|---------|--------|--------|-------|--------|----|
| 1 | 18.423 | 28857.6 | 351.6  | 1.2435 | 0.579 | 99.892 | BB |
| 2 | 45.235 | 31.3    | 2.1E-1 | 2.4489 | 0.681 | 0.108  | MM |

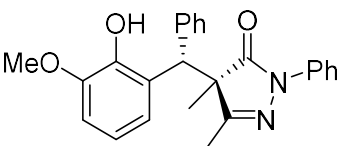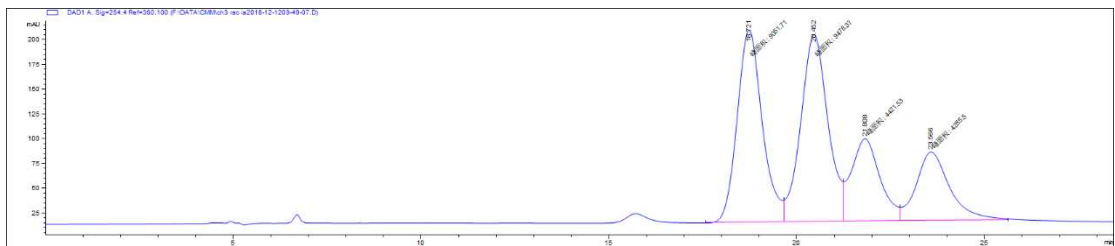

| # | 时间     | 峰面积    | 峰高    | 峰宽     | 对称因子  | 峰面积 %  | 类型 |
|---|--------|--------|-------|--------|-------|--------|----|
| 1 | 18.721 | 9051.7 | 193.9 | 0.778  | 0     | 33.233 | MF |
| 2 | 20.452 | 9478.4 | 188.5 | 0.8382 | 0.927 | 34.799 | MF |
| 3 | 21.808 | 4421.5 | 83    | 0.8881 | 0.862 | 16.233 | MF |
| 4 | 23.566 | 4285.5 | 68.9  | 1.0368 | 0.771 | 15.734 | FM |

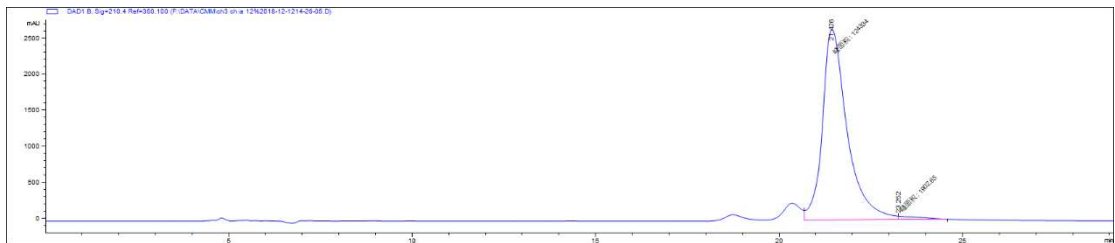

| # | 时间     | 峰面积      | 峰高   | 峰宽     | 对称因子  | 峰面积 %  | 类型 |
|---|--------|----------|------|--------|-------|--------|----|
| 1 | 21.426 | 124334.2 | 2638 | 0.7855 | 0.609 | 98.493 | MF |
| 2 | 23.252 | 1902.7   | 45.9 | 0.691  | 0     | 1.507  | FM |

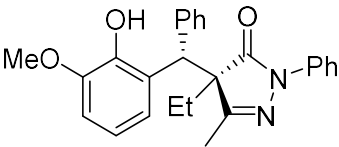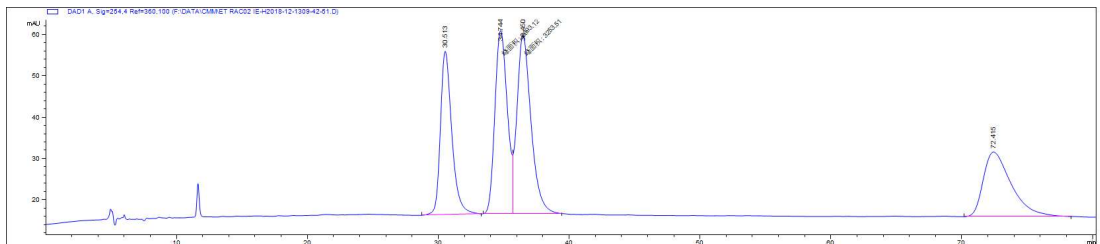

| # | 时间     | 峰面积    | 峰高   | 峰宽     | 对称因子  | 峰面积 %  | 类型 |
|---|--------|--------|------|--------|-------|--------|----|
| 1 | 30.513 | 2404   | 39.7 | 0.9268 | 0.689 | 21.885 | BB |
| 2 | 34.744 | 2993.1 | 44.6 | 1.118  | 0     | 27.247 | MF |
| 3 | 36.45  | 3253.5 | 43.6 | 1.2435 | 0.681 | 29.618 | FM |
| 4 | 72.415 | 2334.4 | 15.7 | 2.0249 | 0.544 | 21.250 | BB |

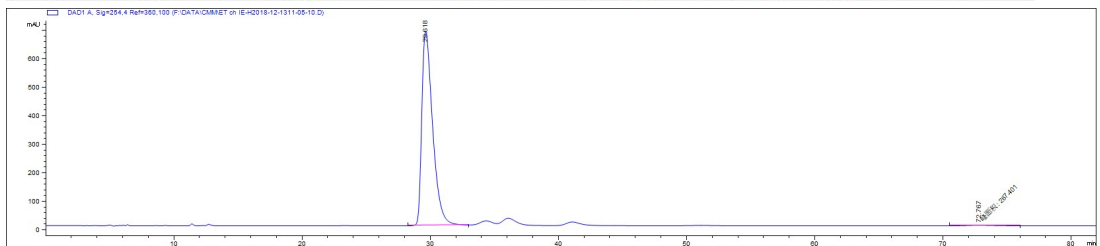

| # | 时间     | 峰面积   | 峰高    | 峰宽     | 对称因子  | 峰面积 %  | 类型 |
|---|--------|-------|-------|--------|-------|--------|----|
| 1 | 29.618 | 40259 | 683.4 | 0.8973 | 0.513 | 99.340 | BB |
| 2 | 72.767 | 267.4 | 1.8   | 2.4725 | 0.763 | 0.660  | MM |

## 5. NMR spectra of products 3

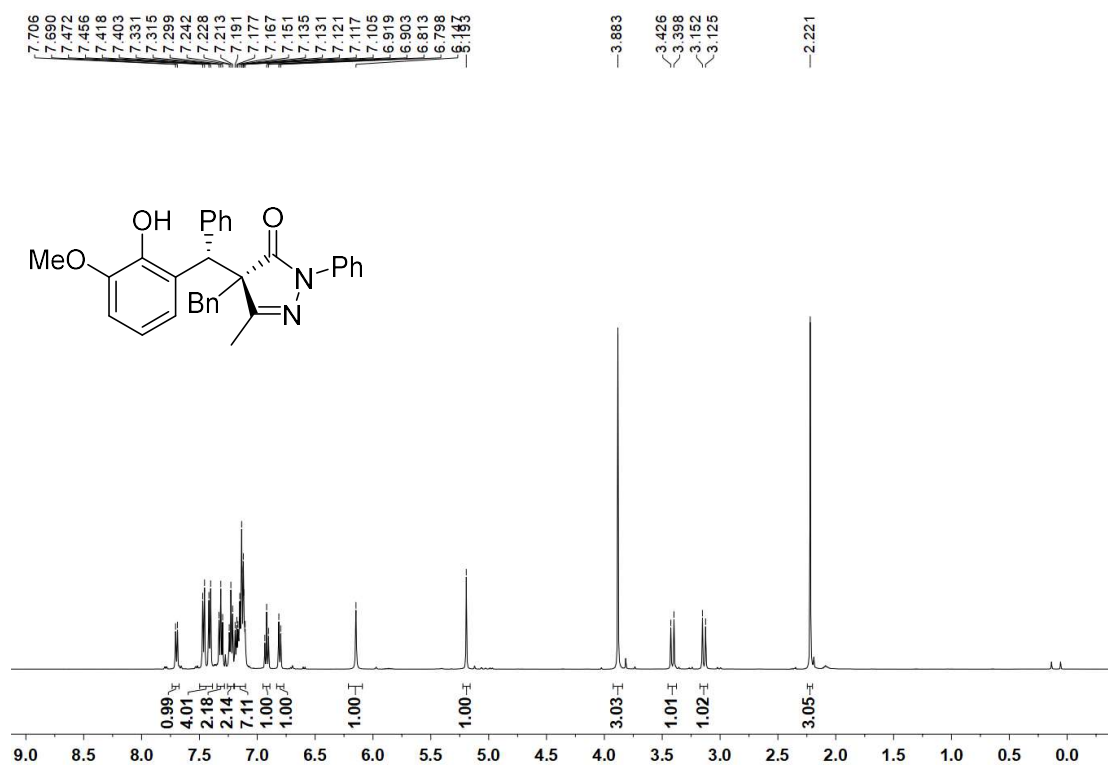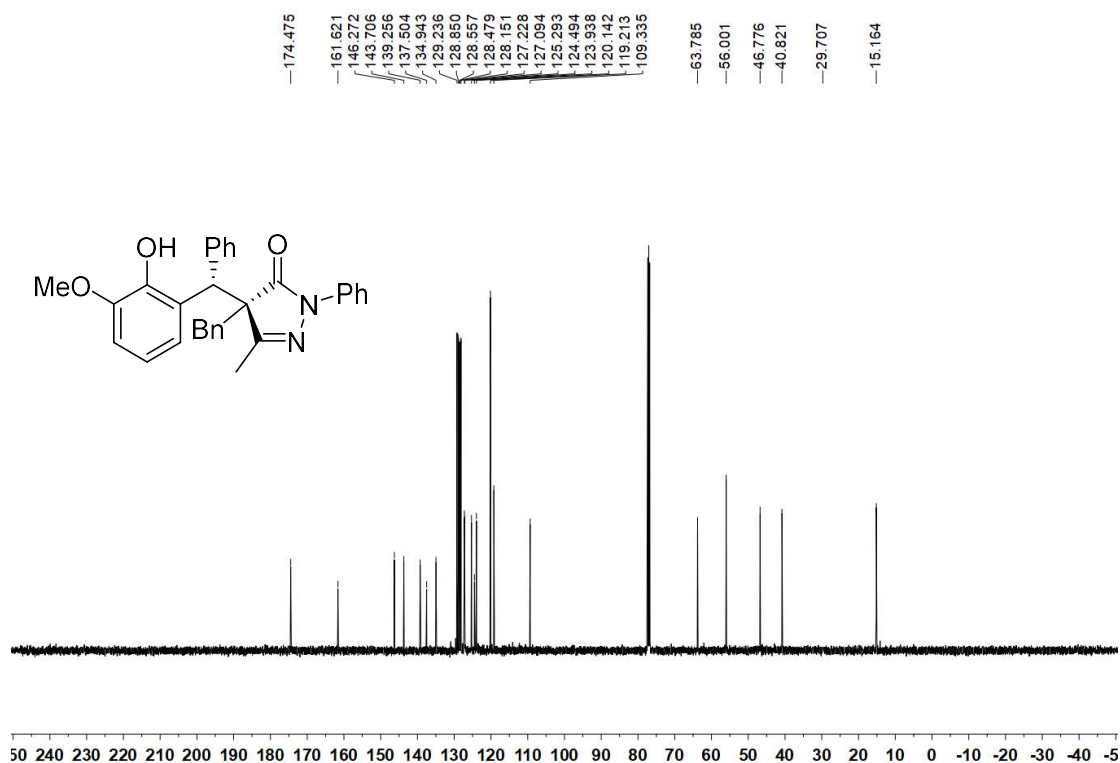

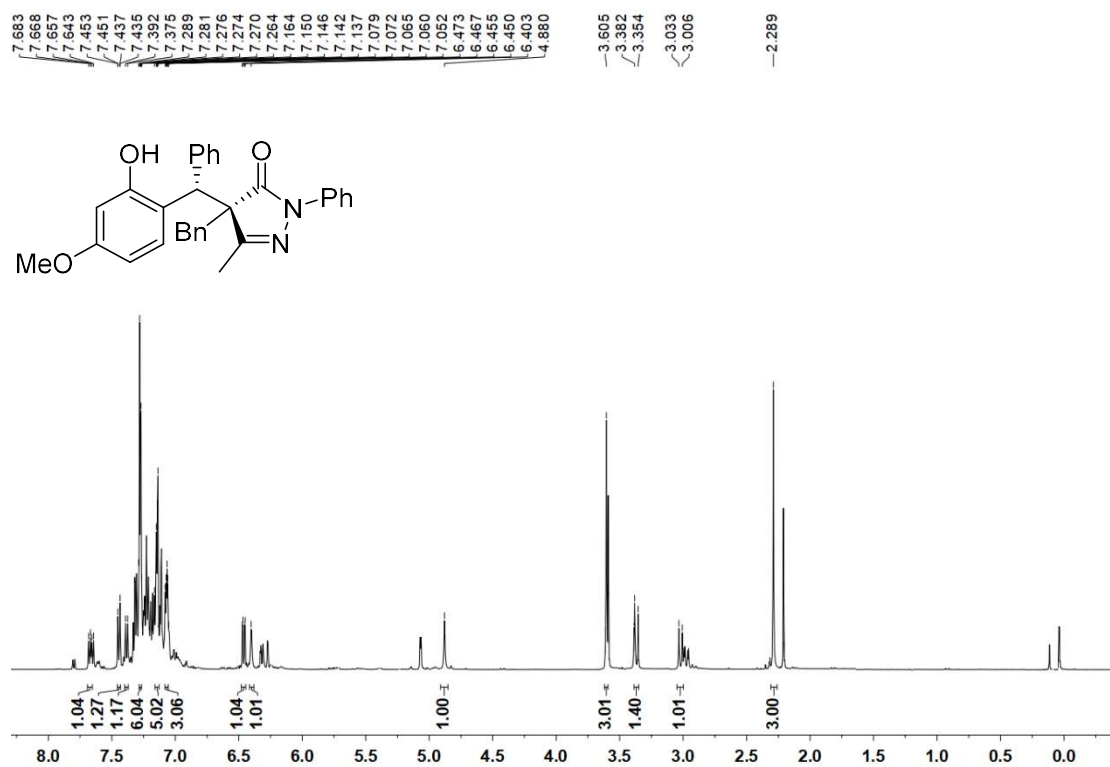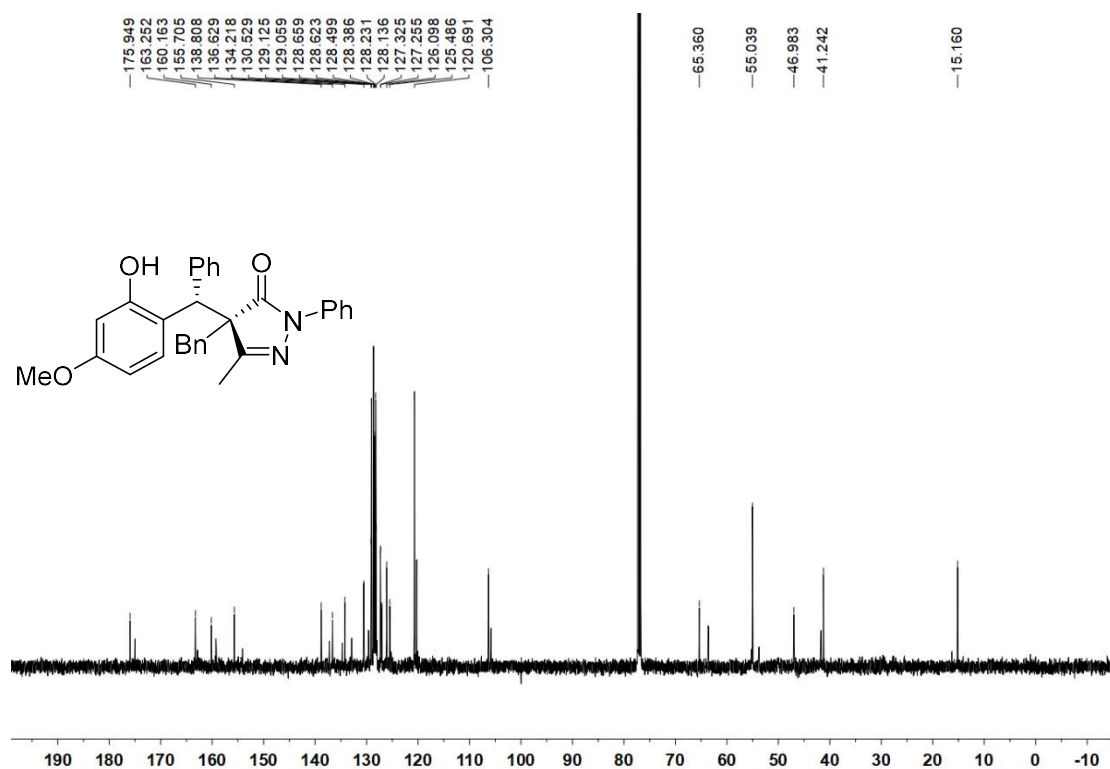

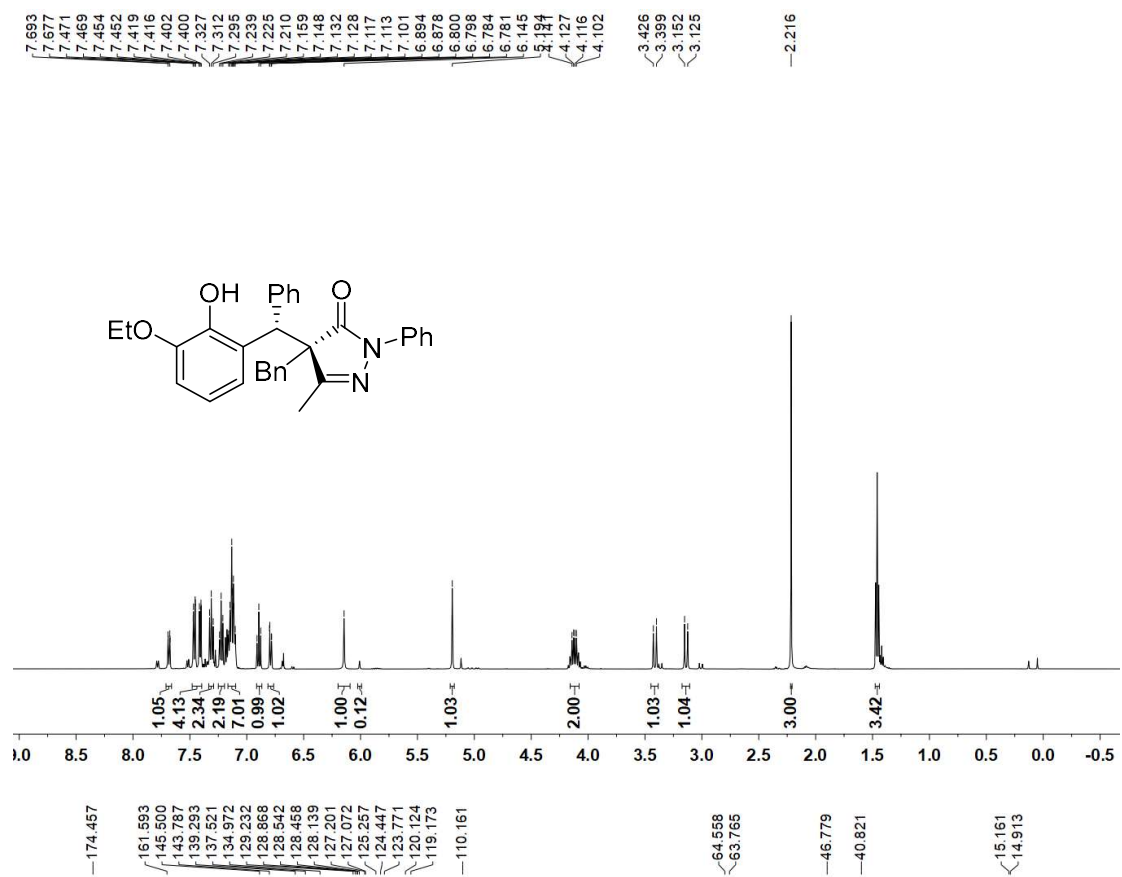

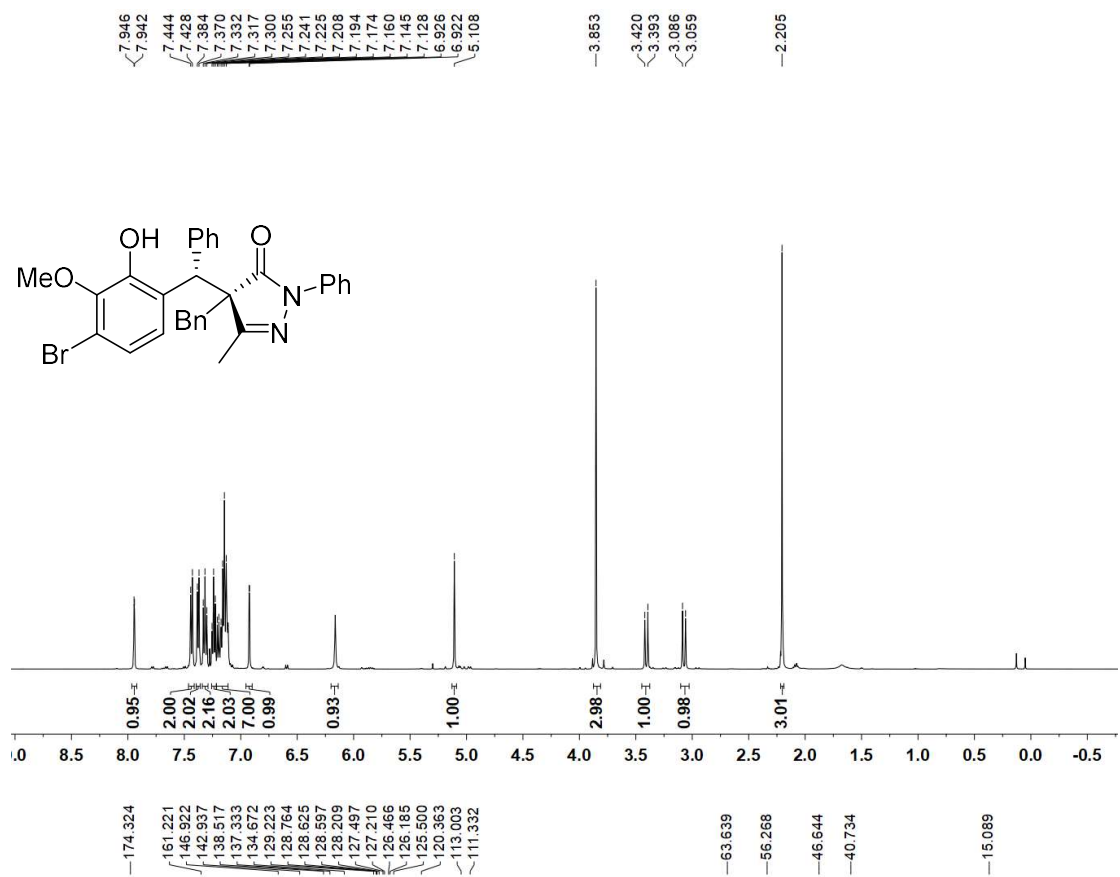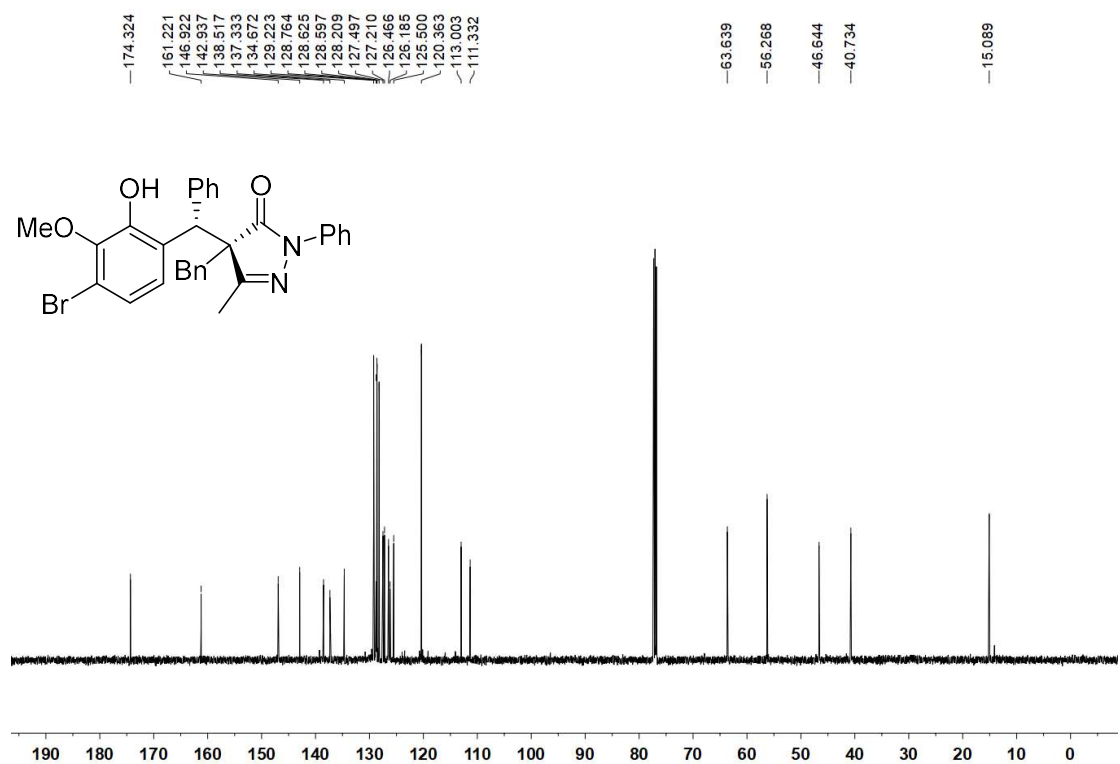

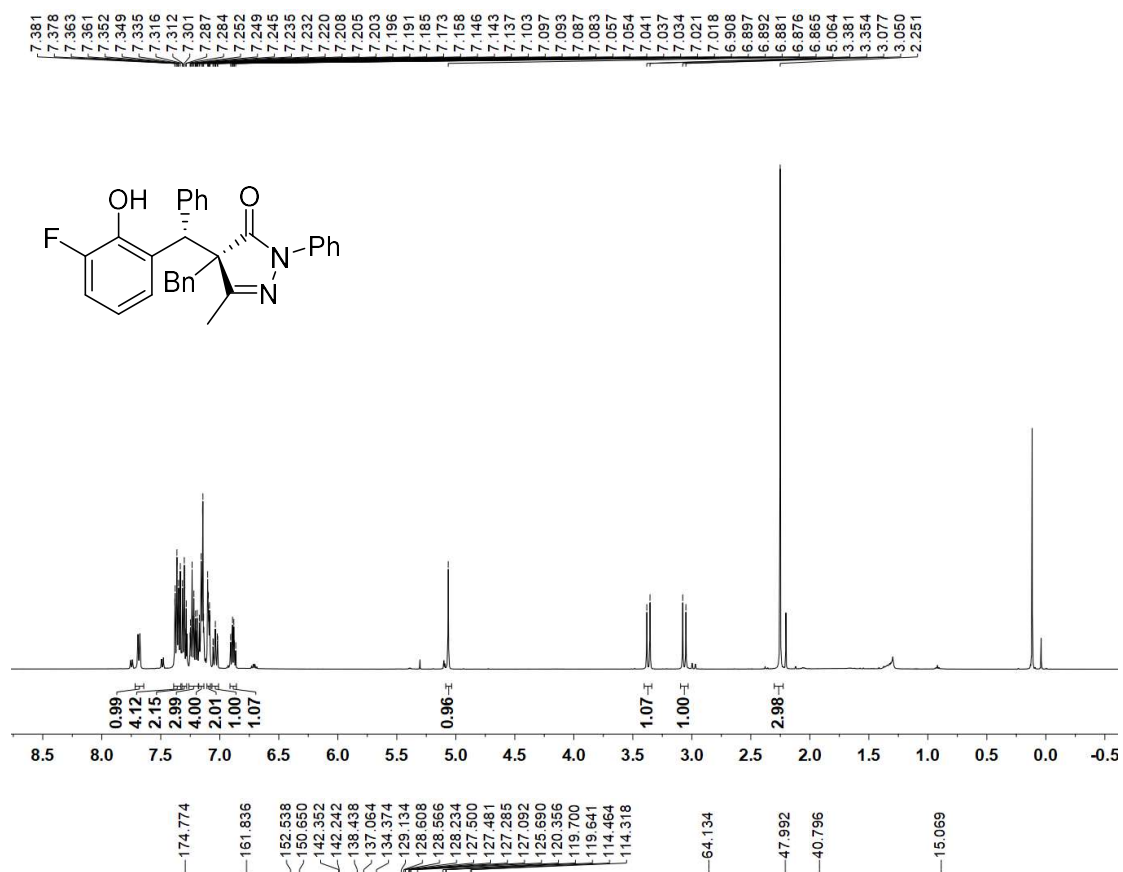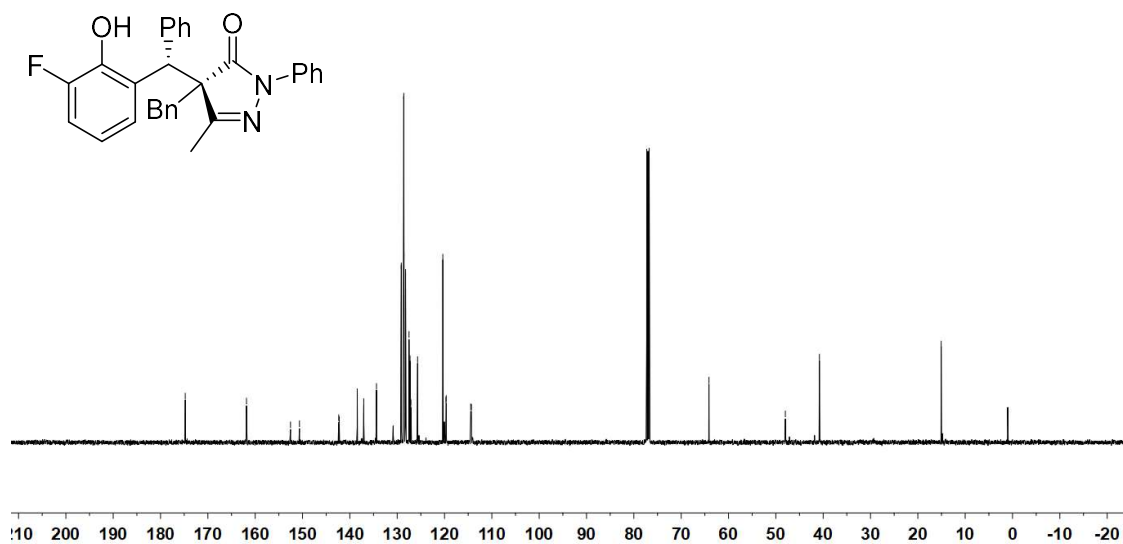

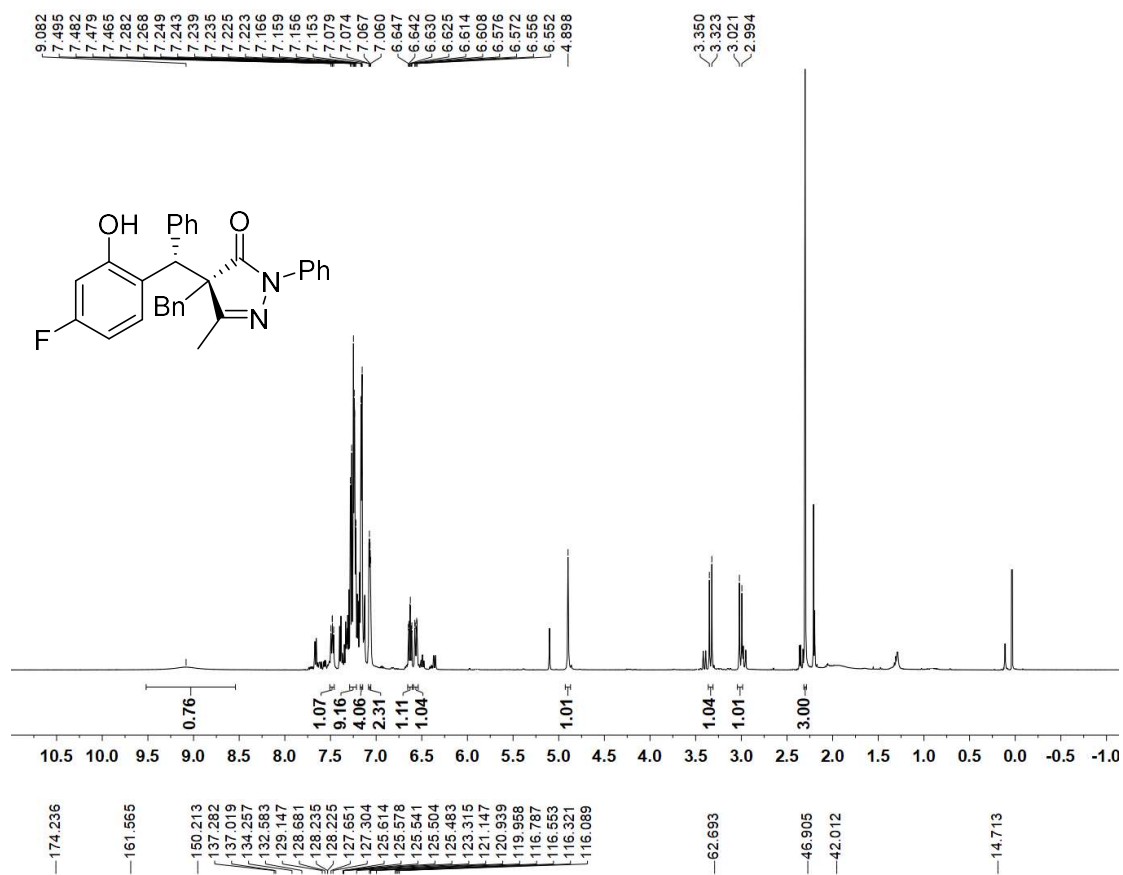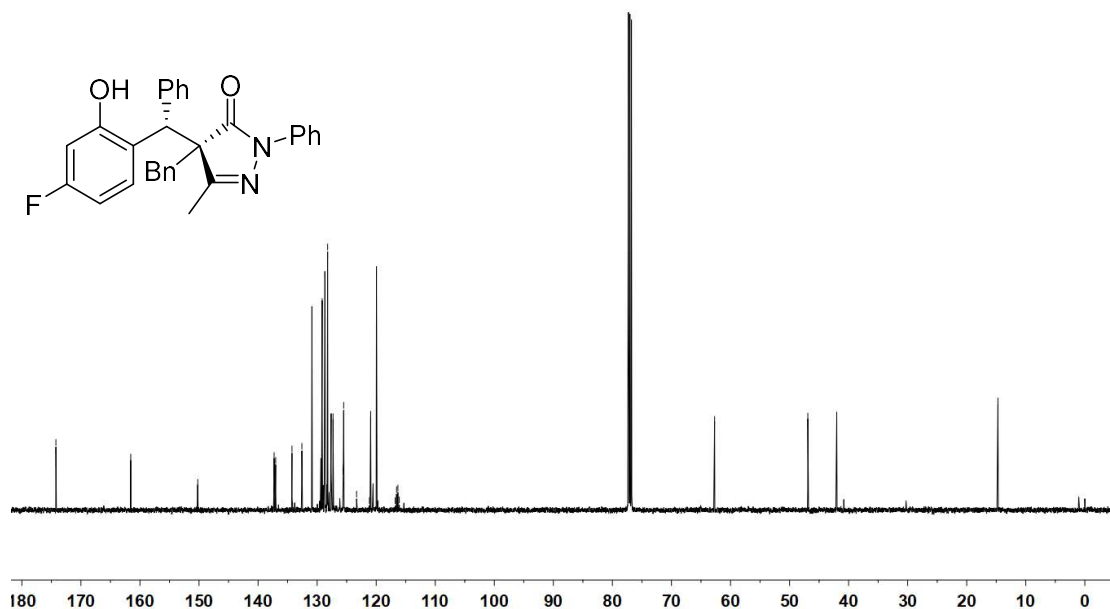

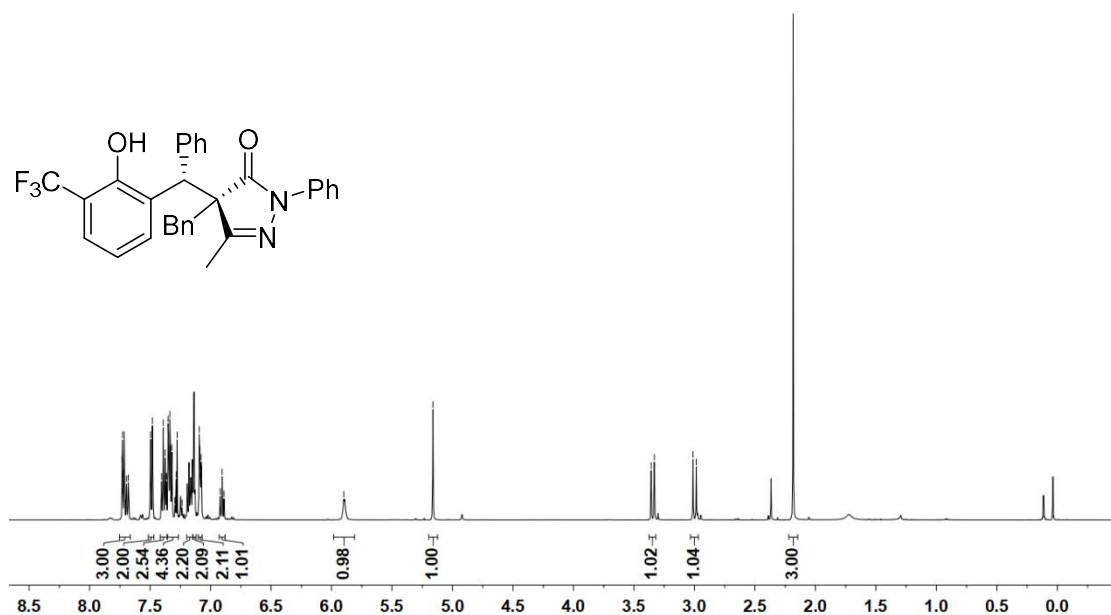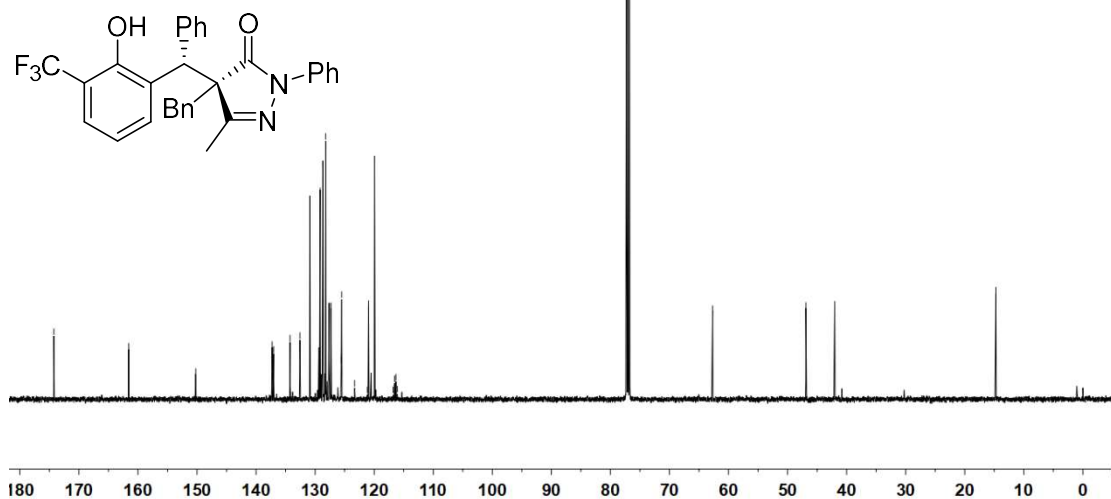

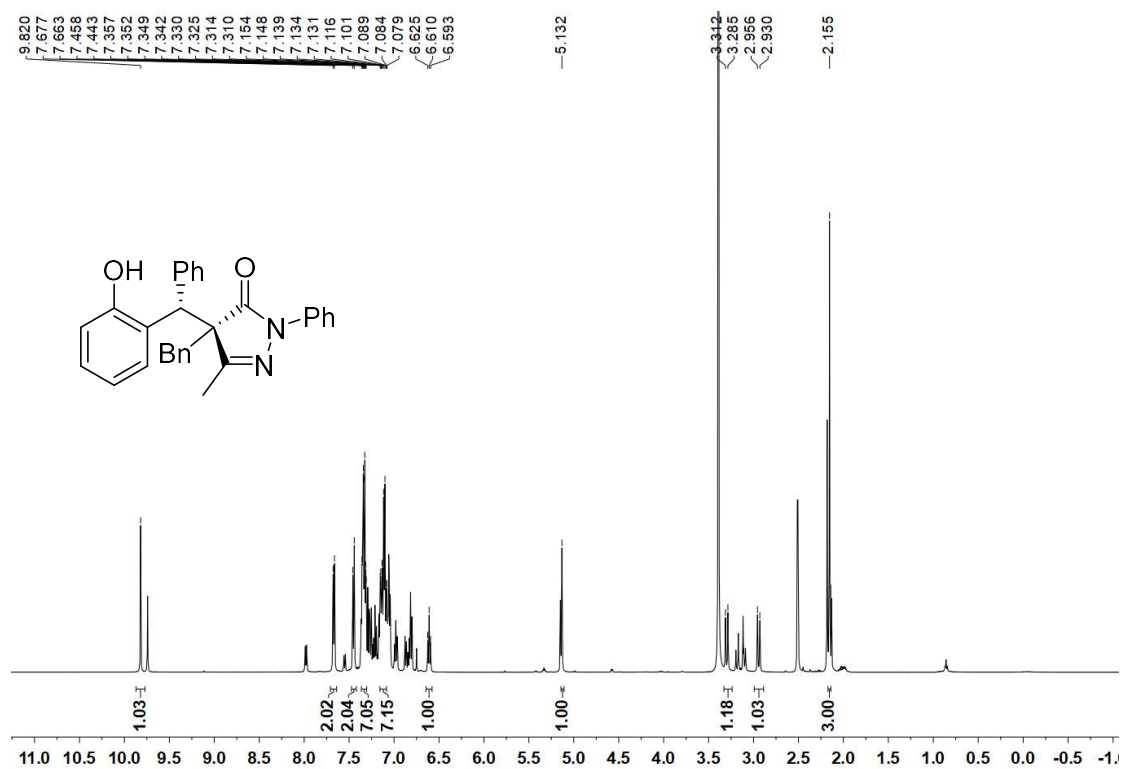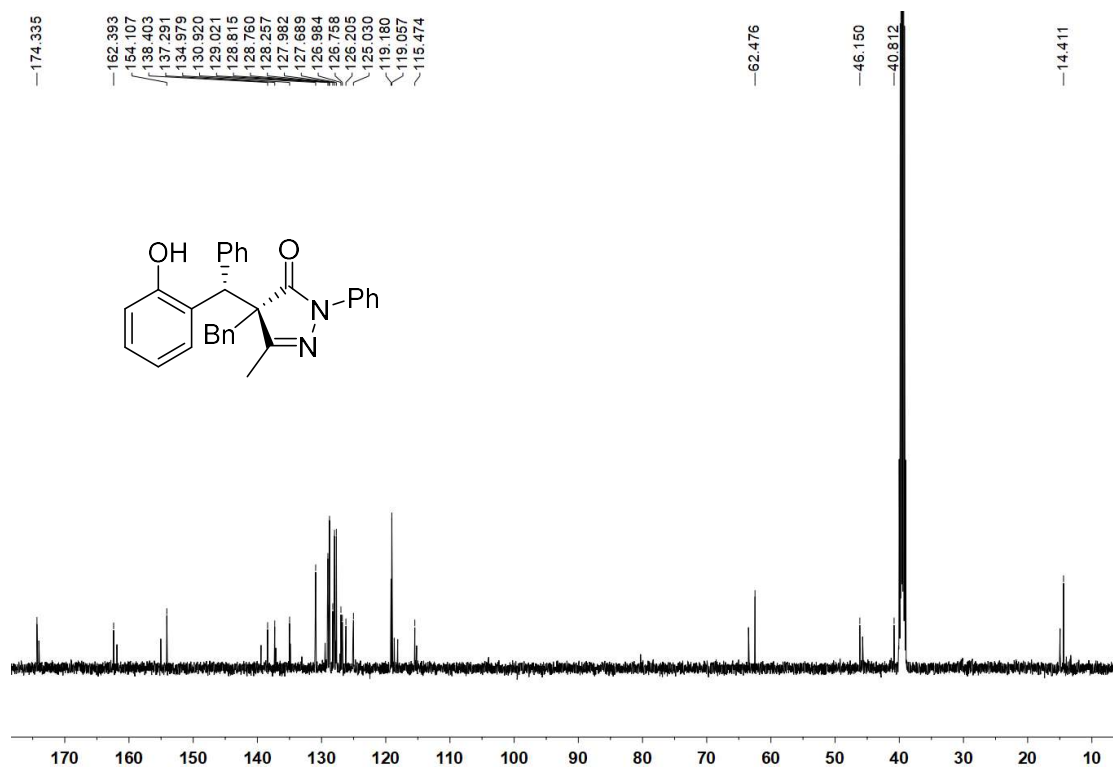

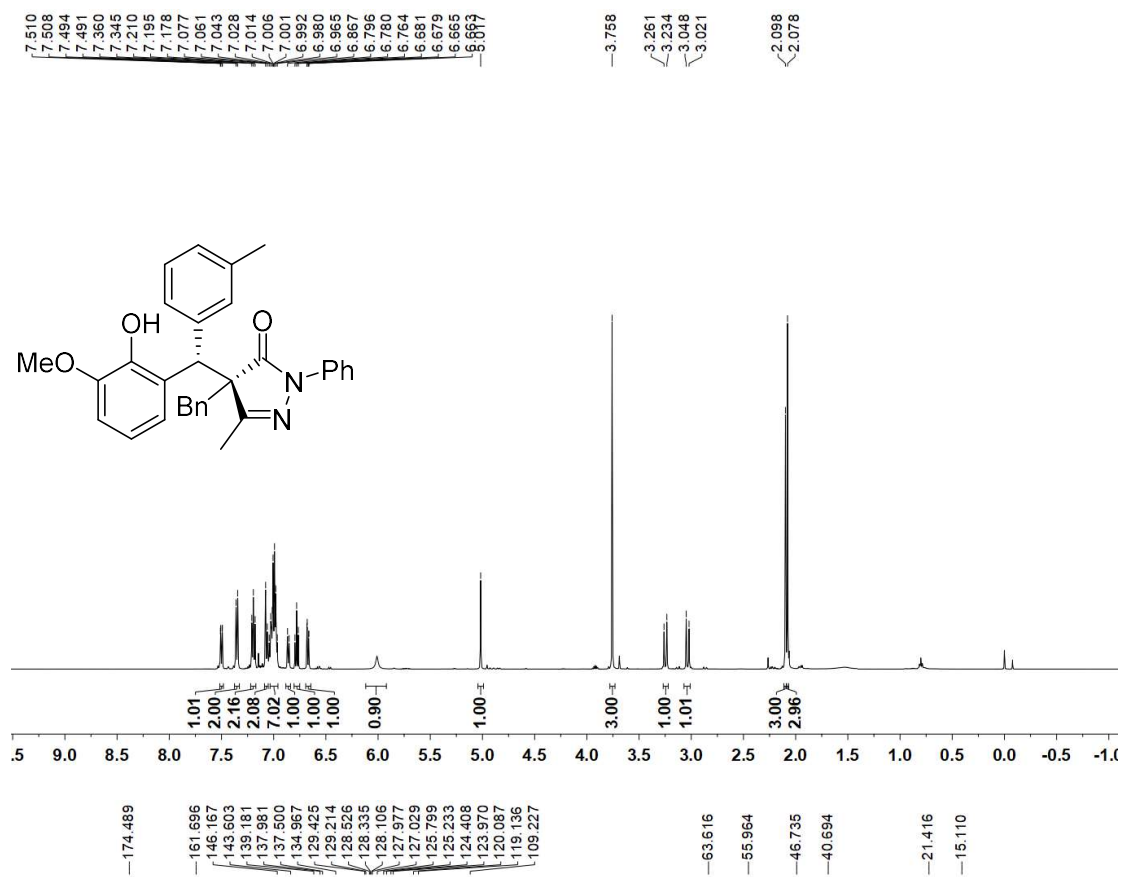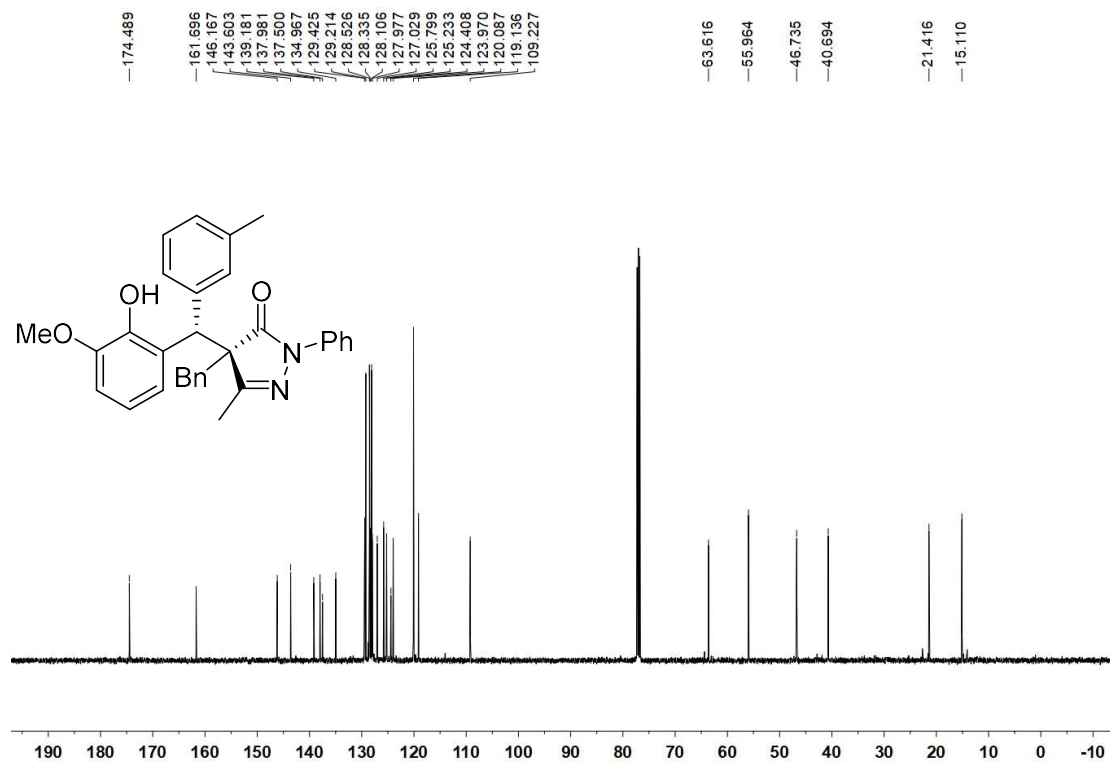

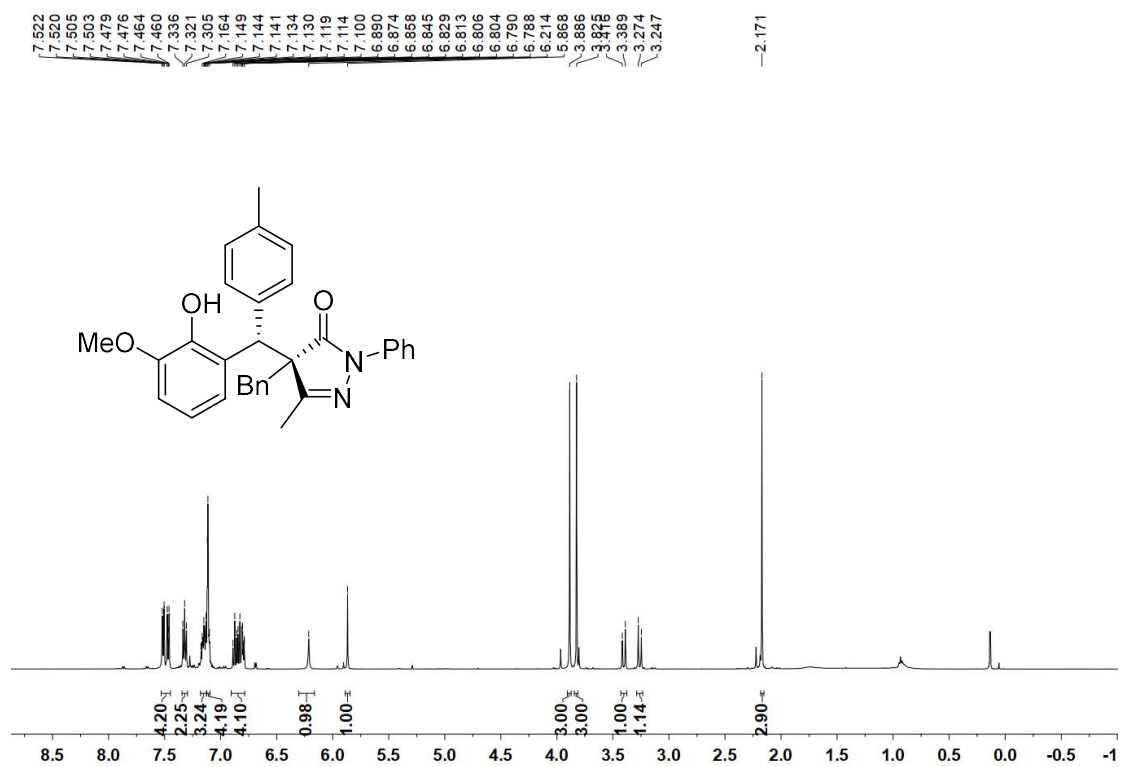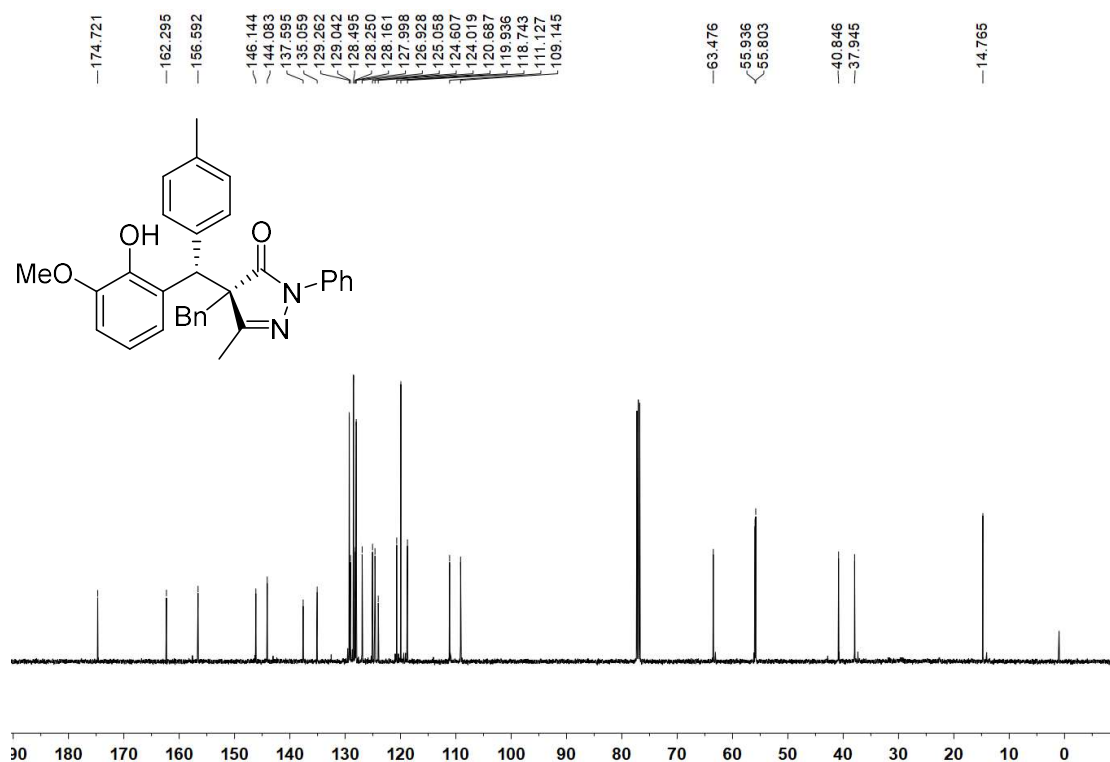

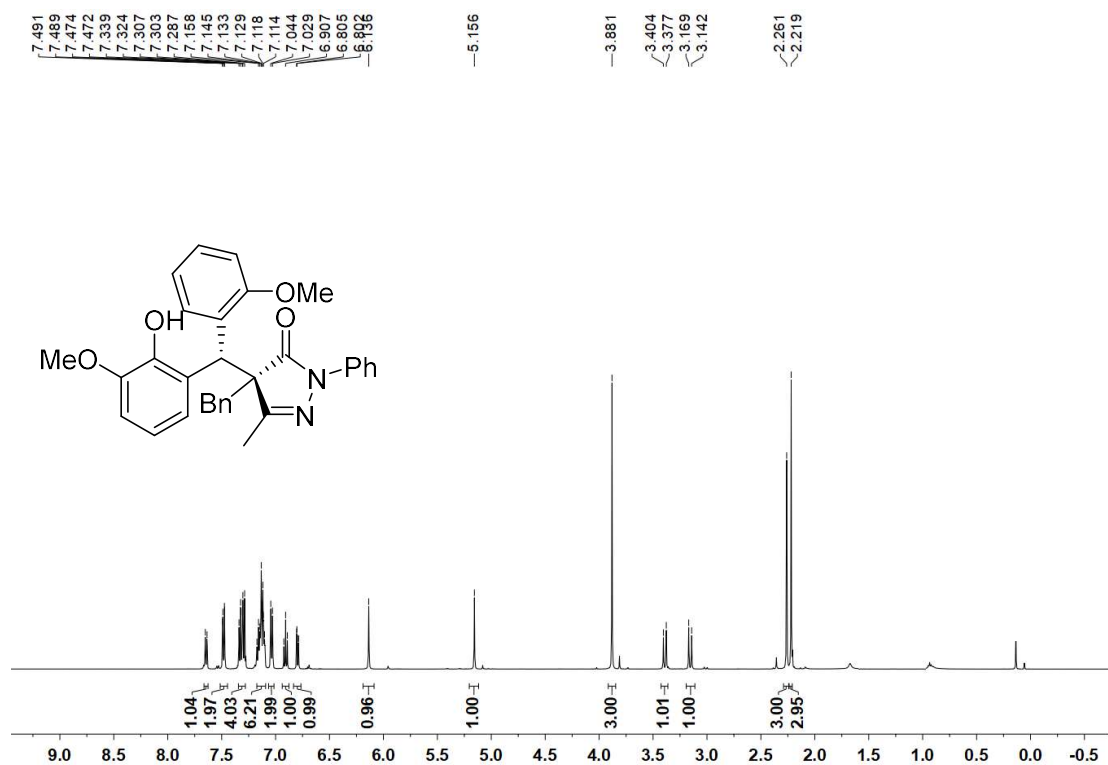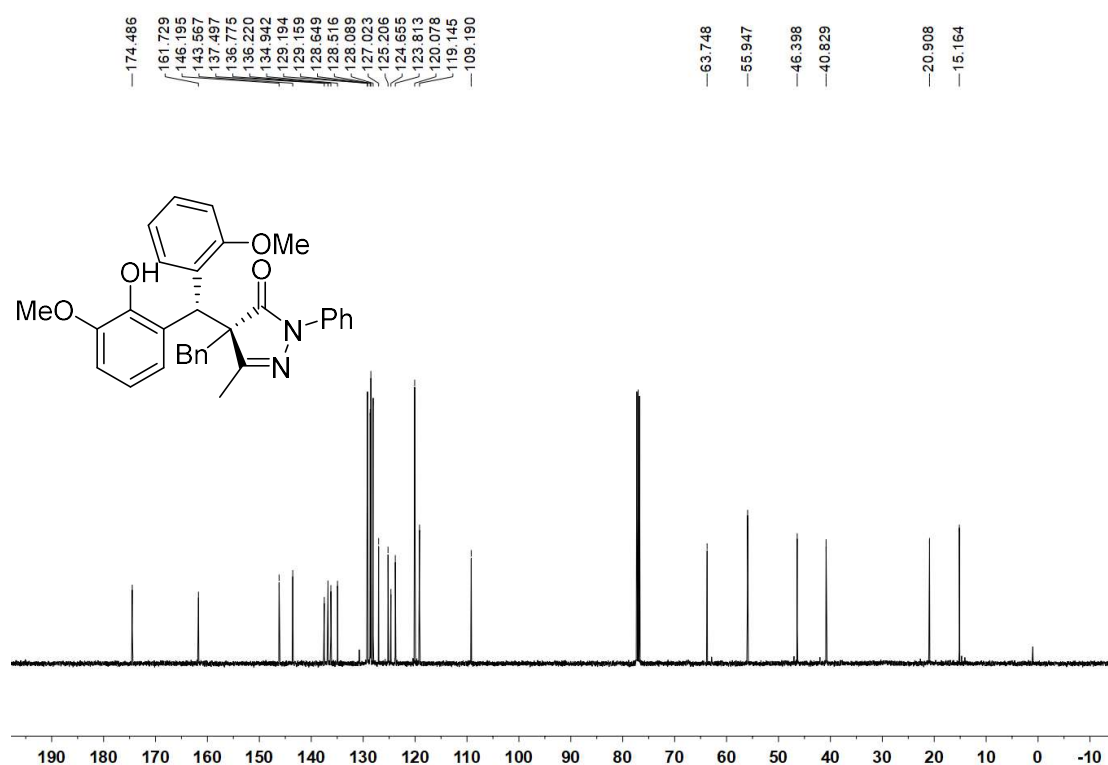

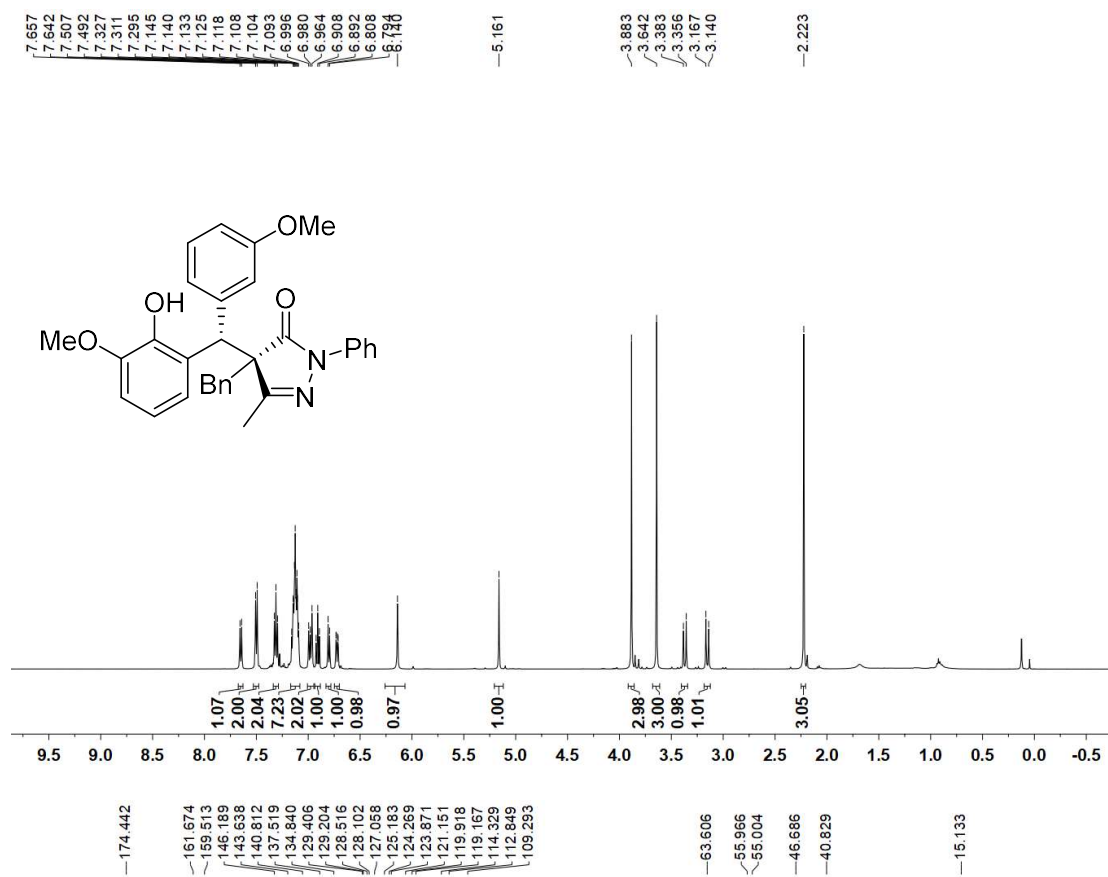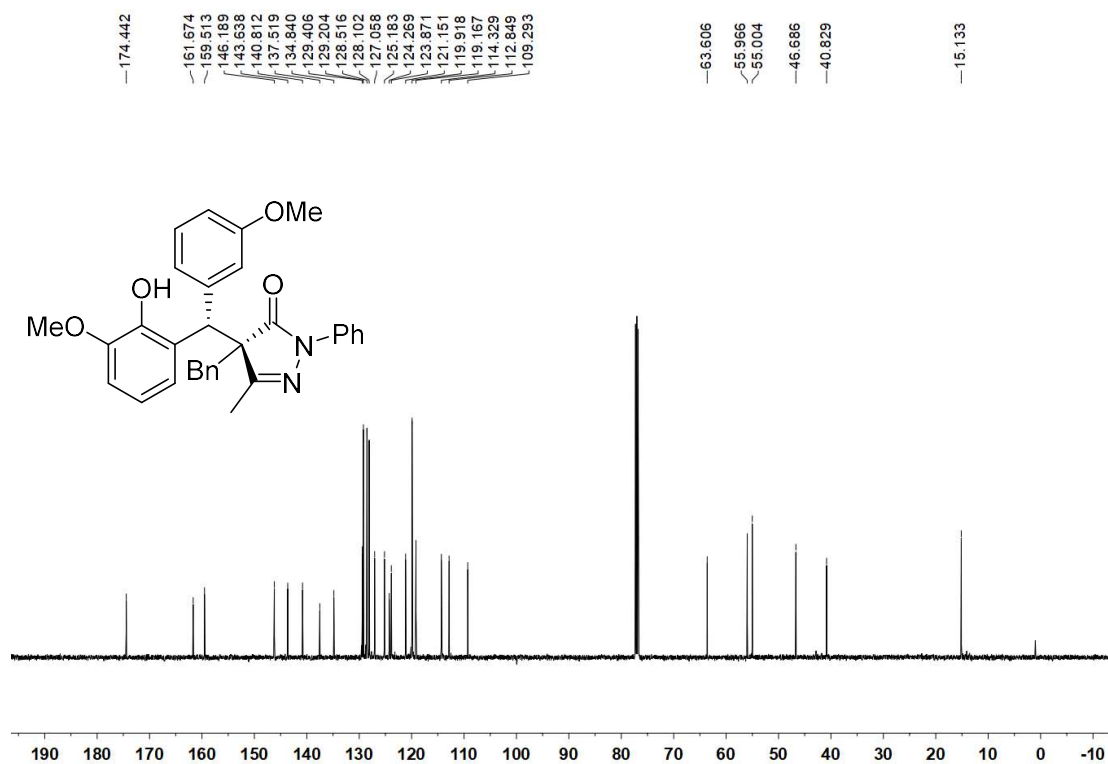

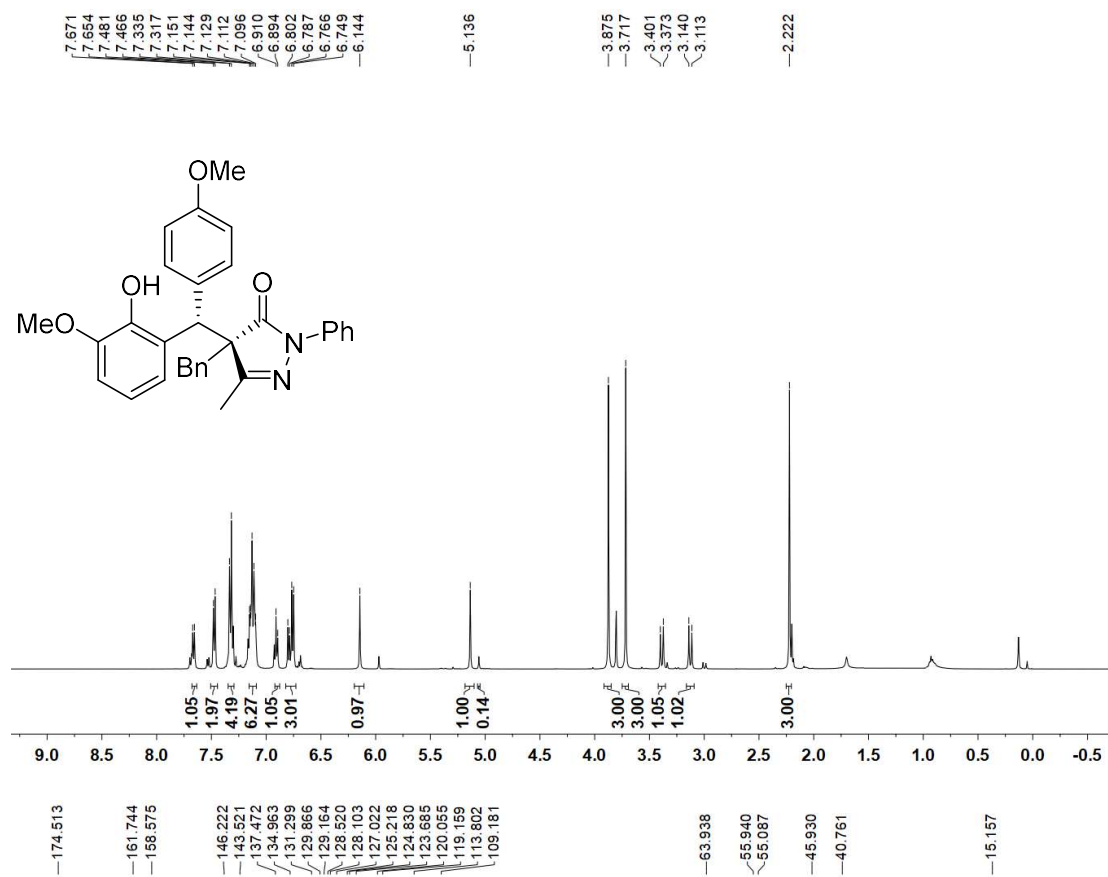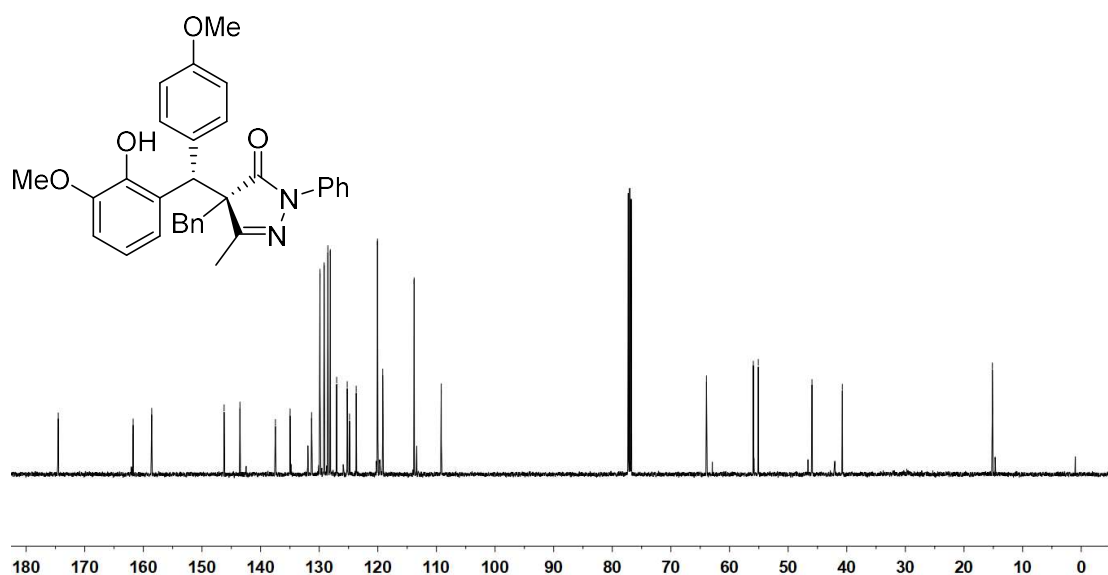

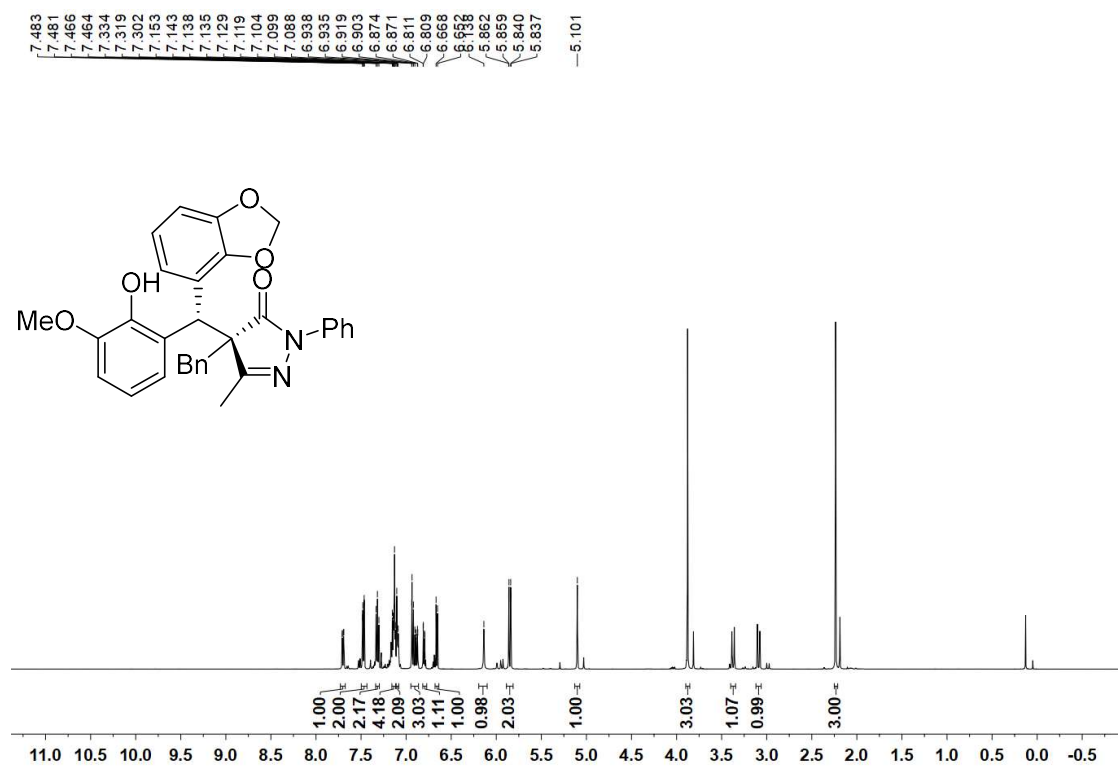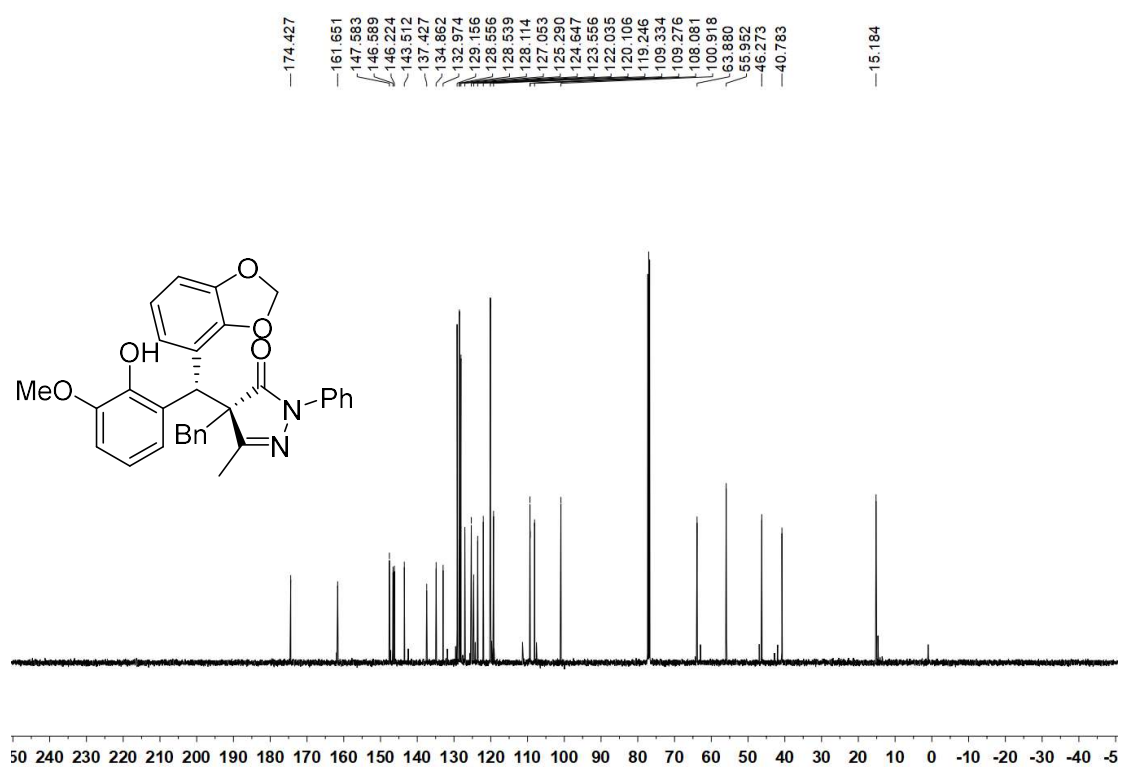



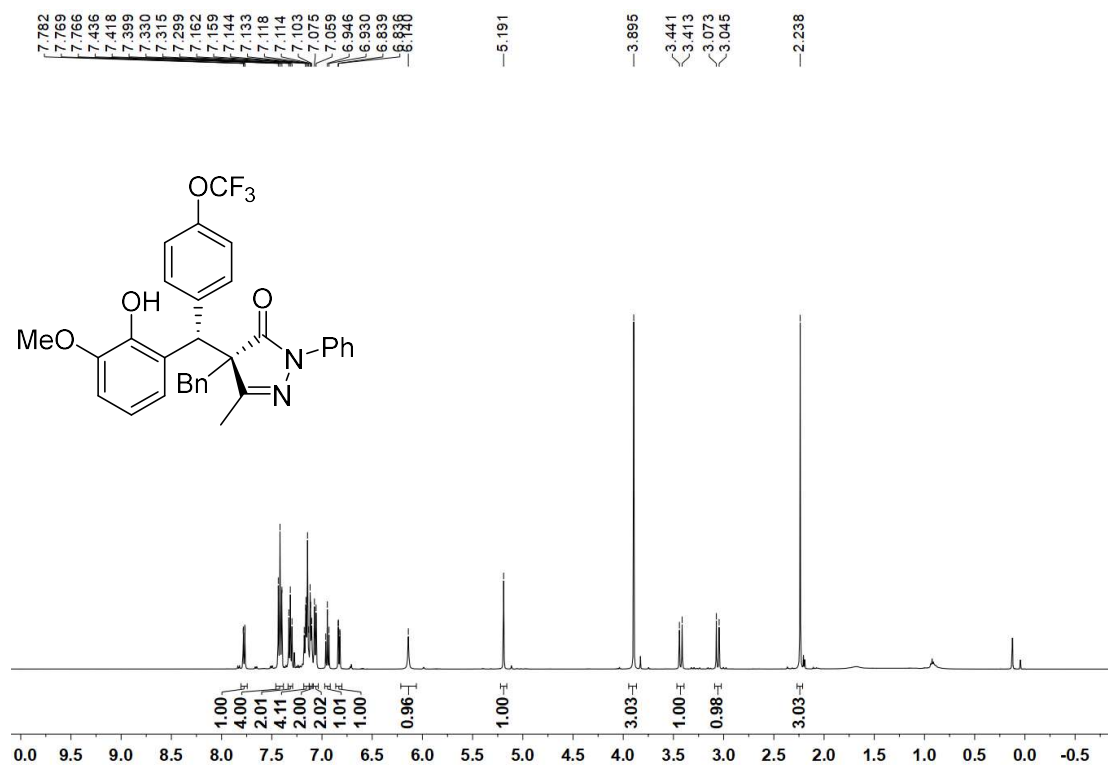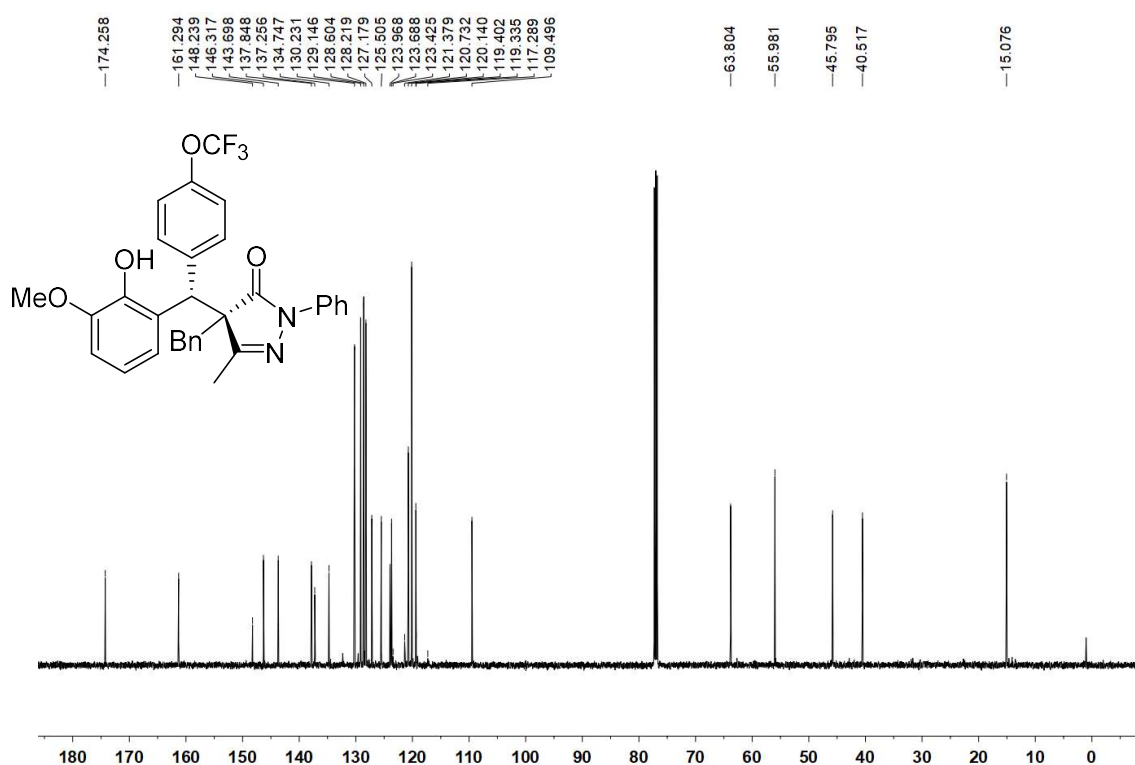

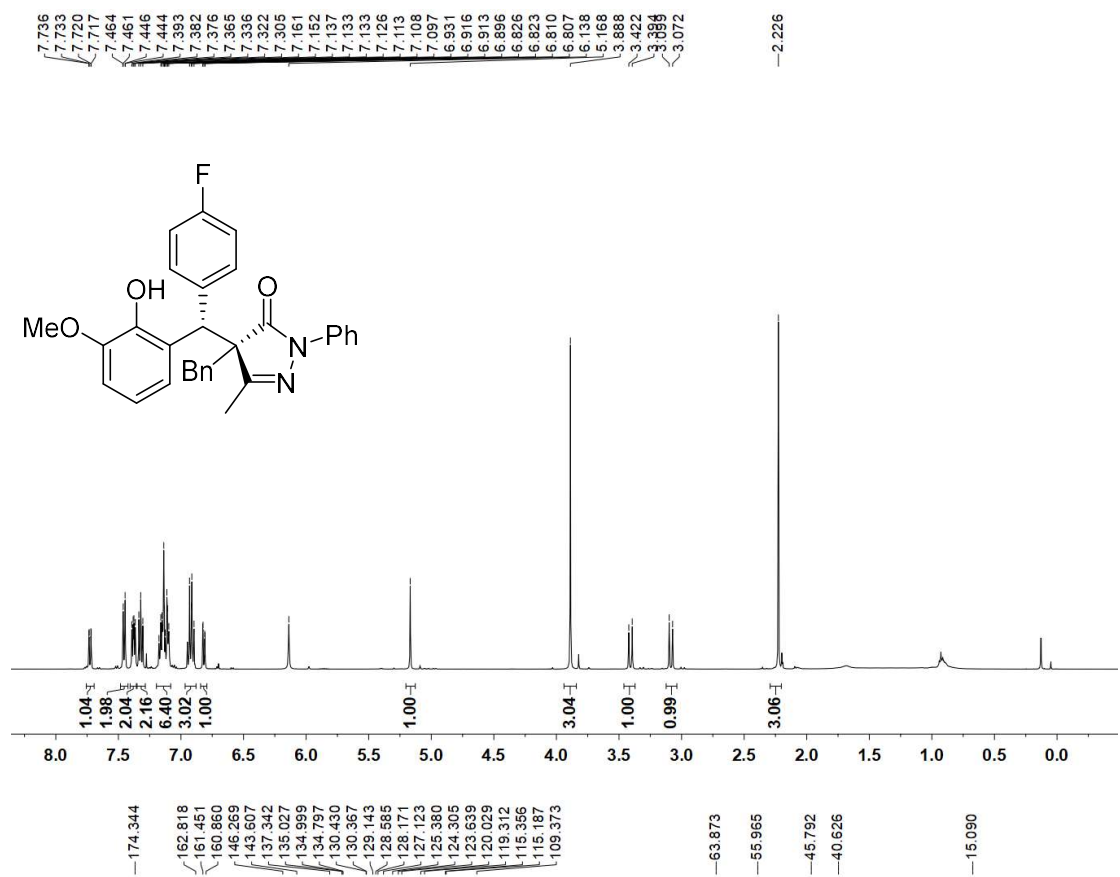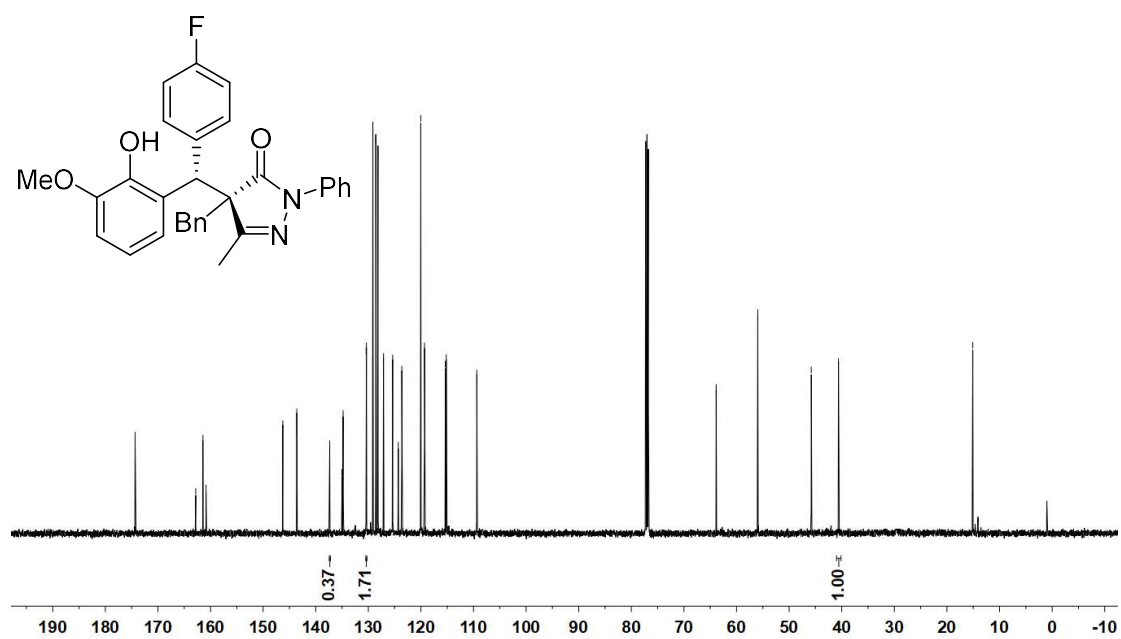

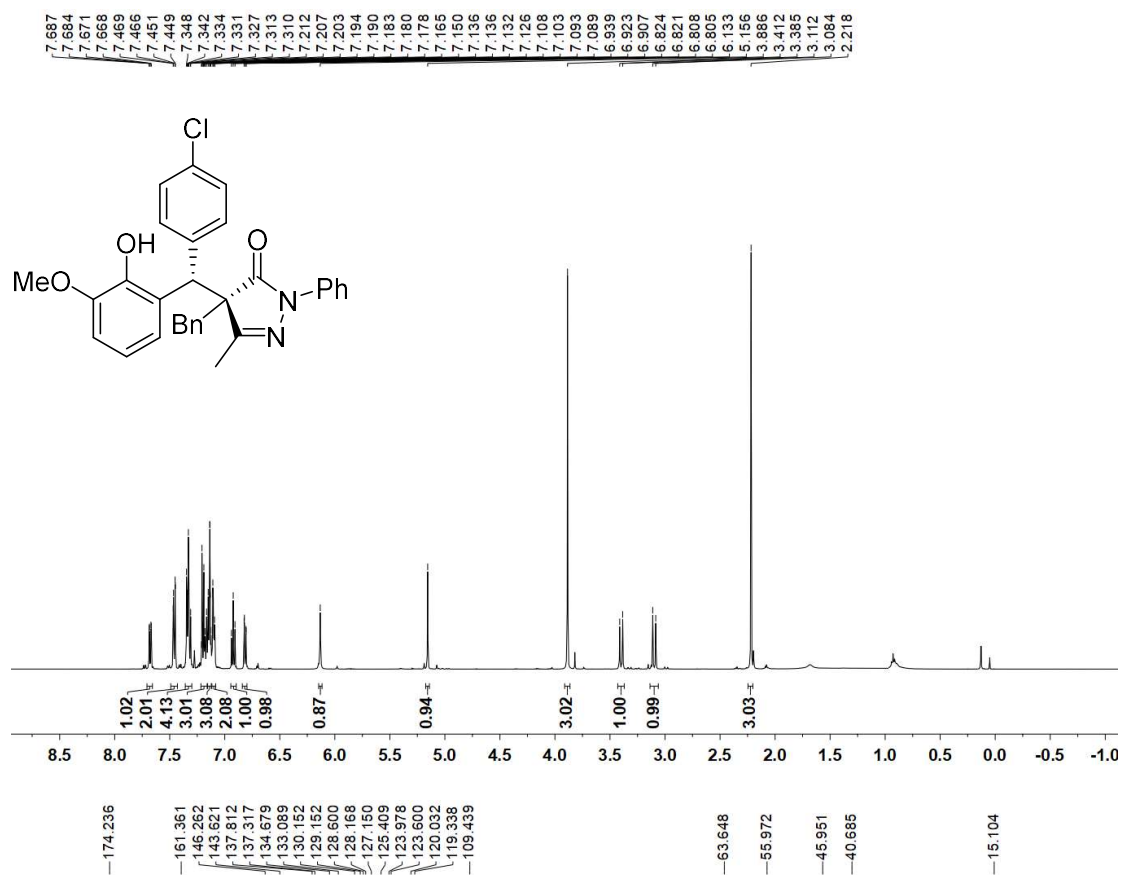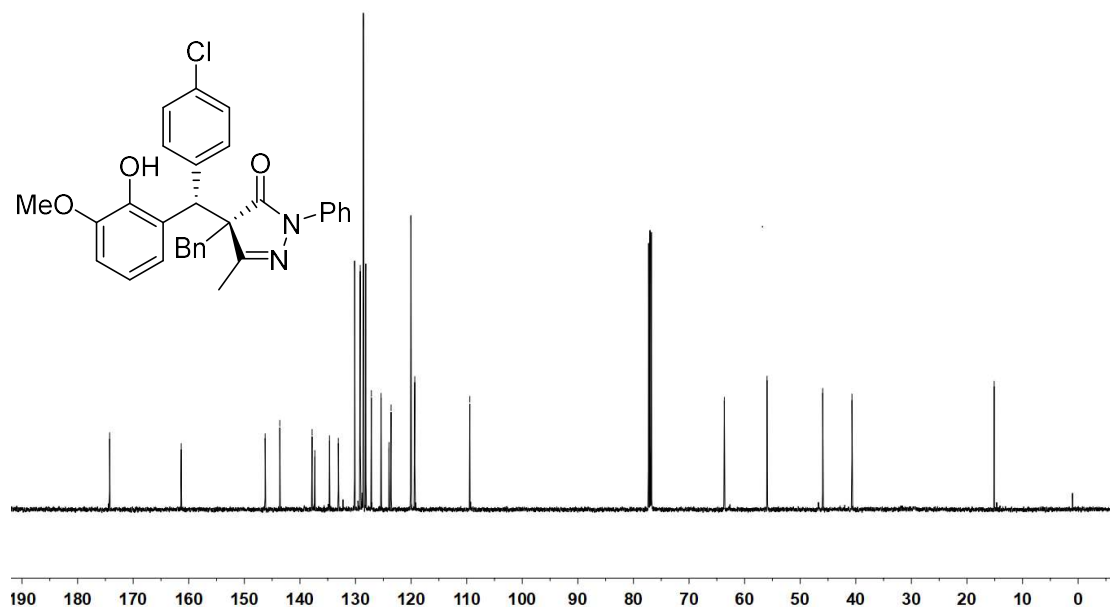

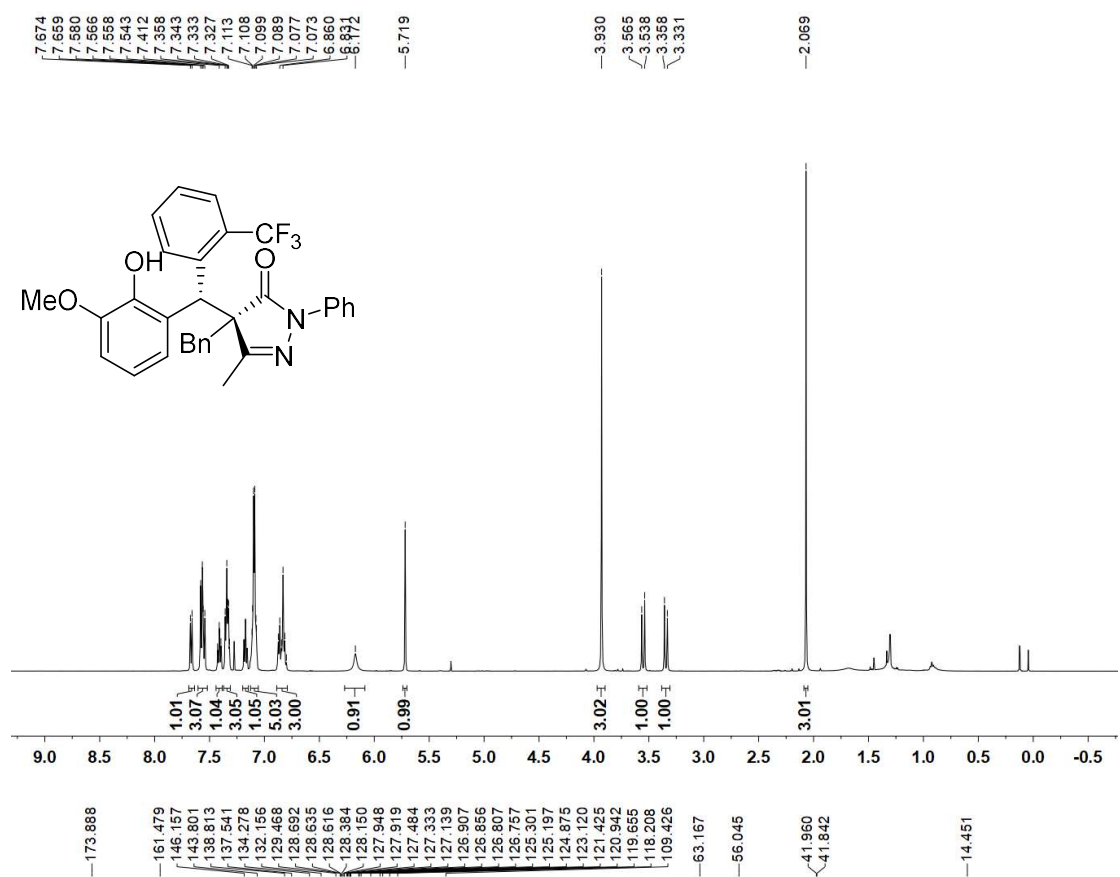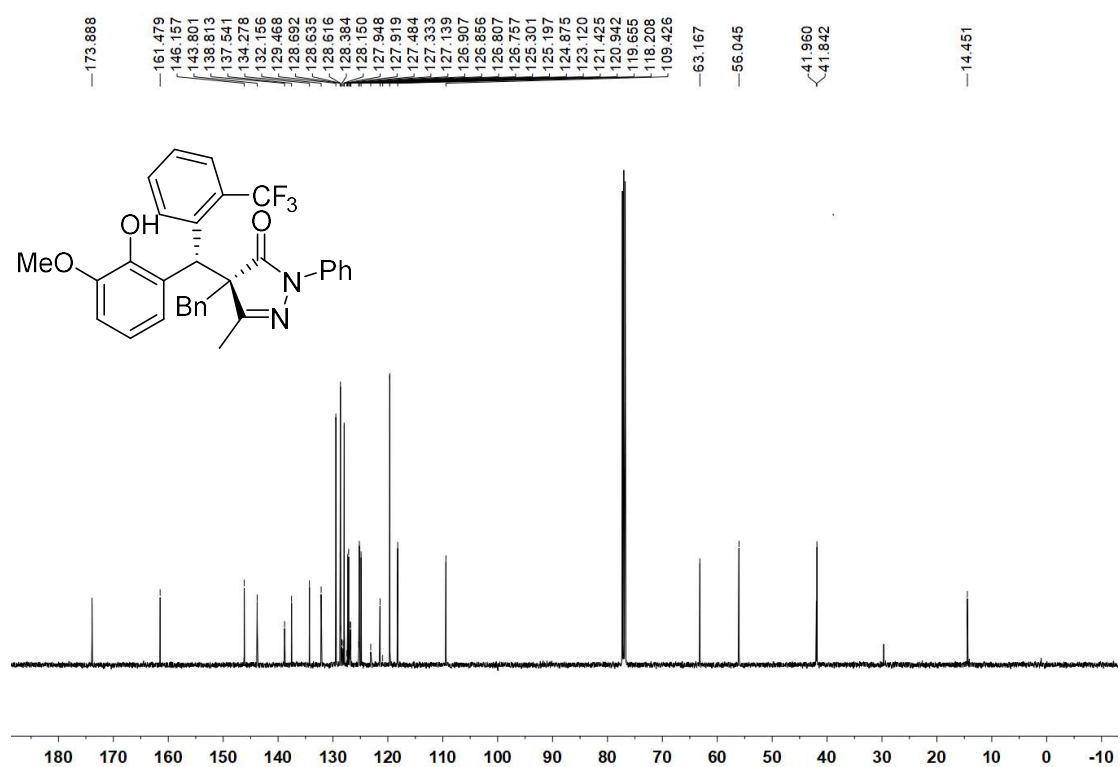

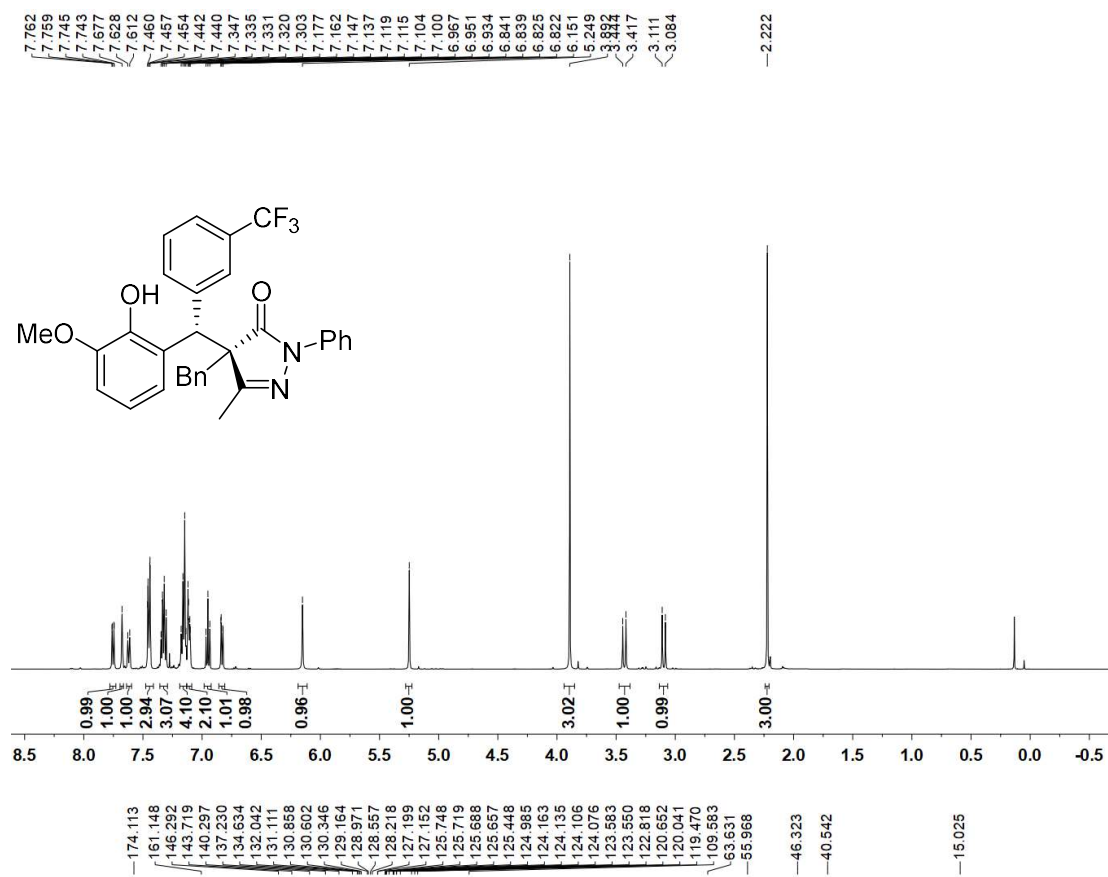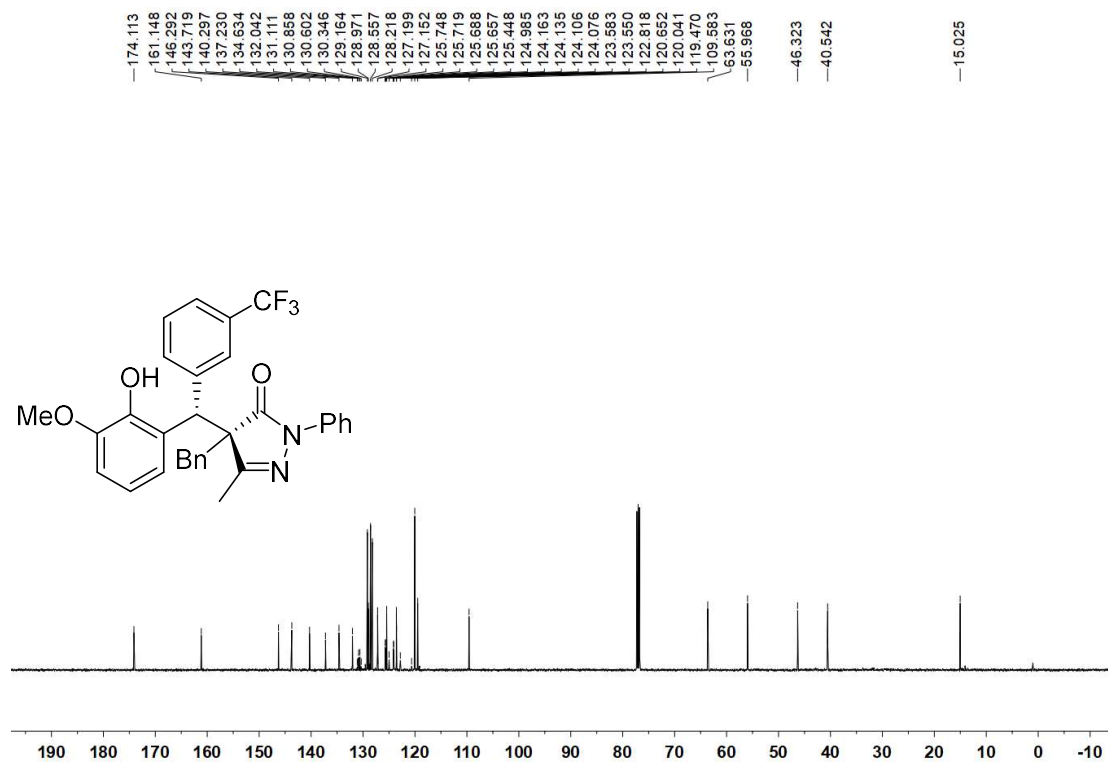

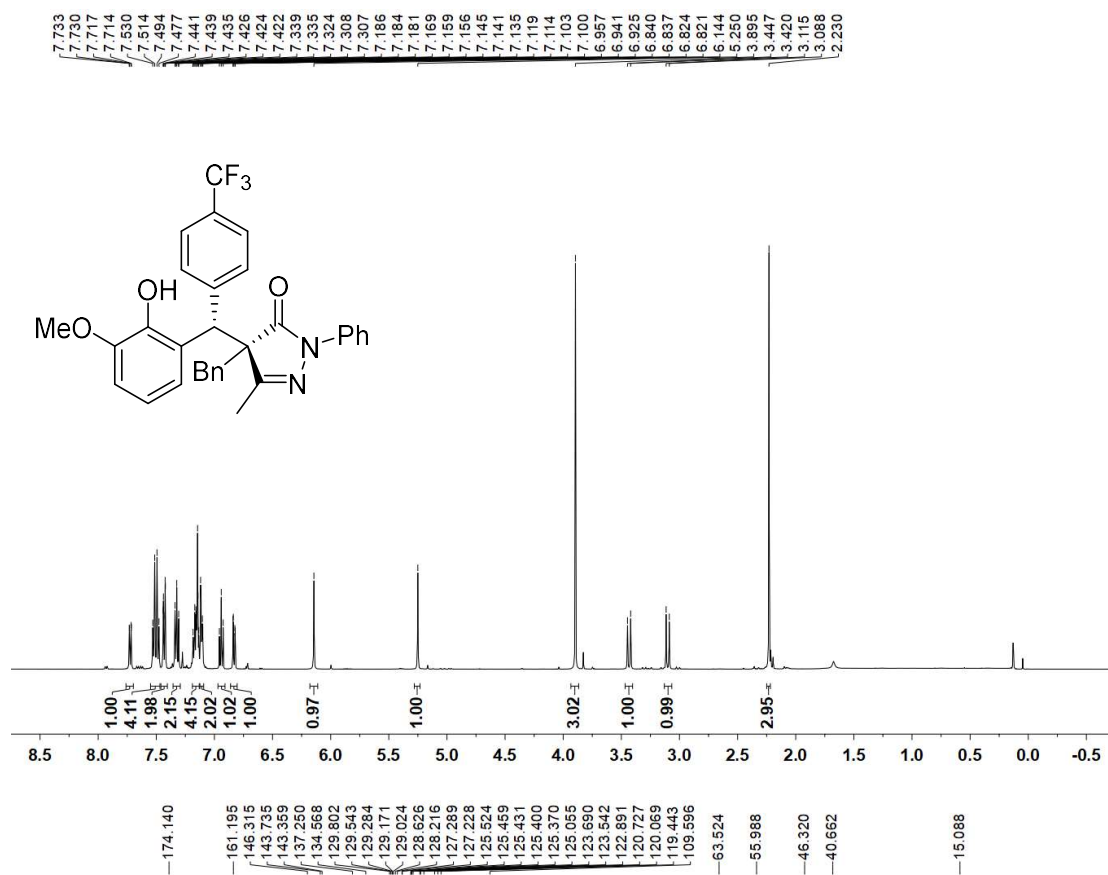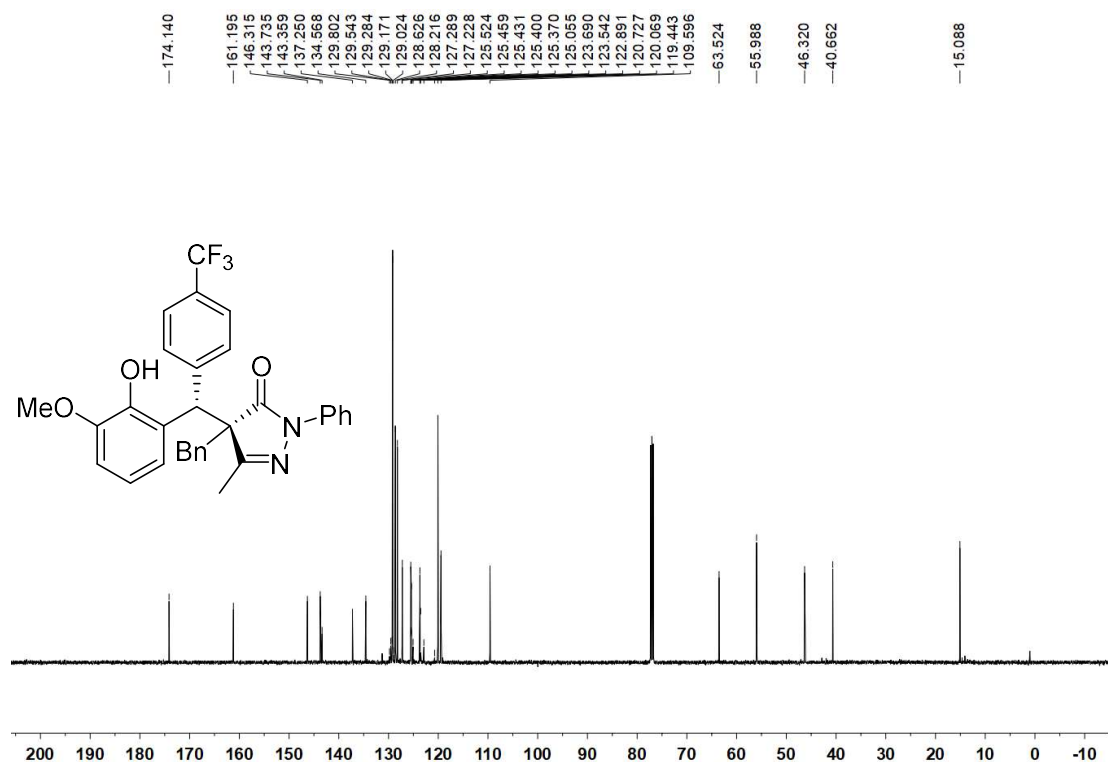

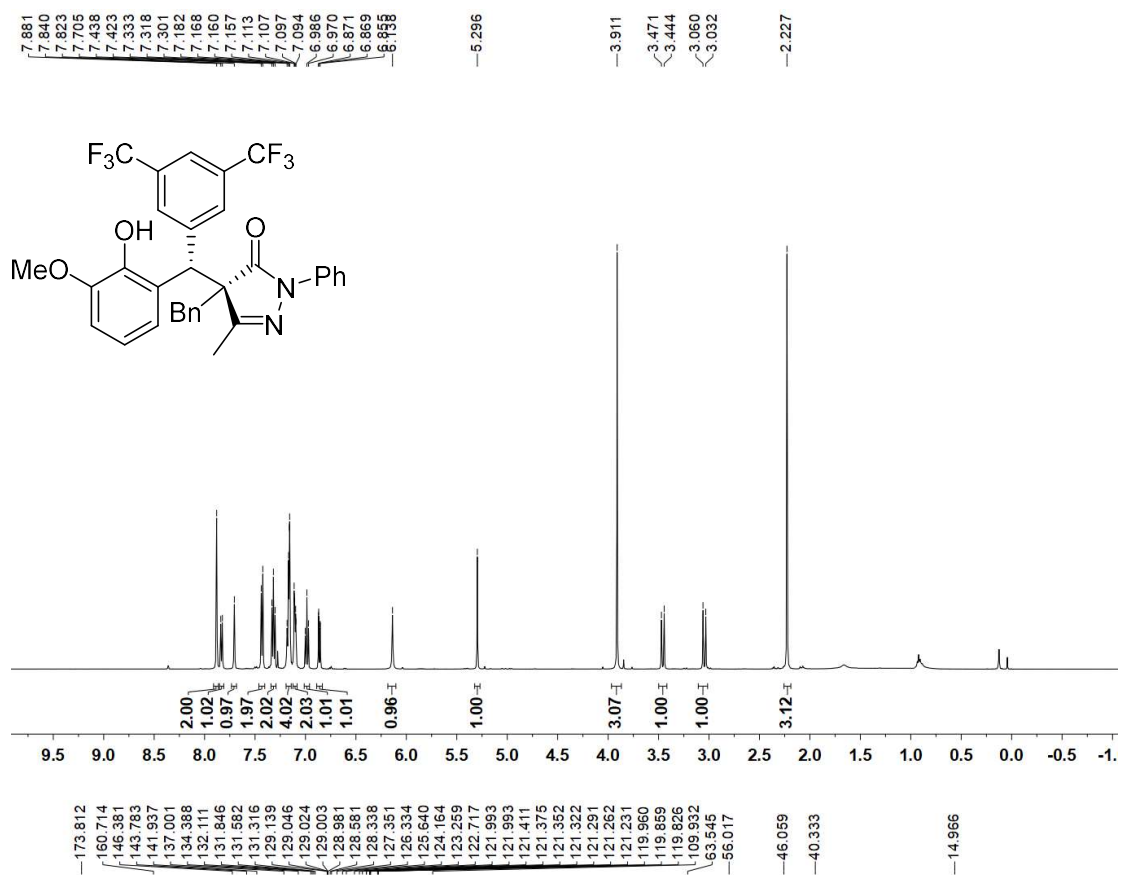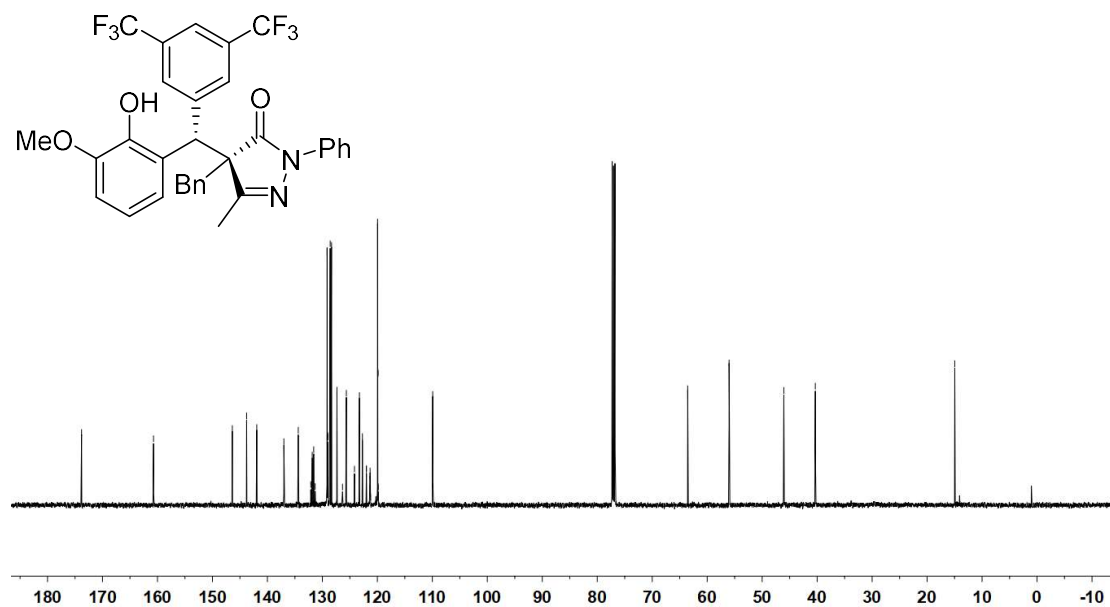

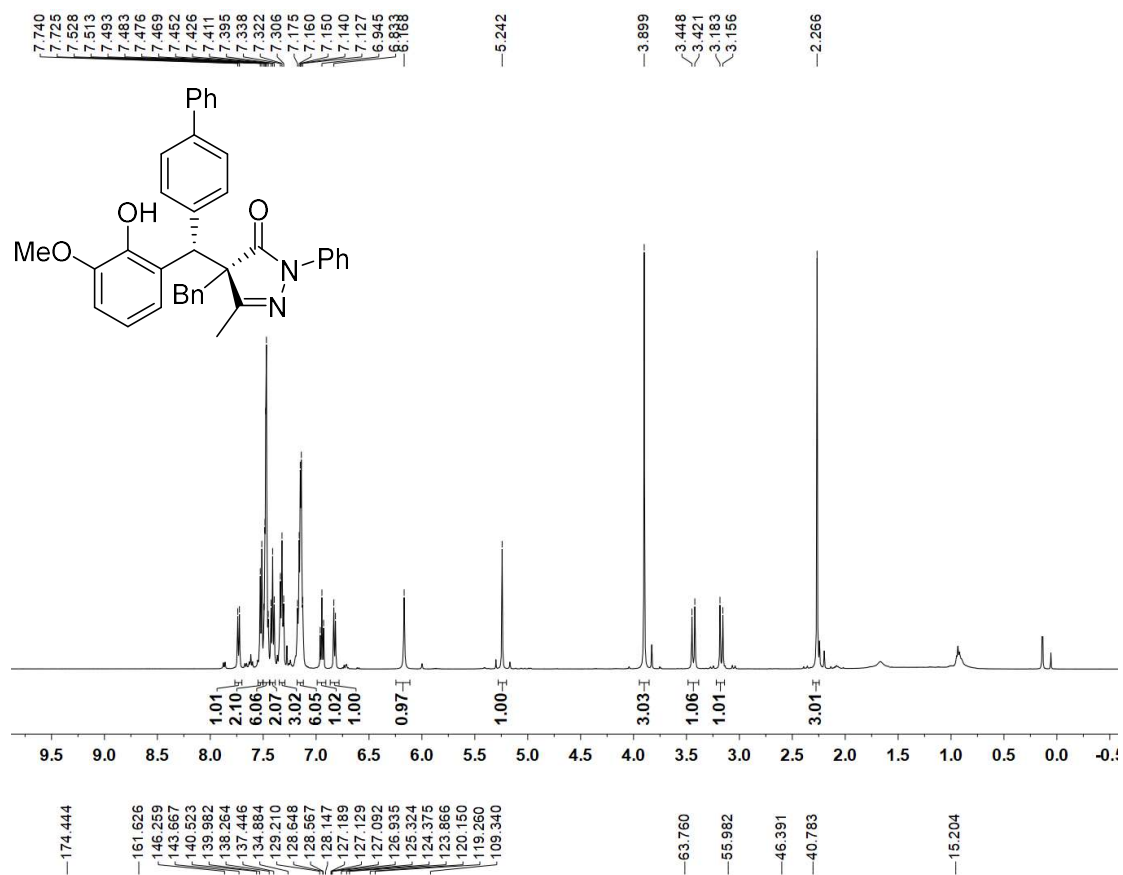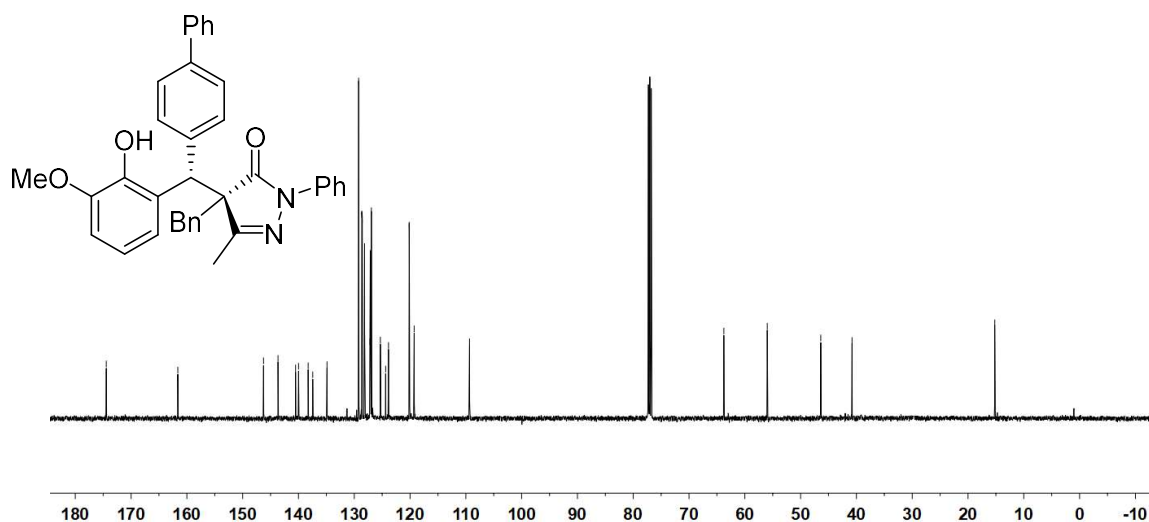

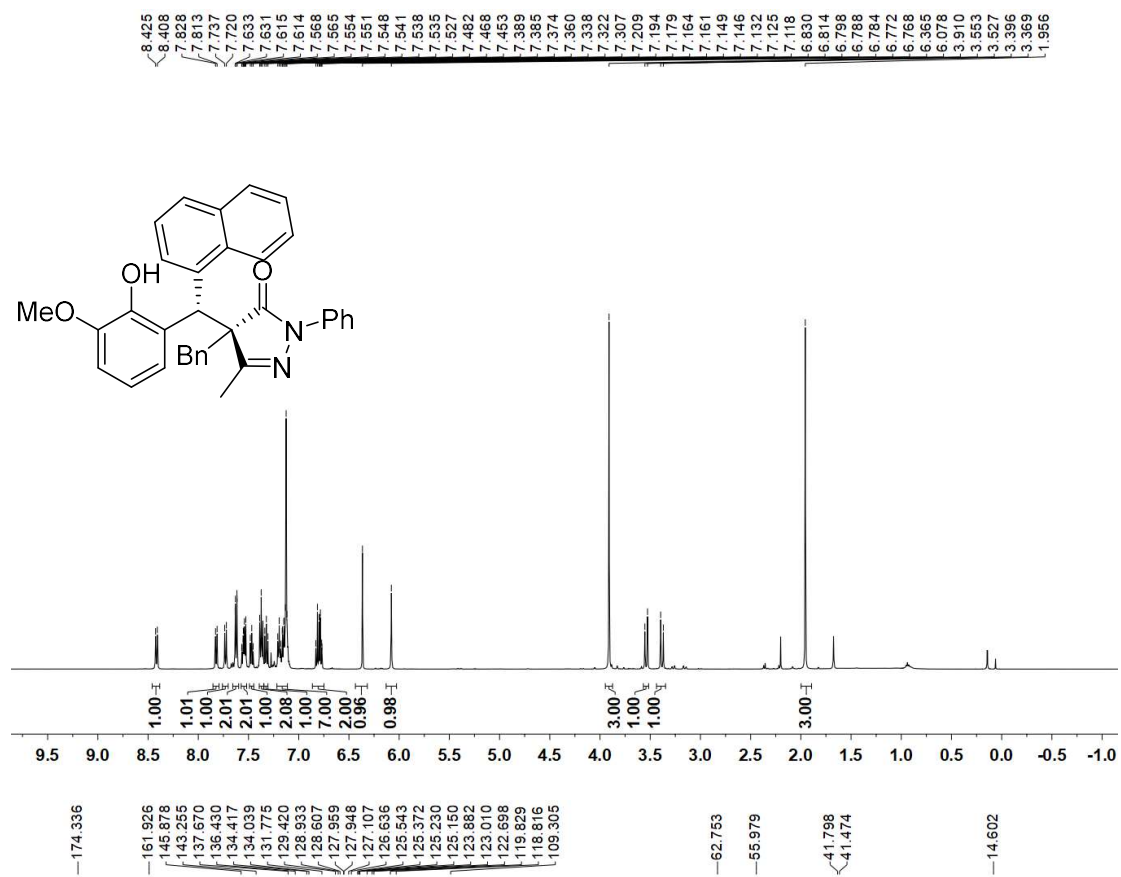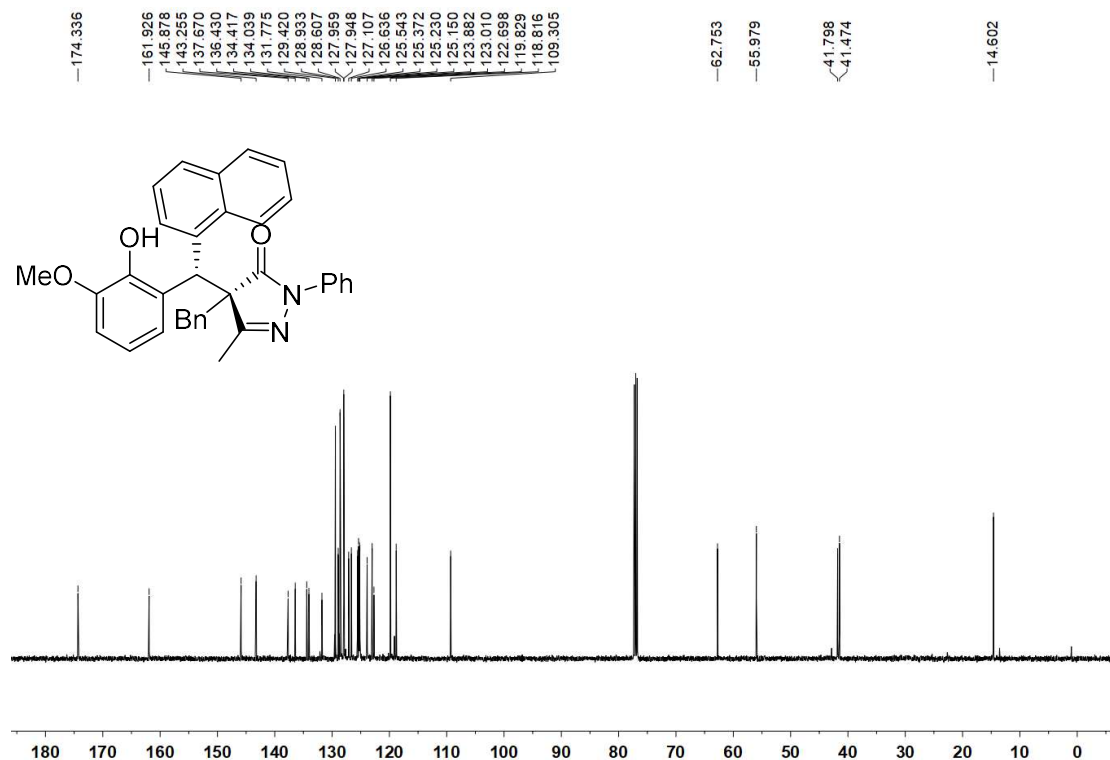

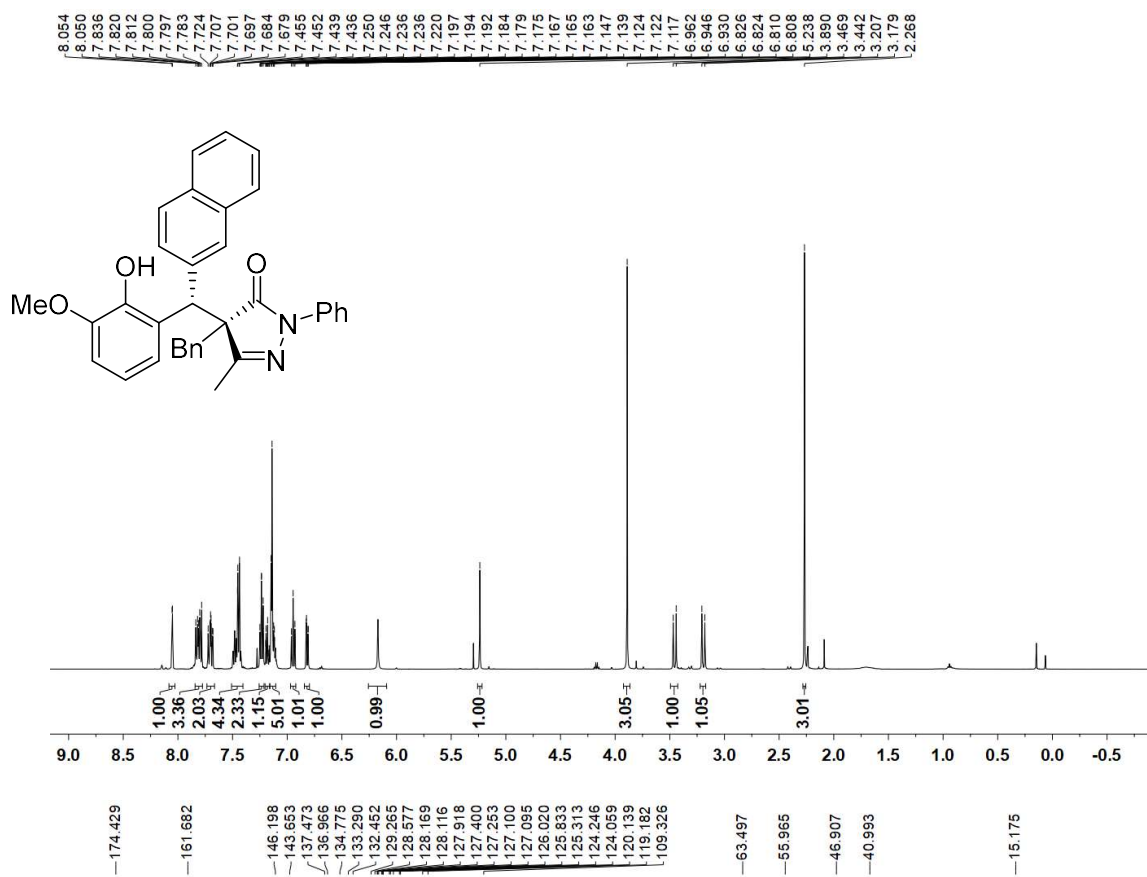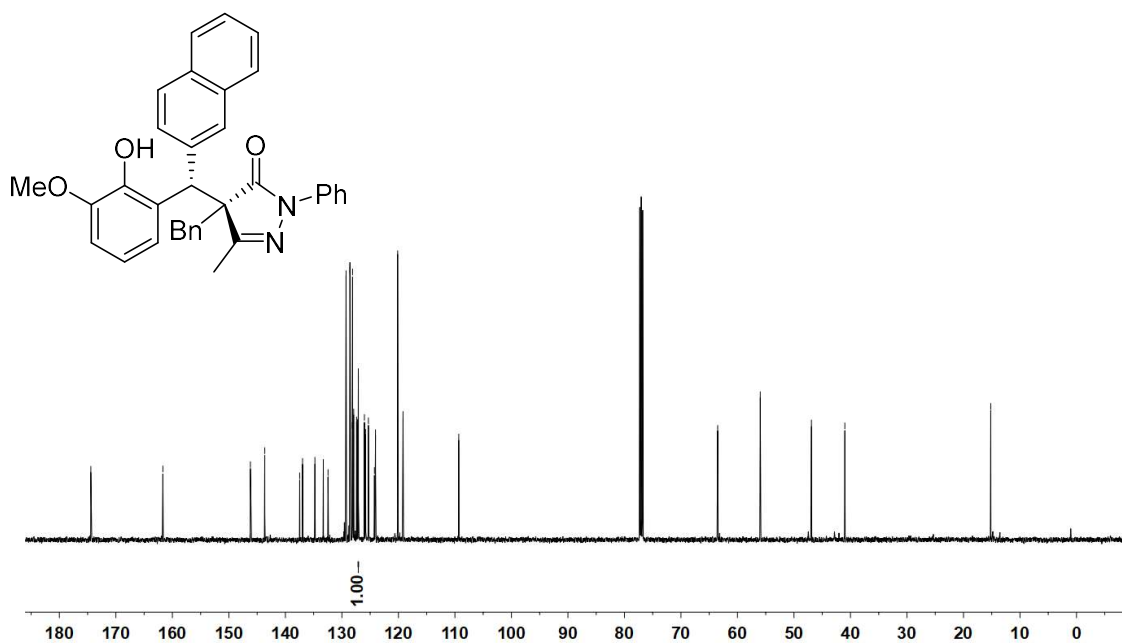

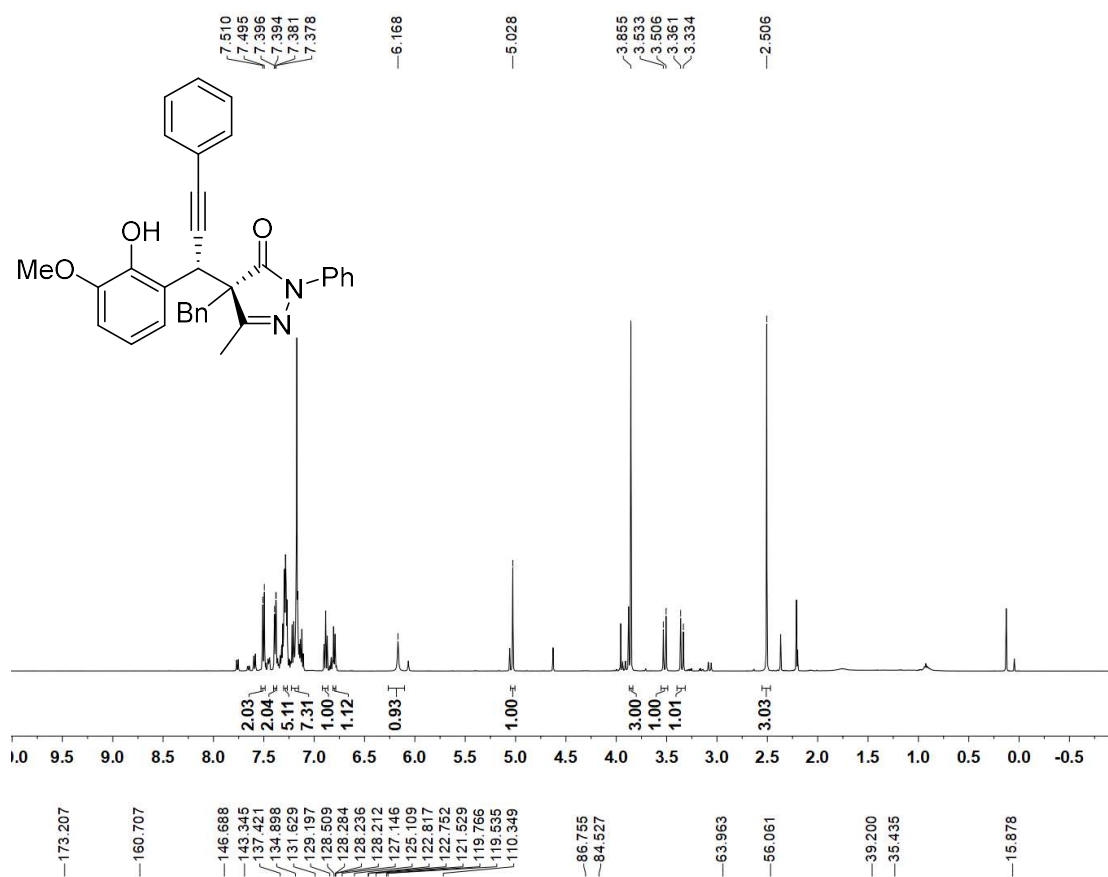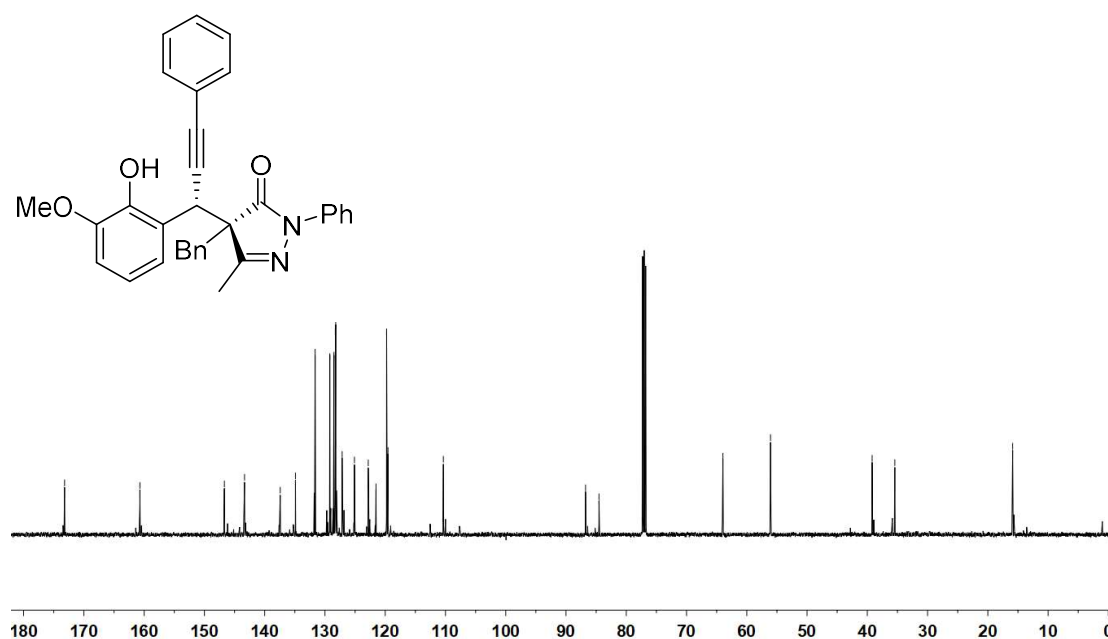

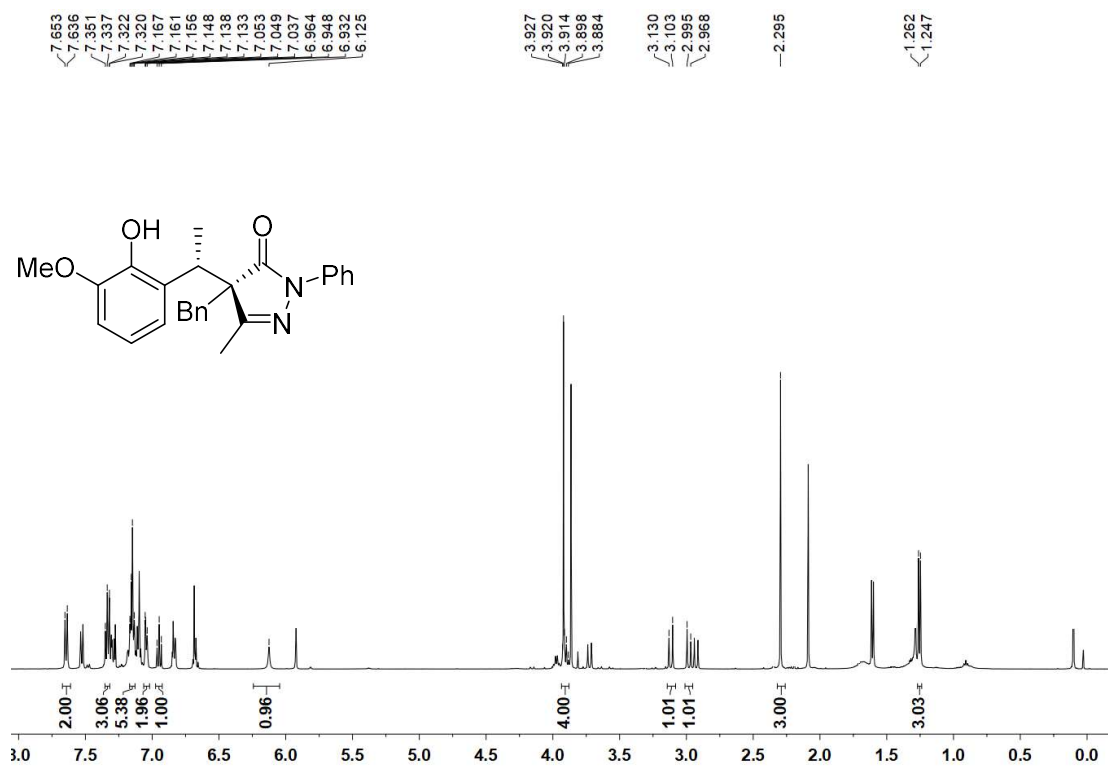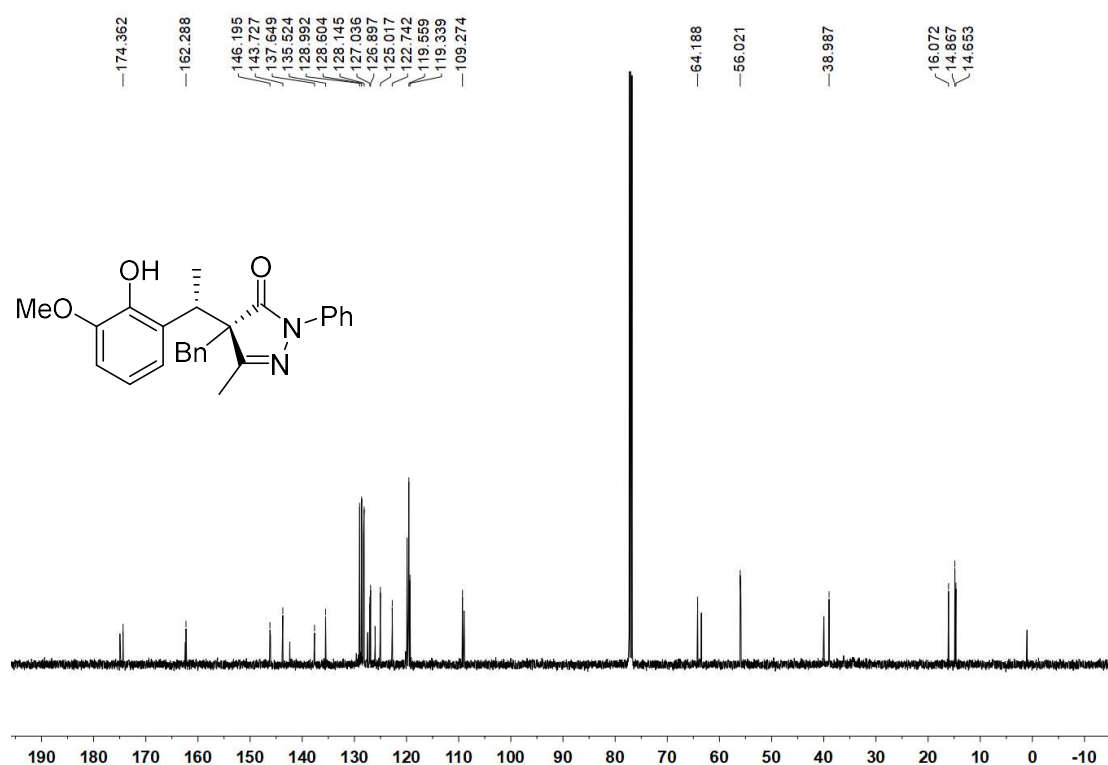

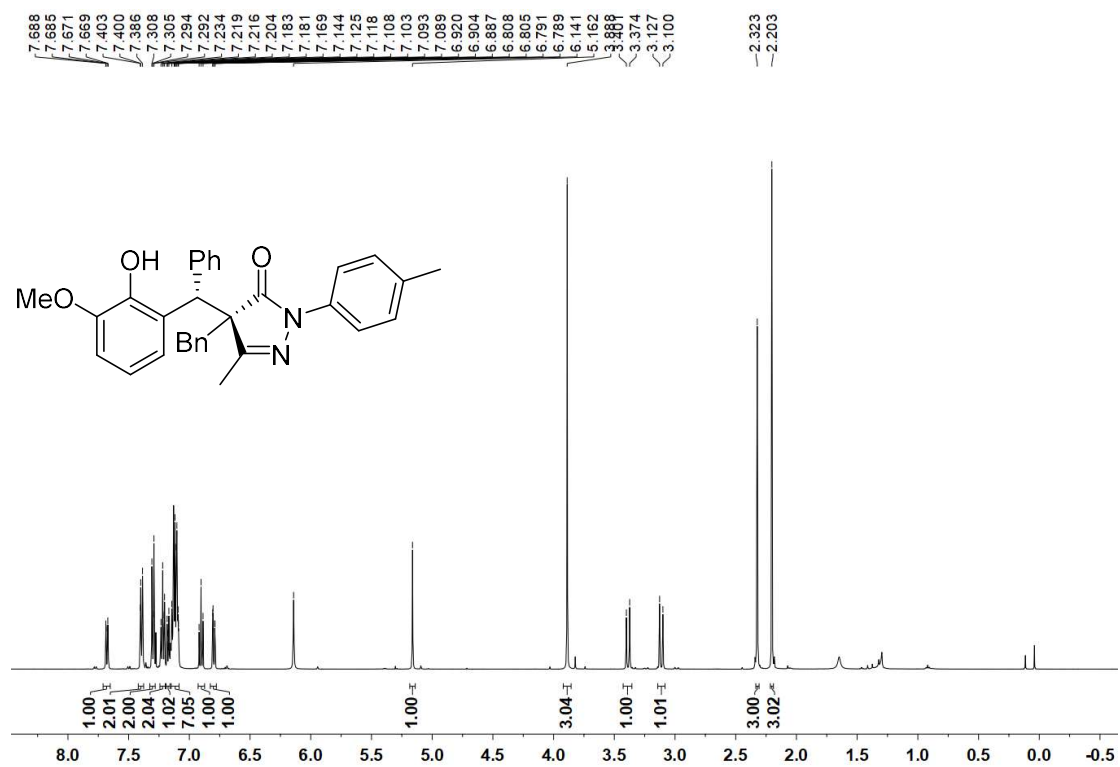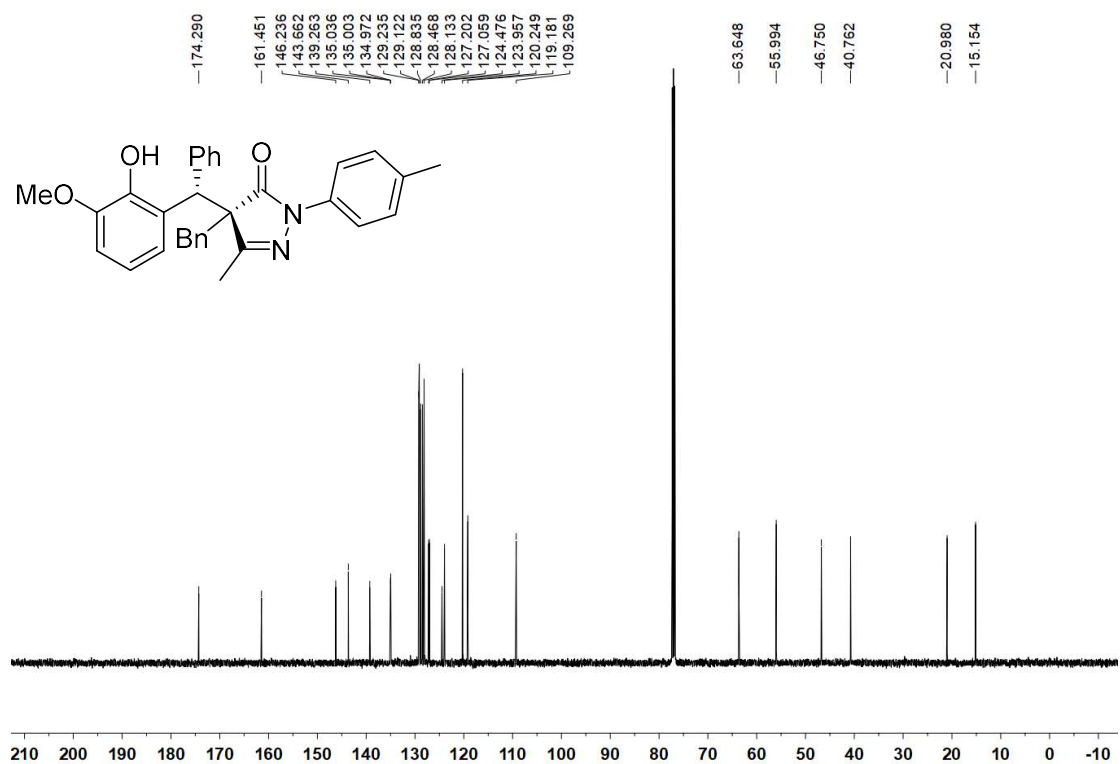

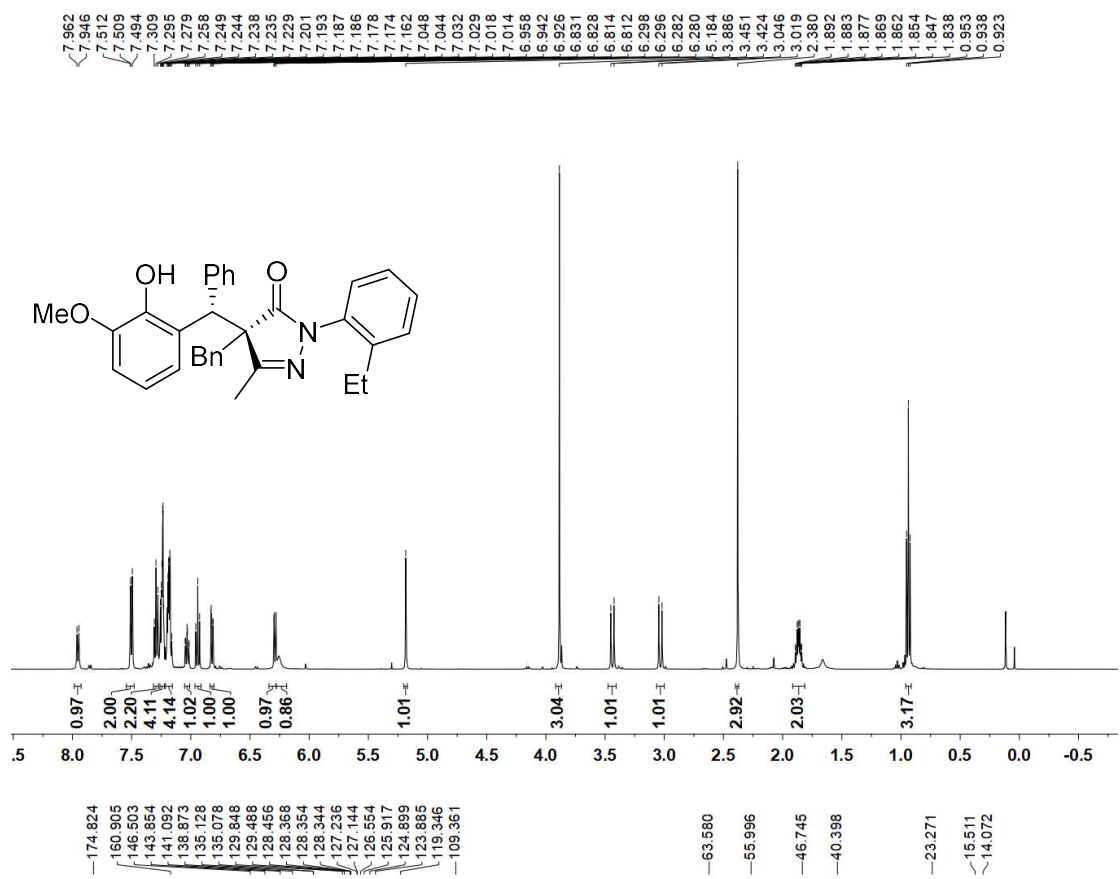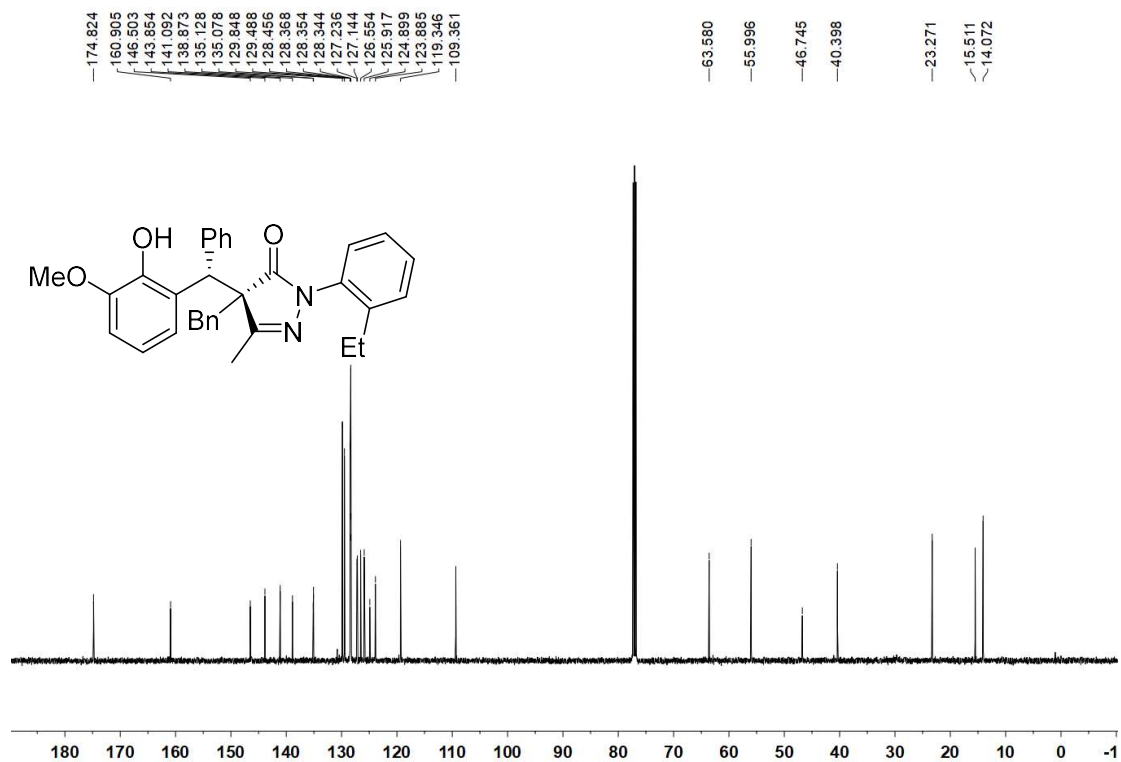

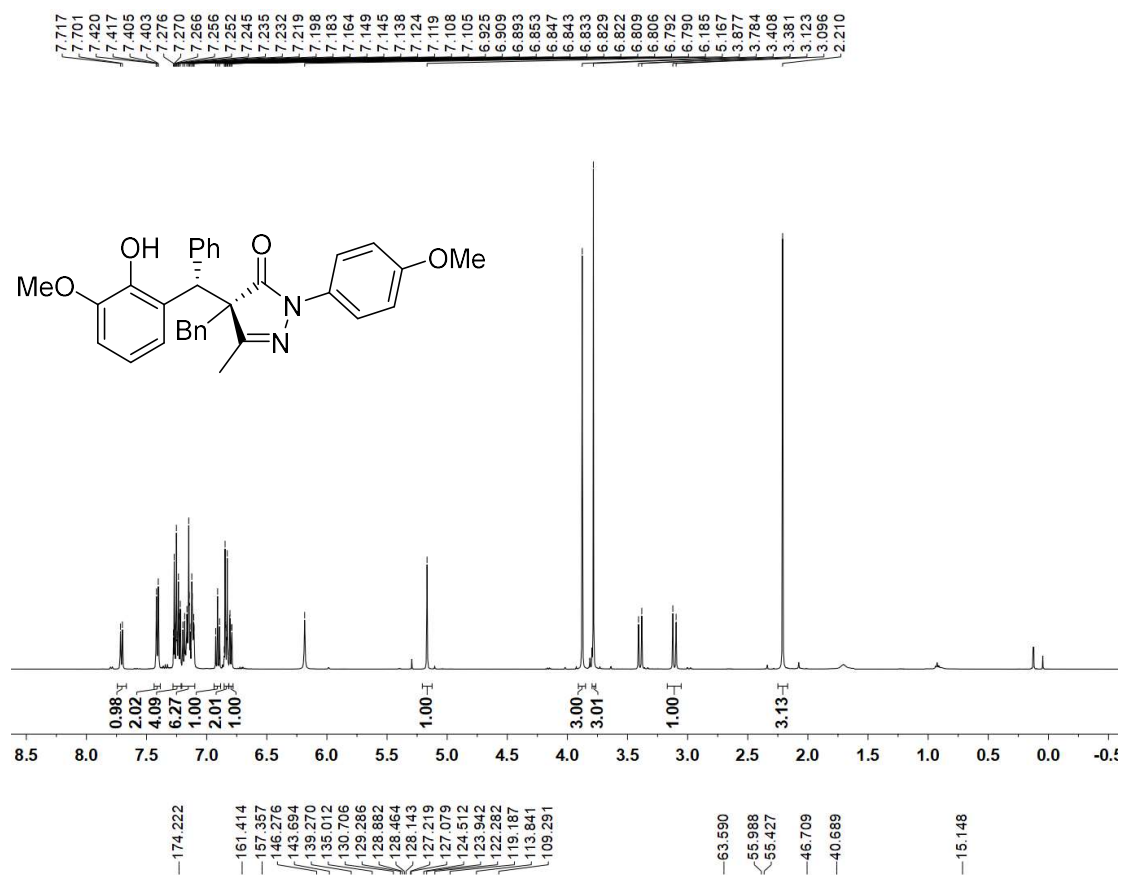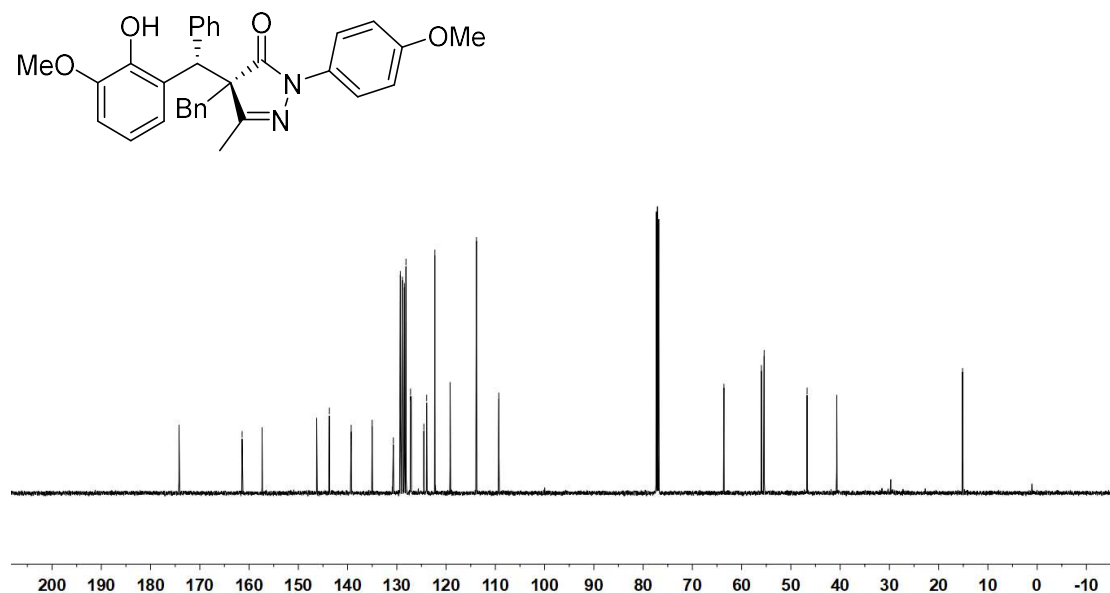

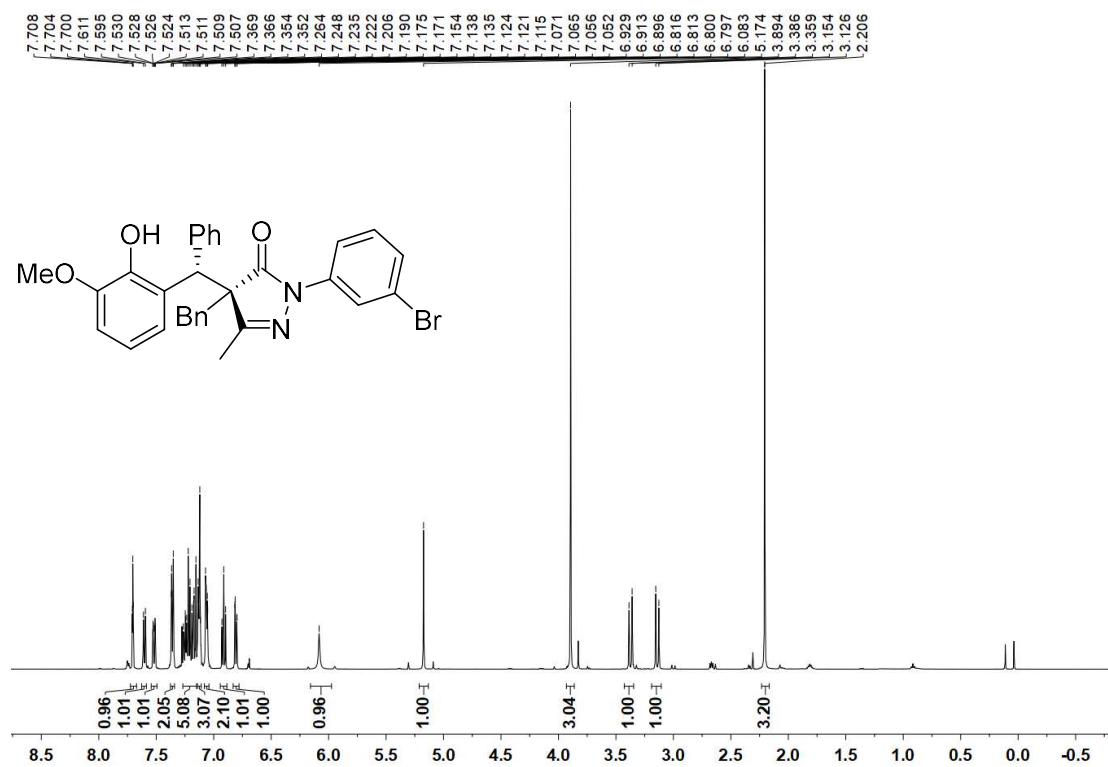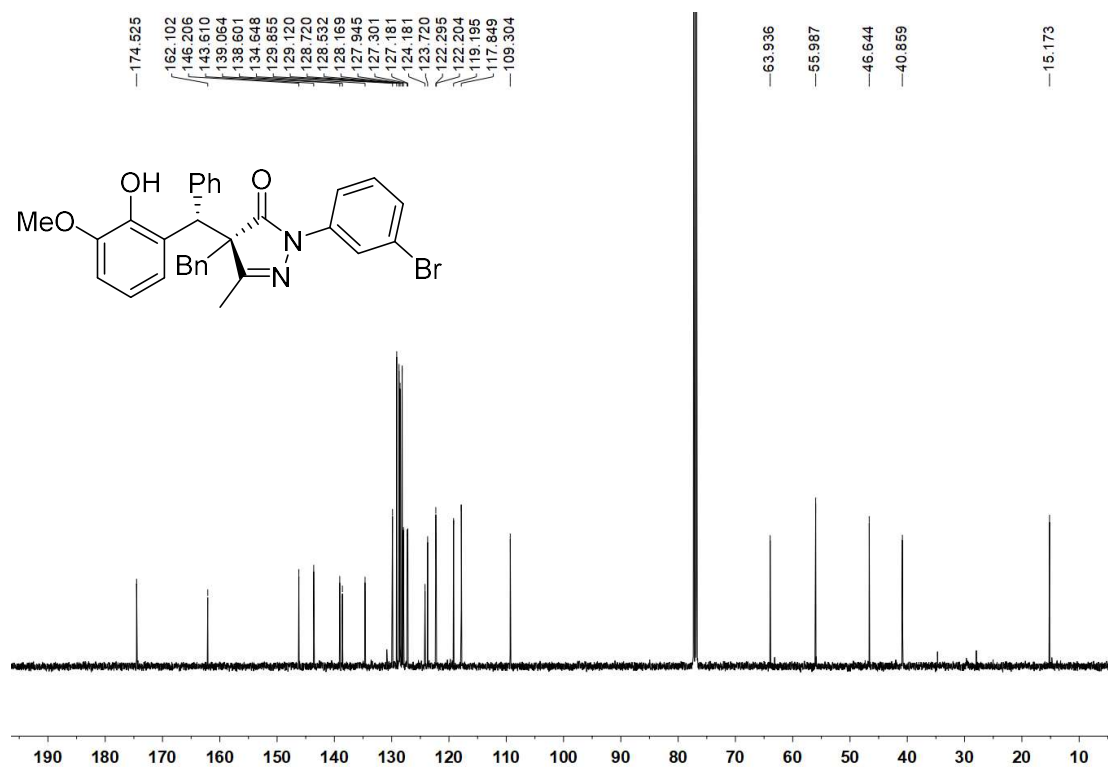

7.614  
7.598  
7.409  
7.365  
7.362  
7.359  
7.352  
7.348  
7.342  
7.227  
7.224  
7.220  
7.210  
7.207  
7.198  
7.195  
7.191  
7.183  
7.180  
7.178  
7.171  
7.166  
7.160  
7.124  
7.120  
7.109  
6.920  
6.903  
6.887  
6.811  
6.809  
6.795  
6.792

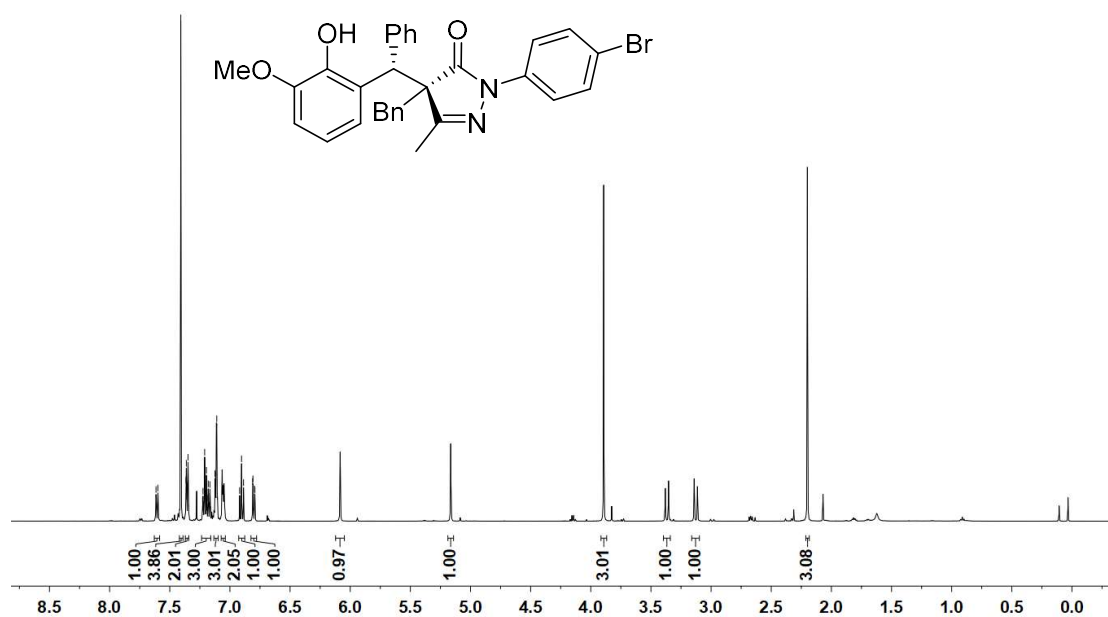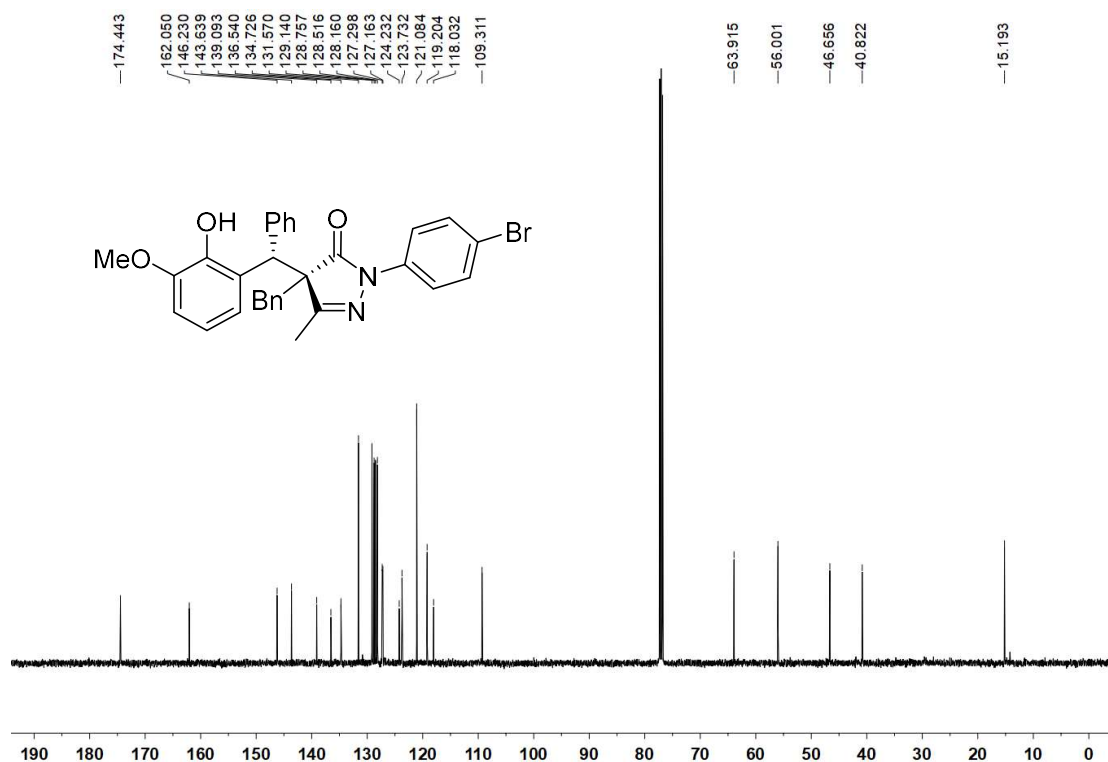

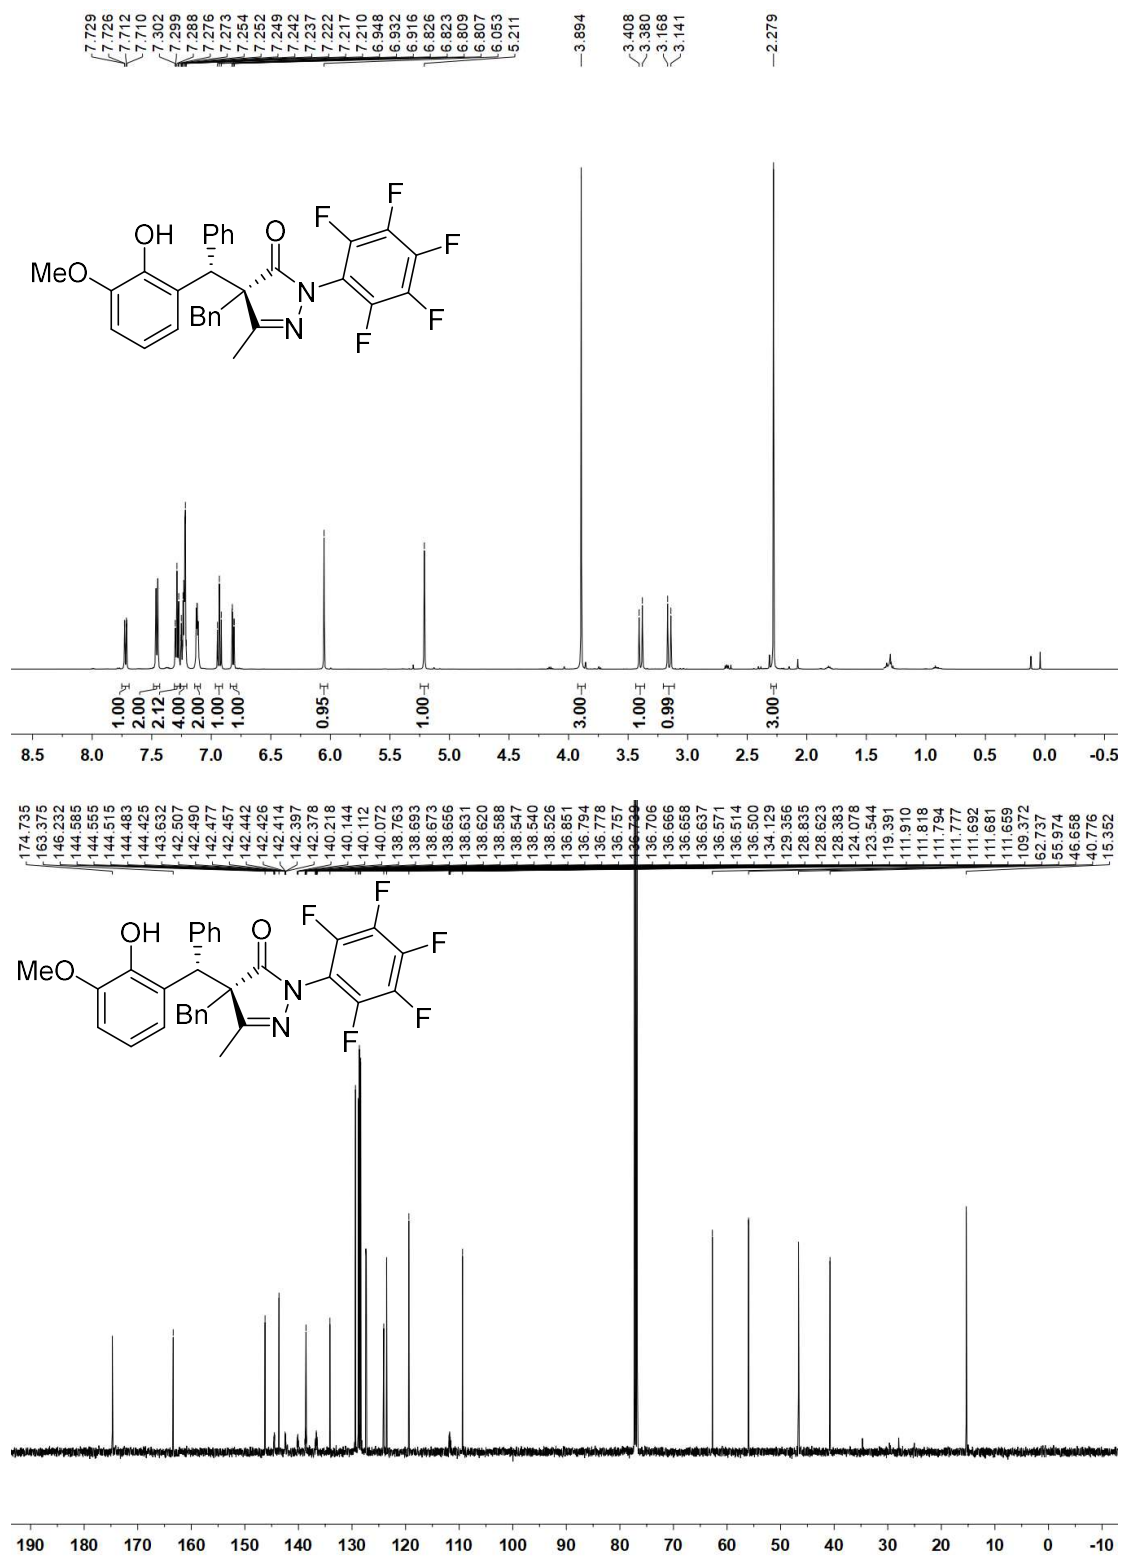

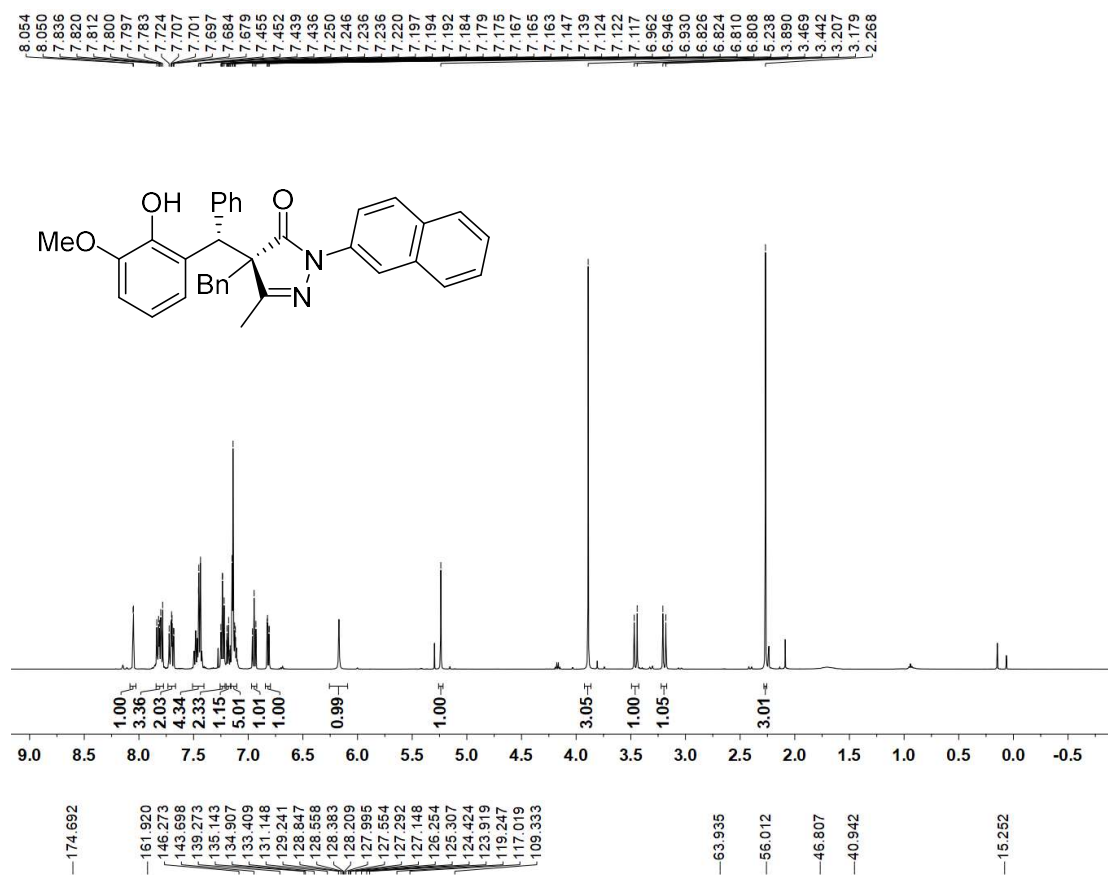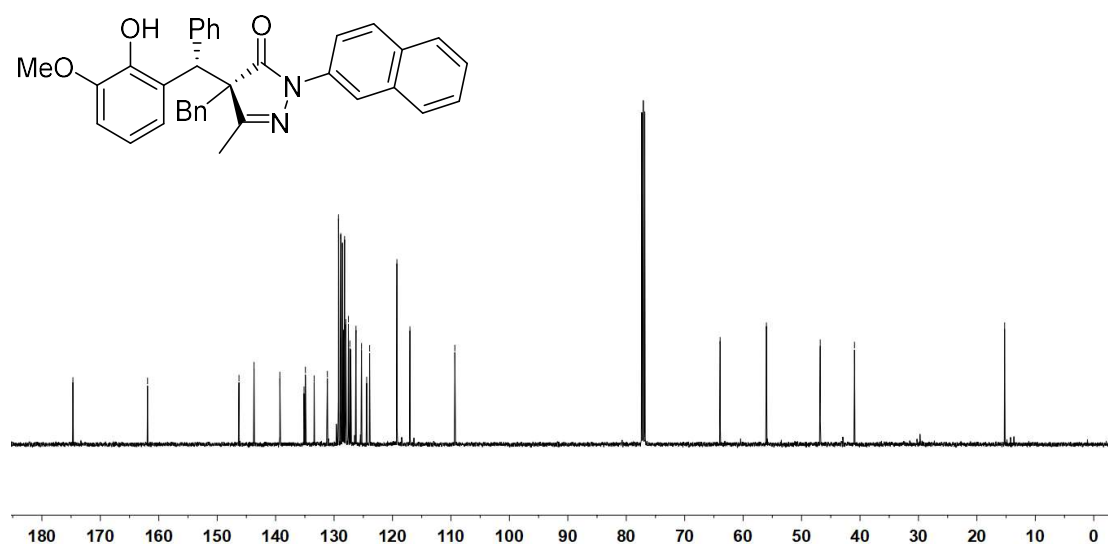

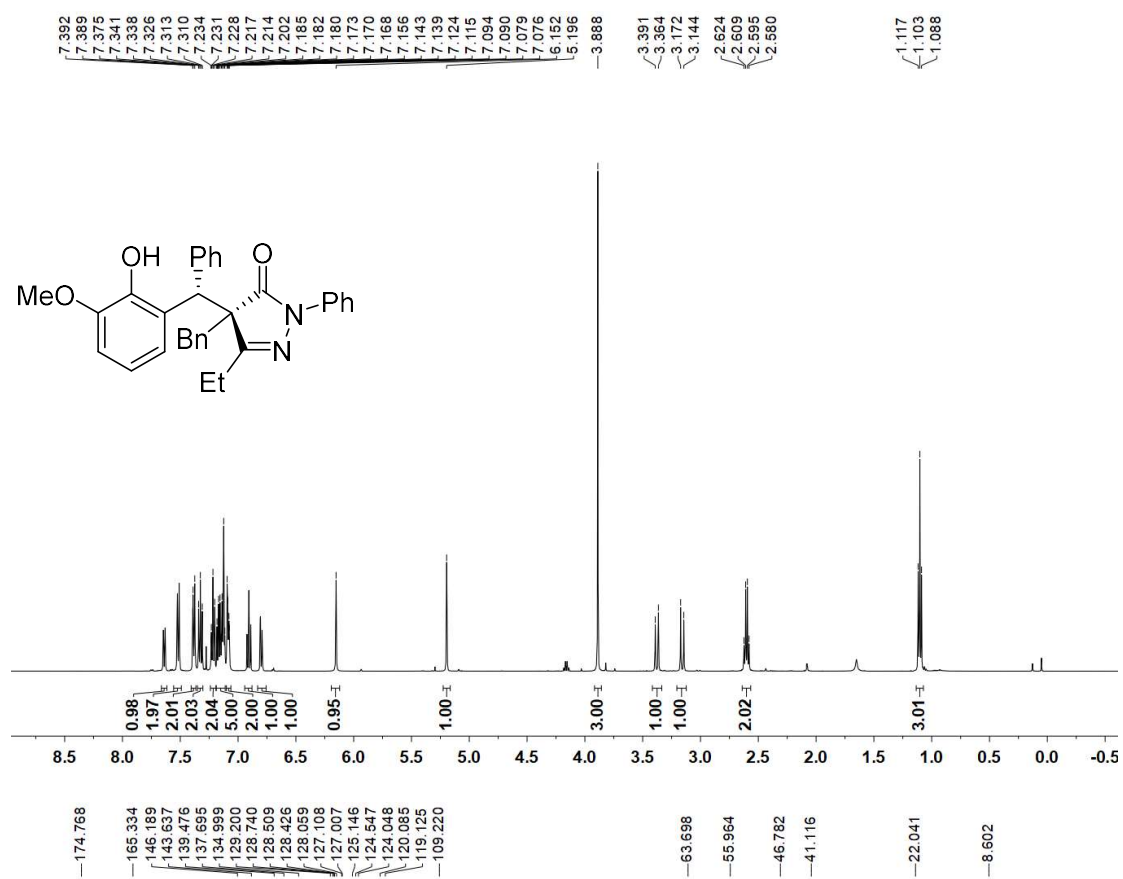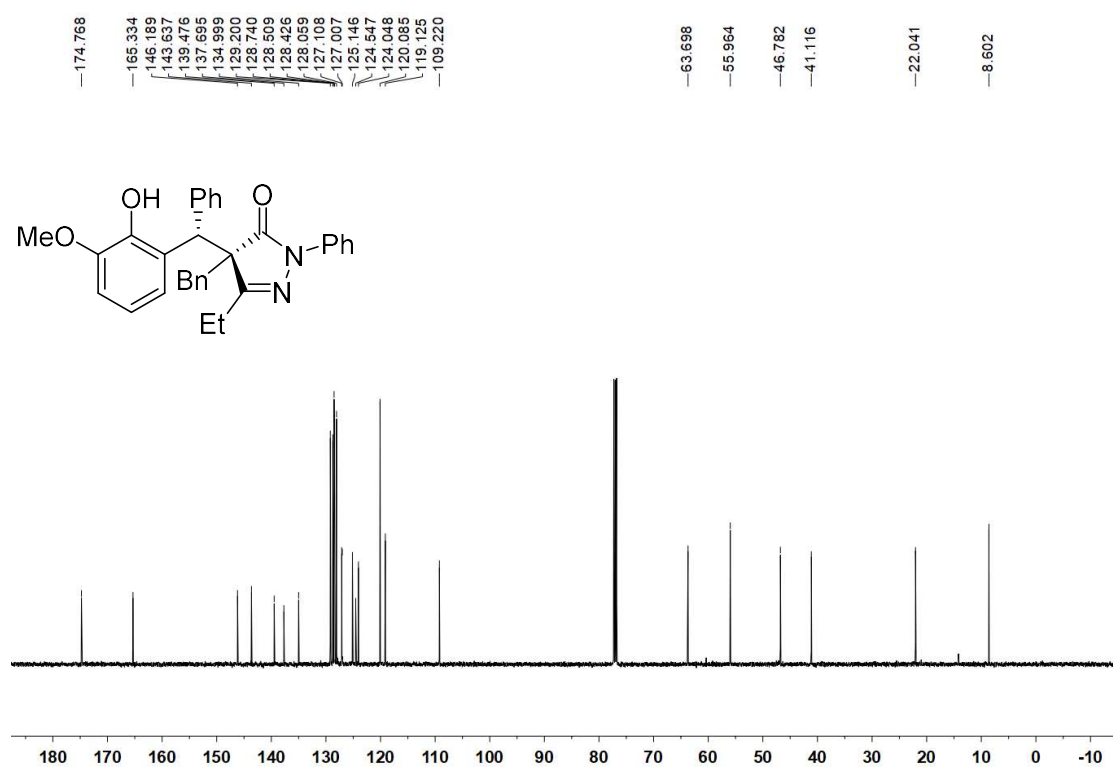

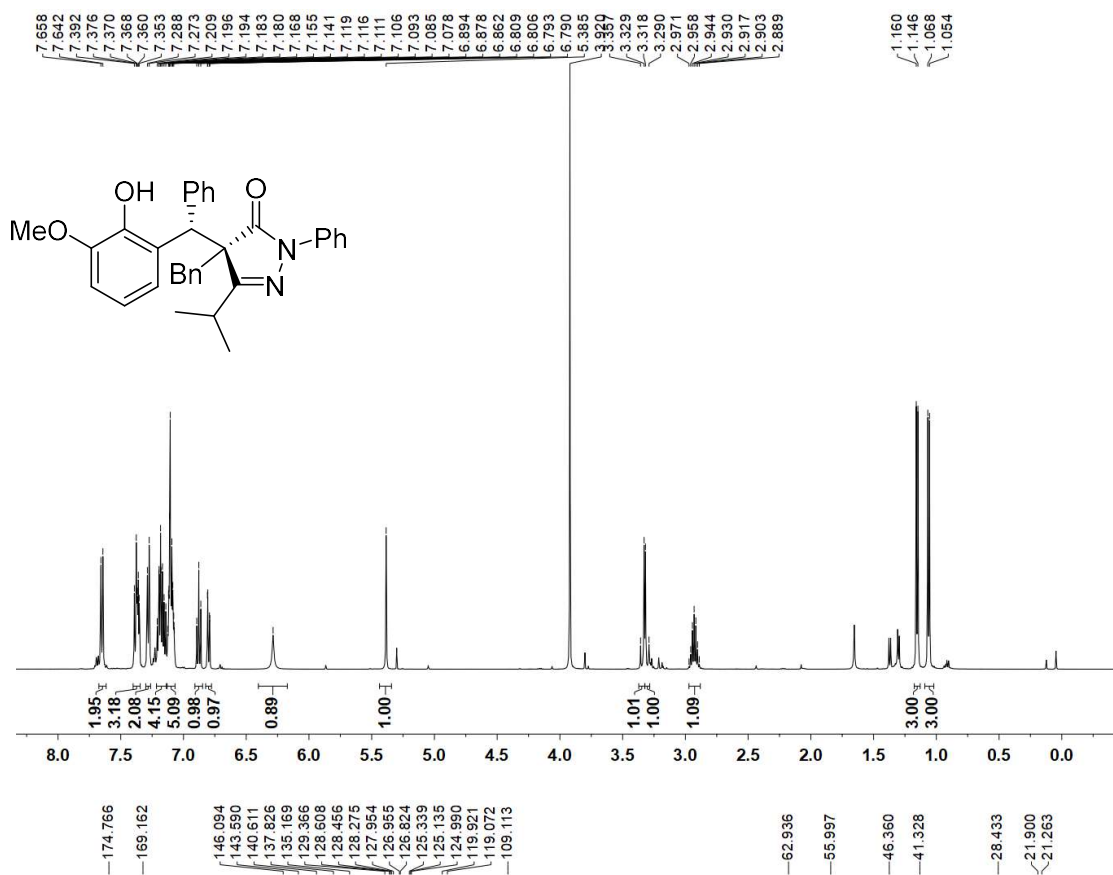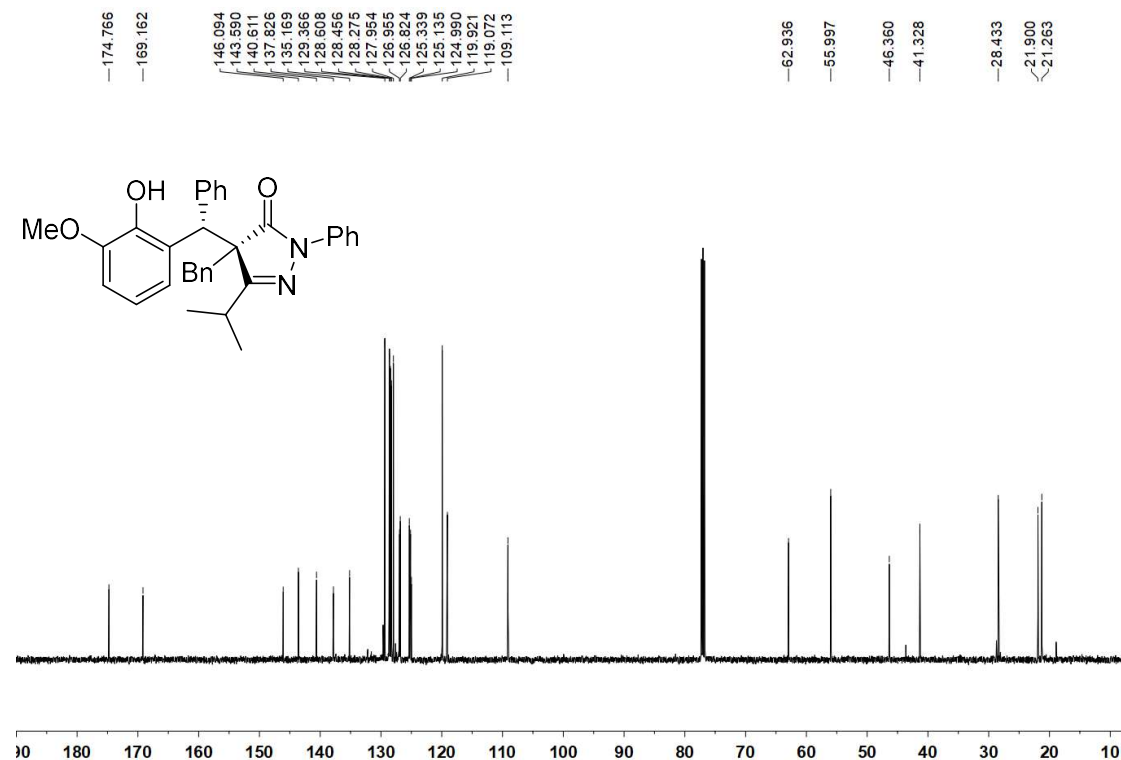

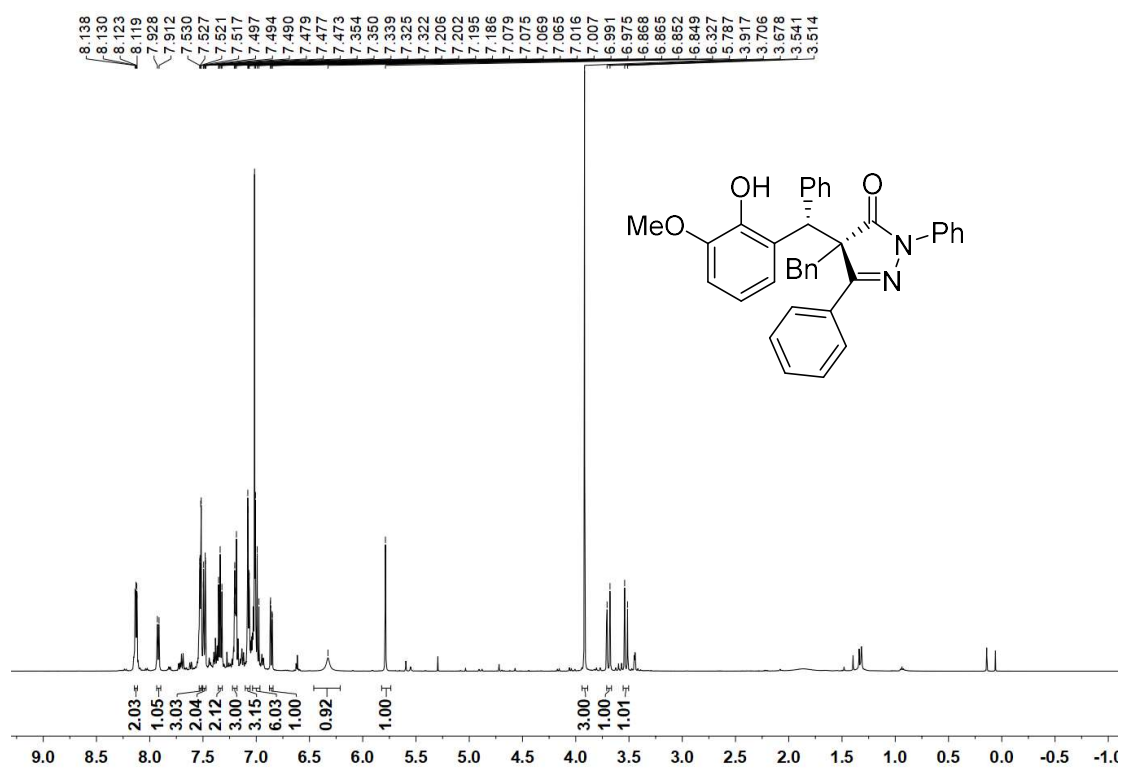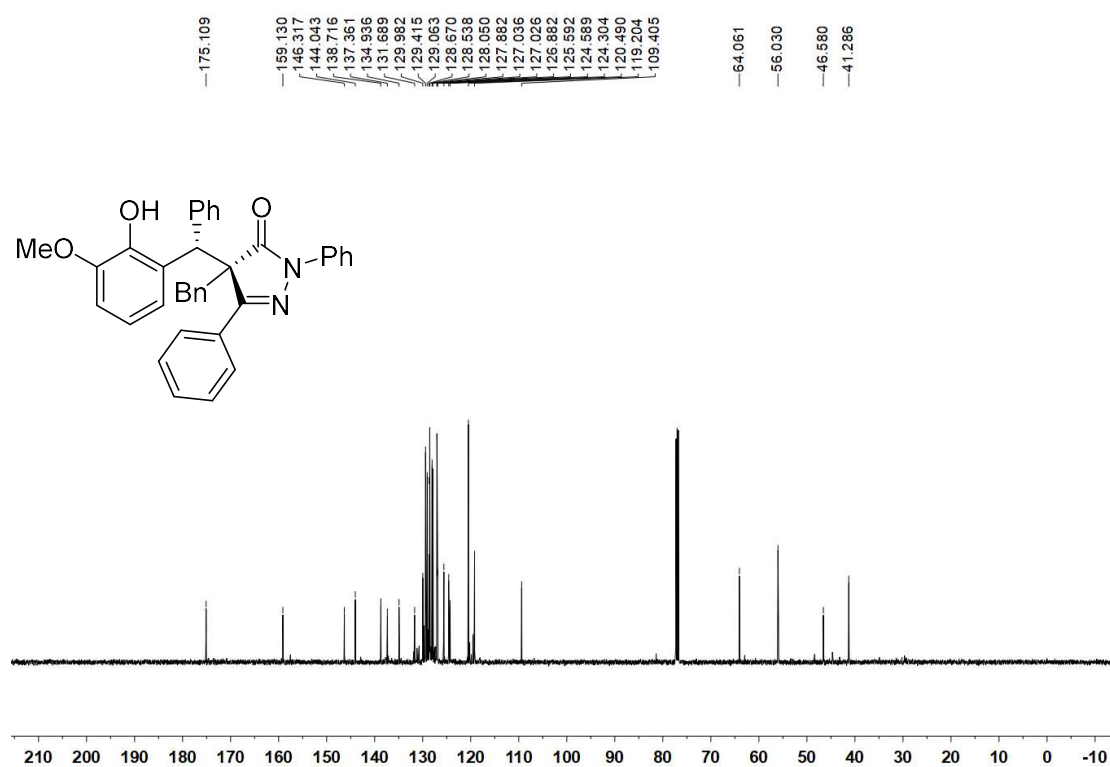

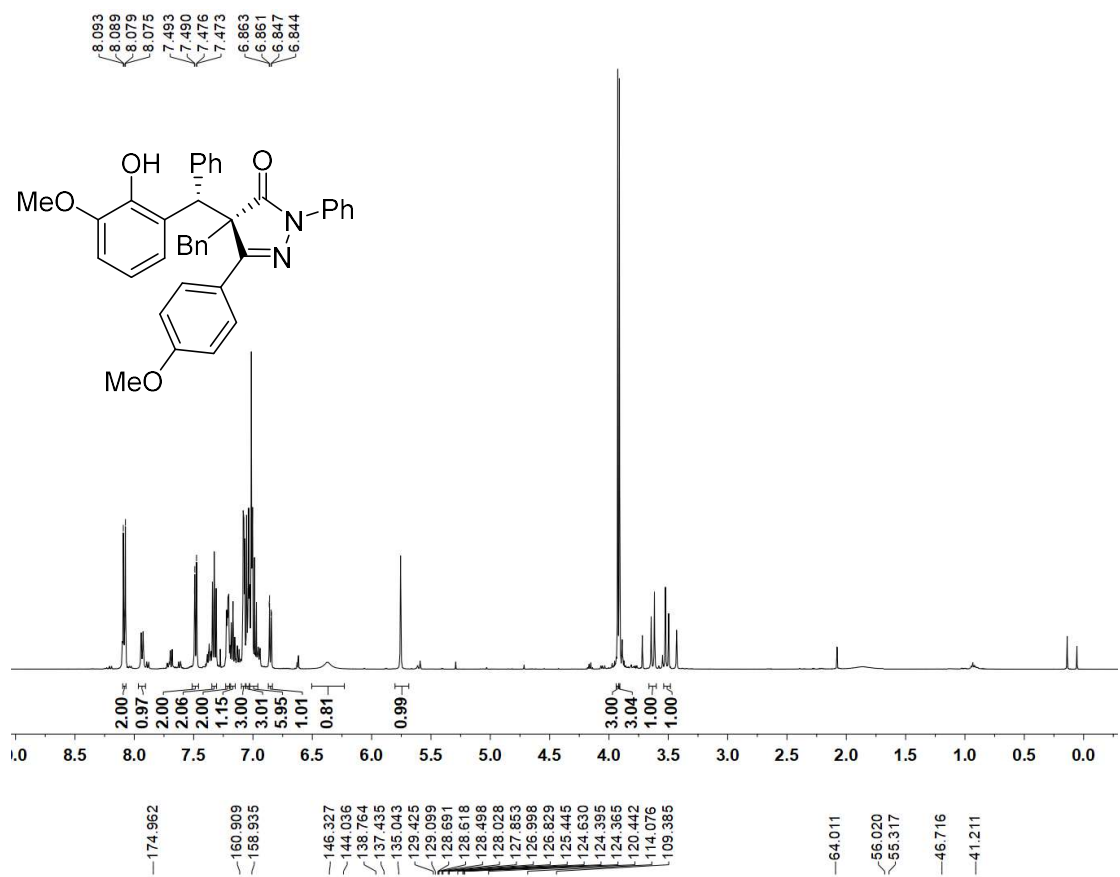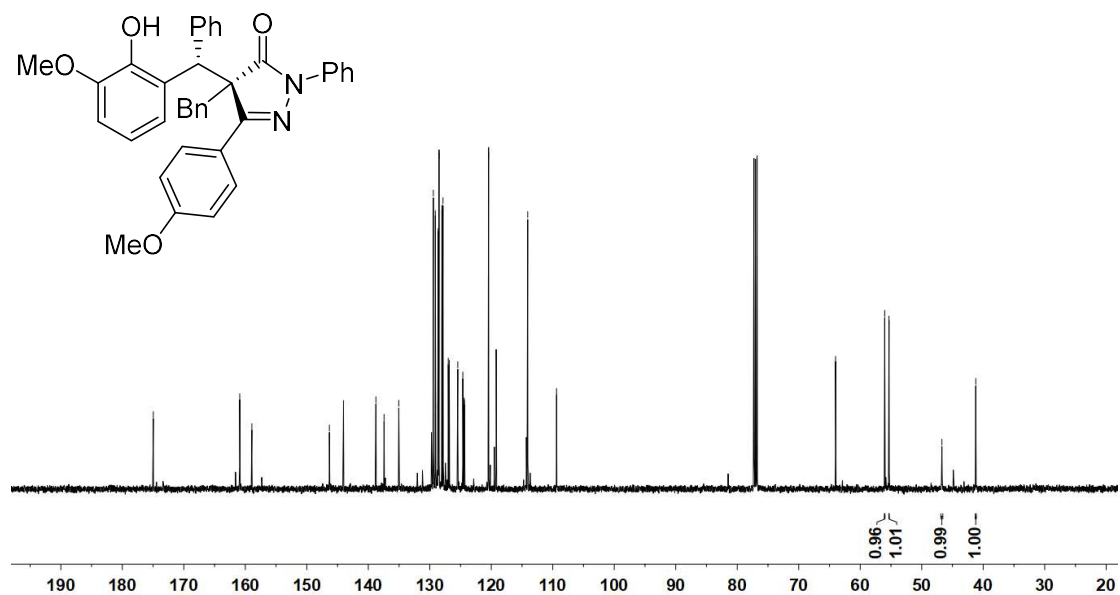

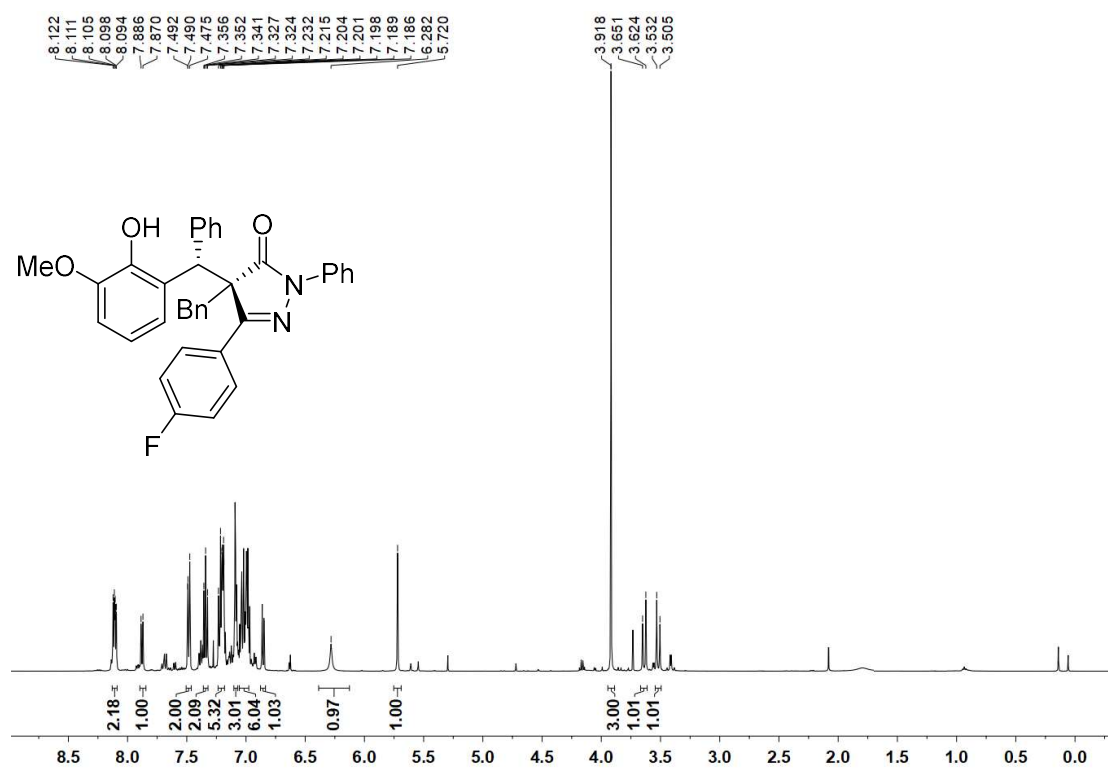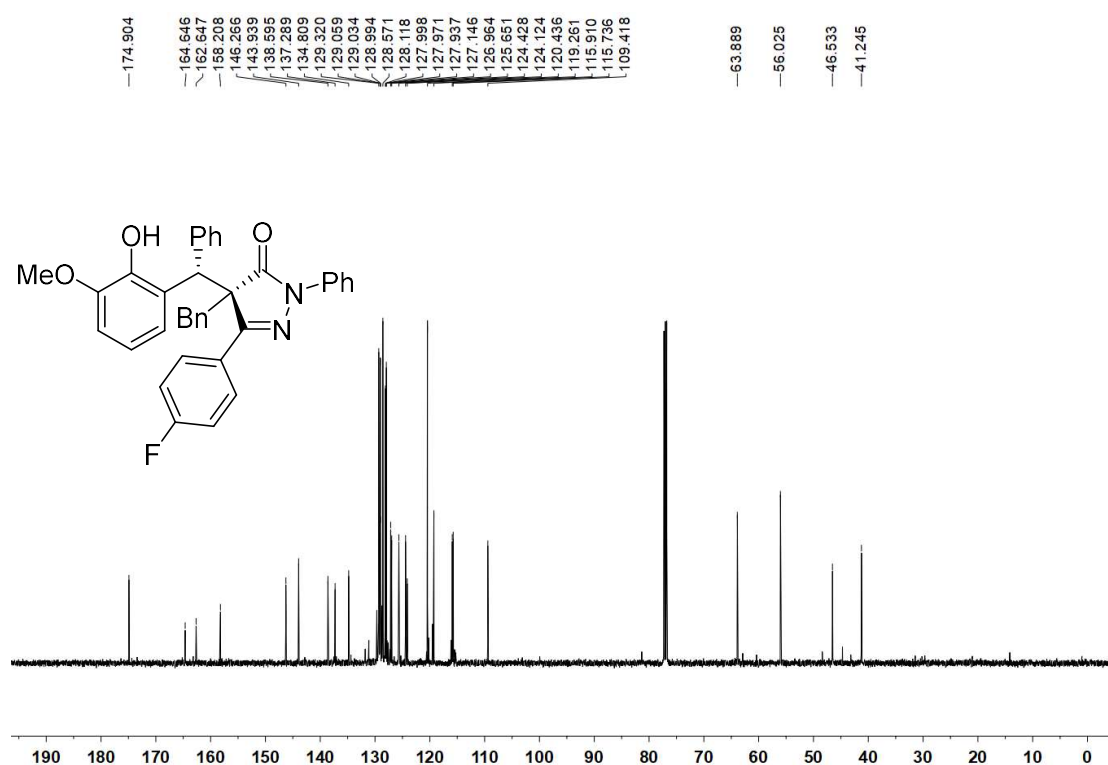

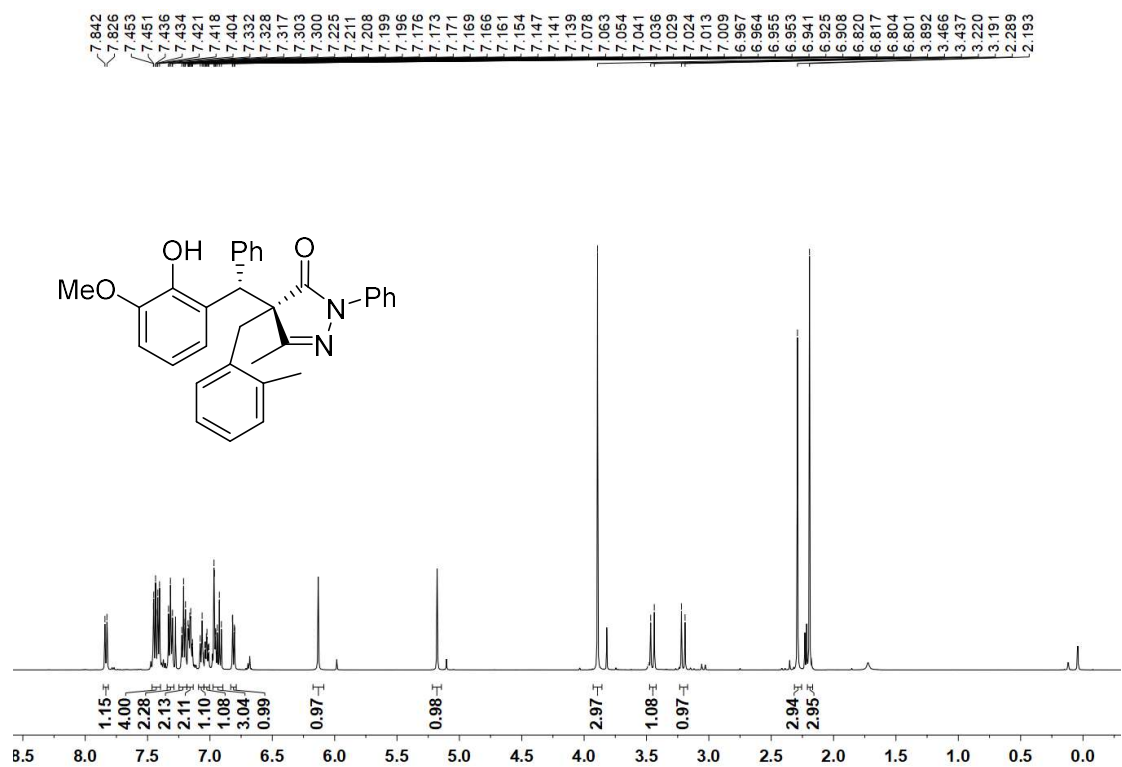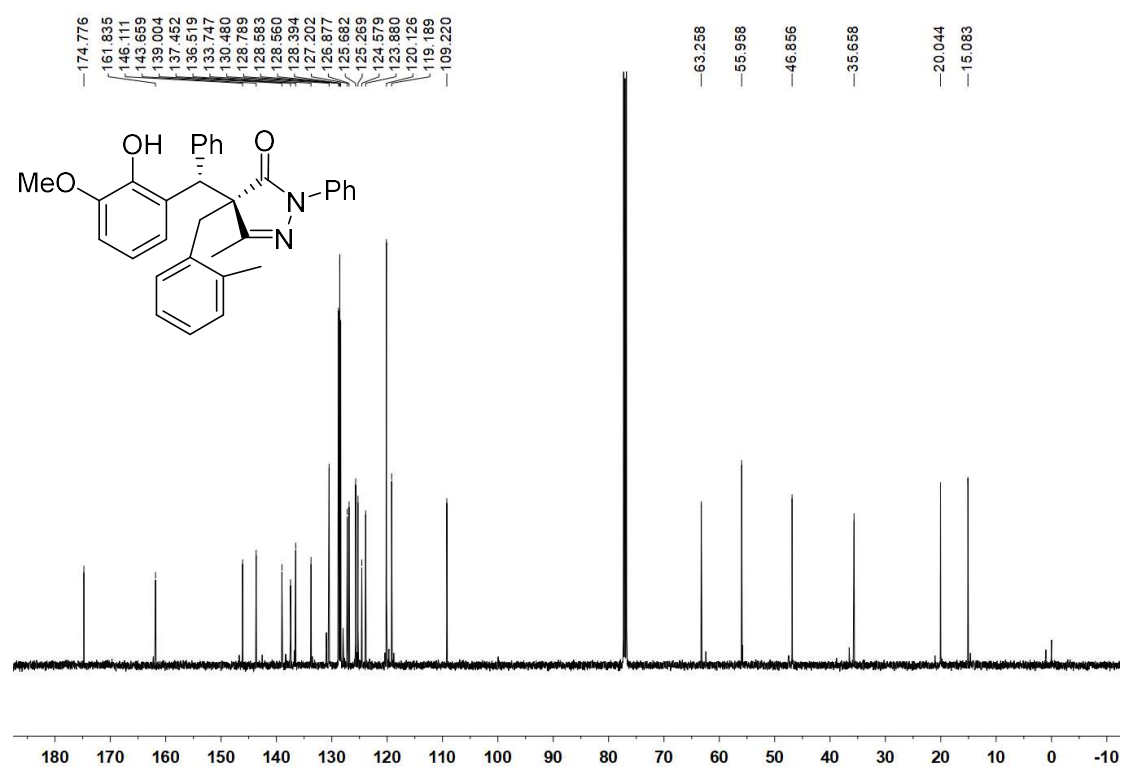

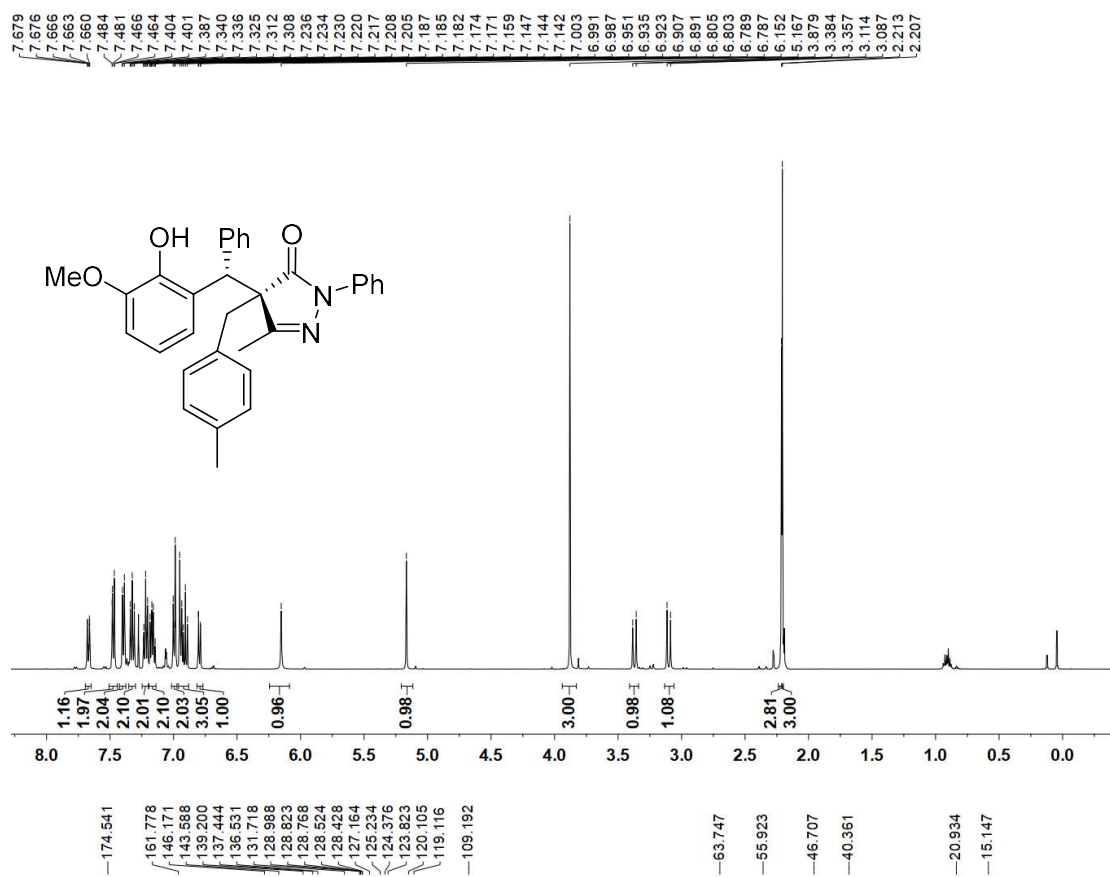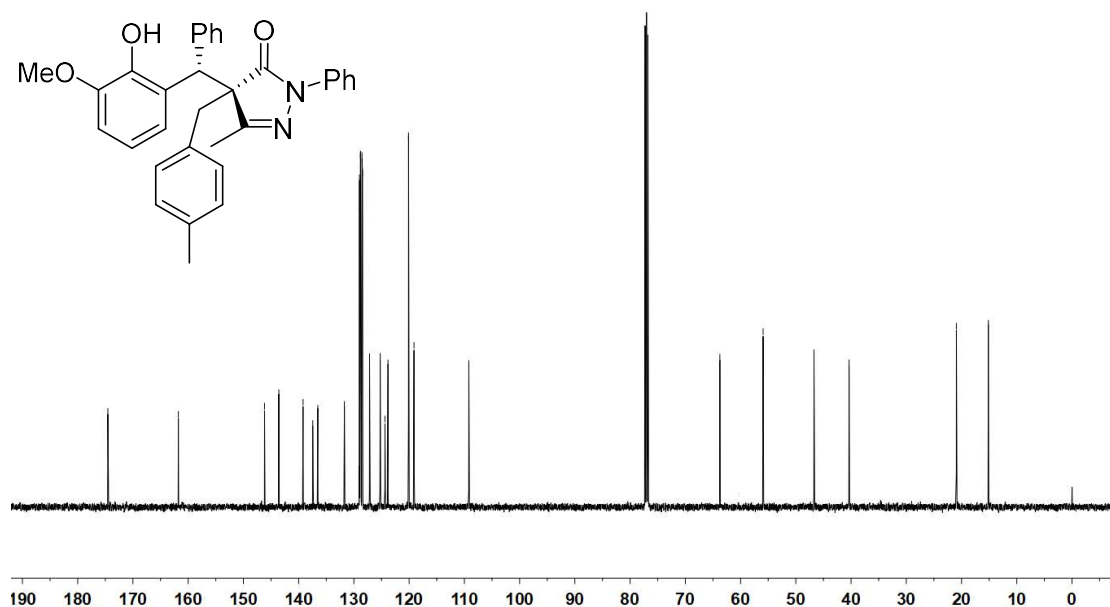

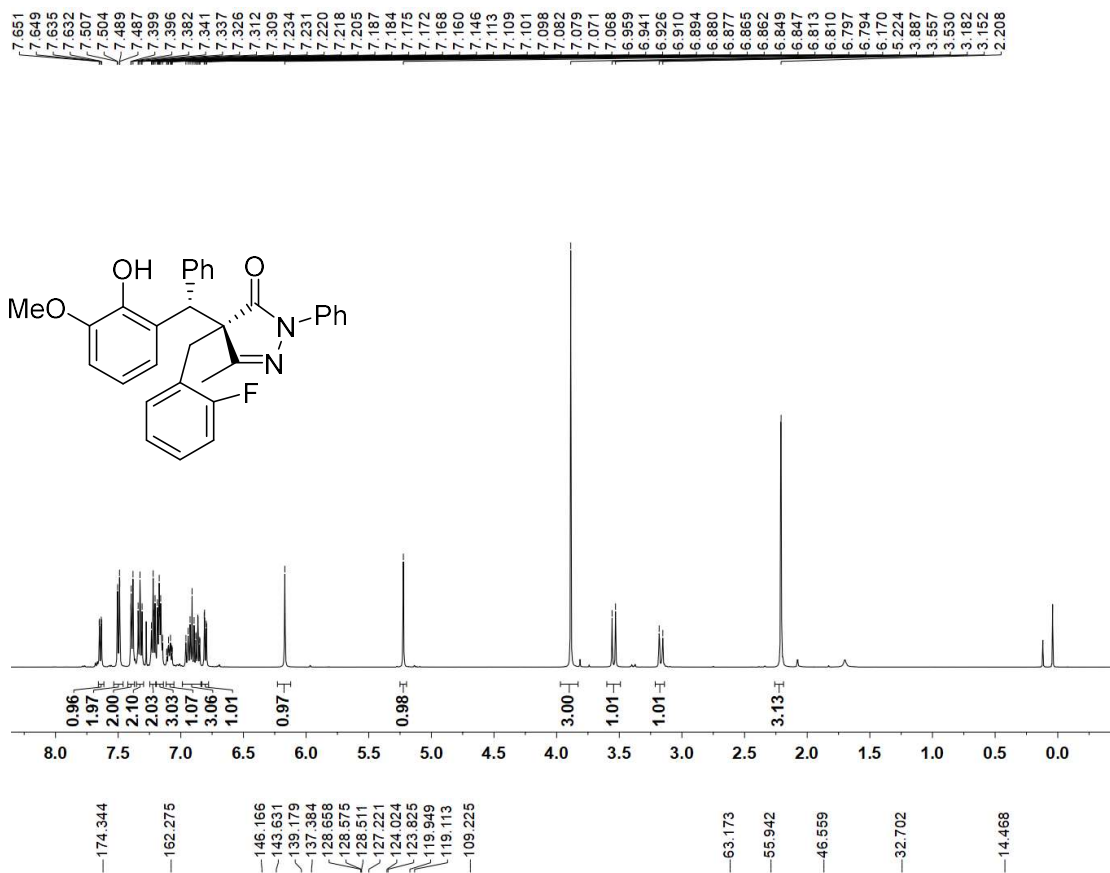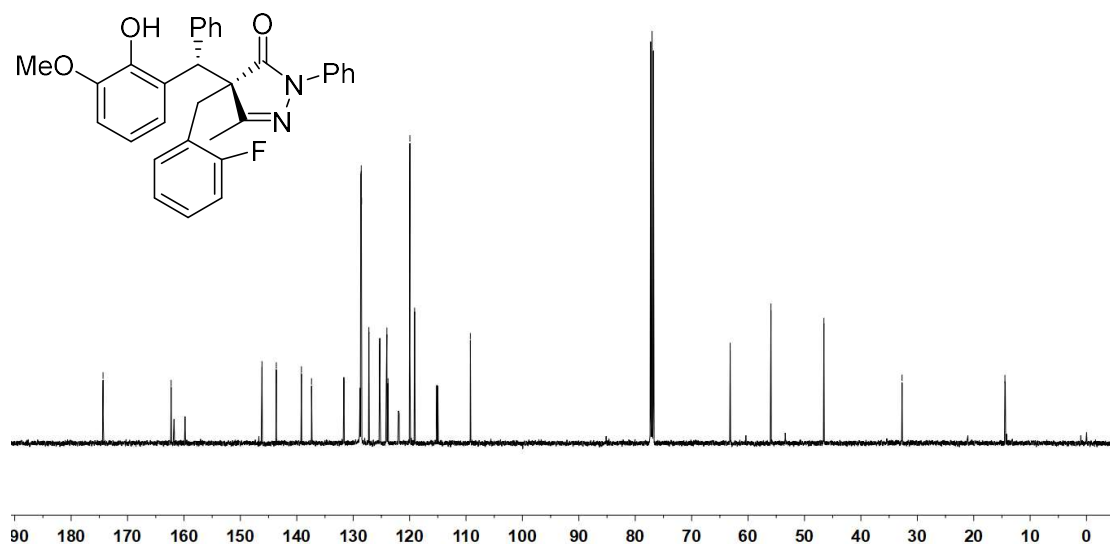

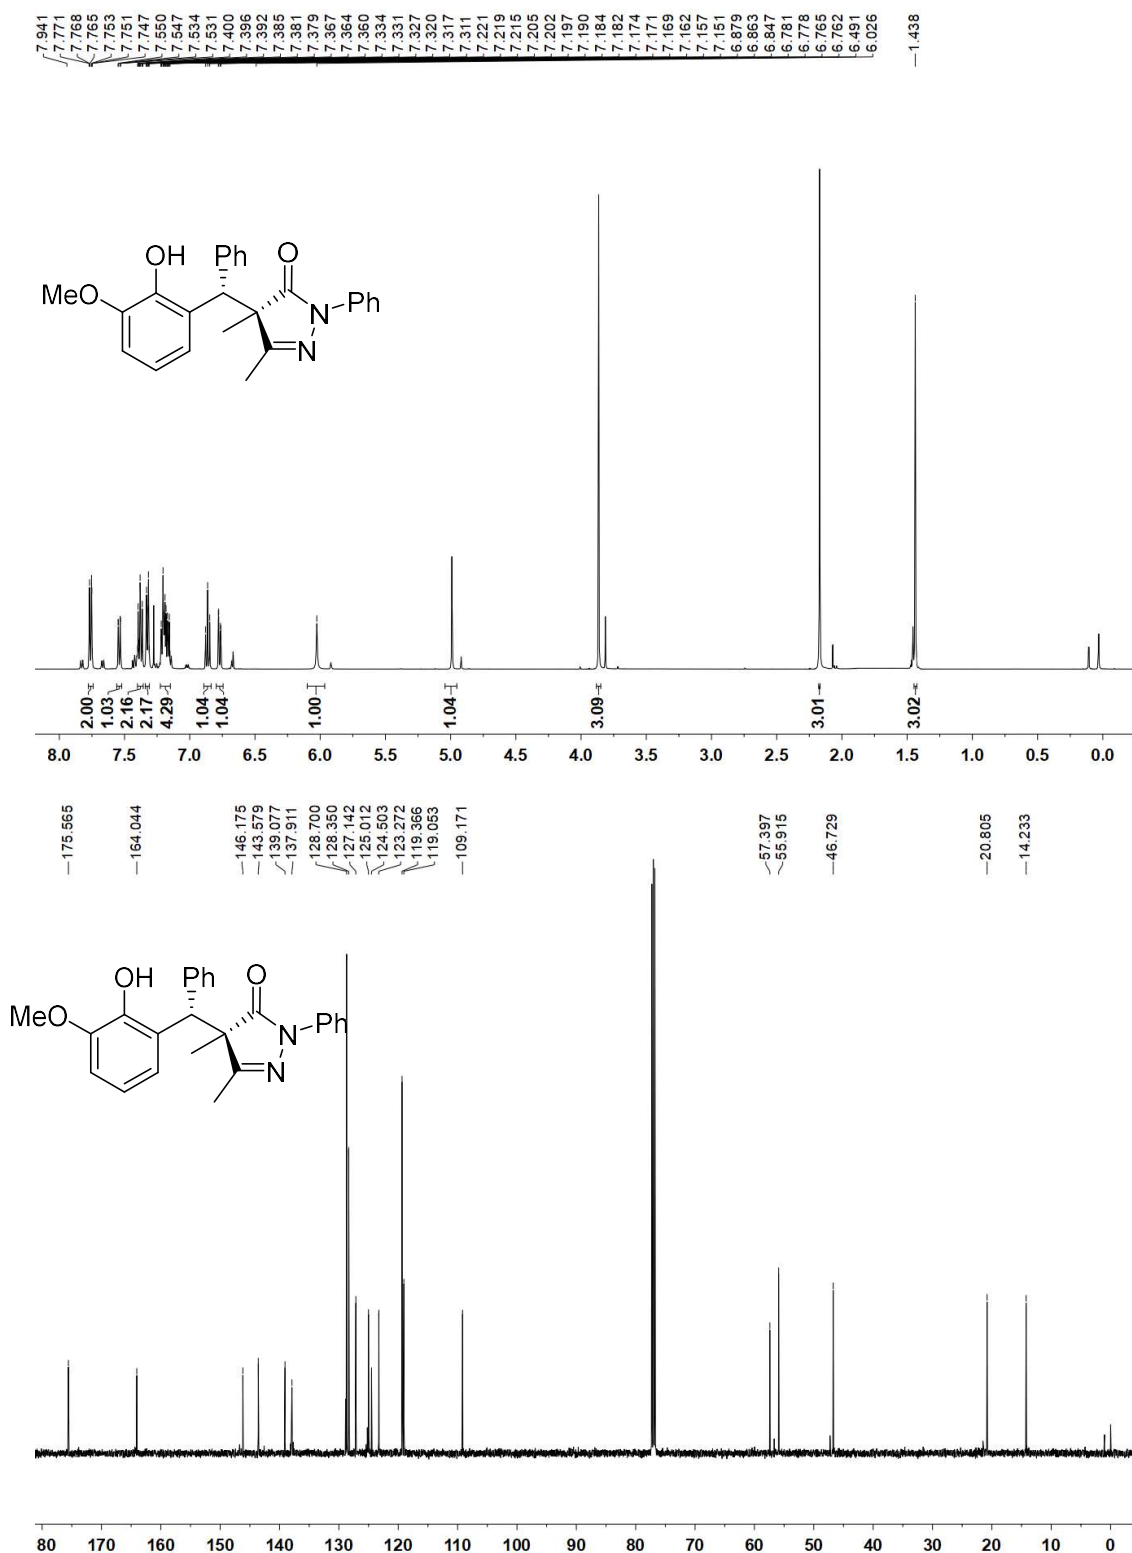

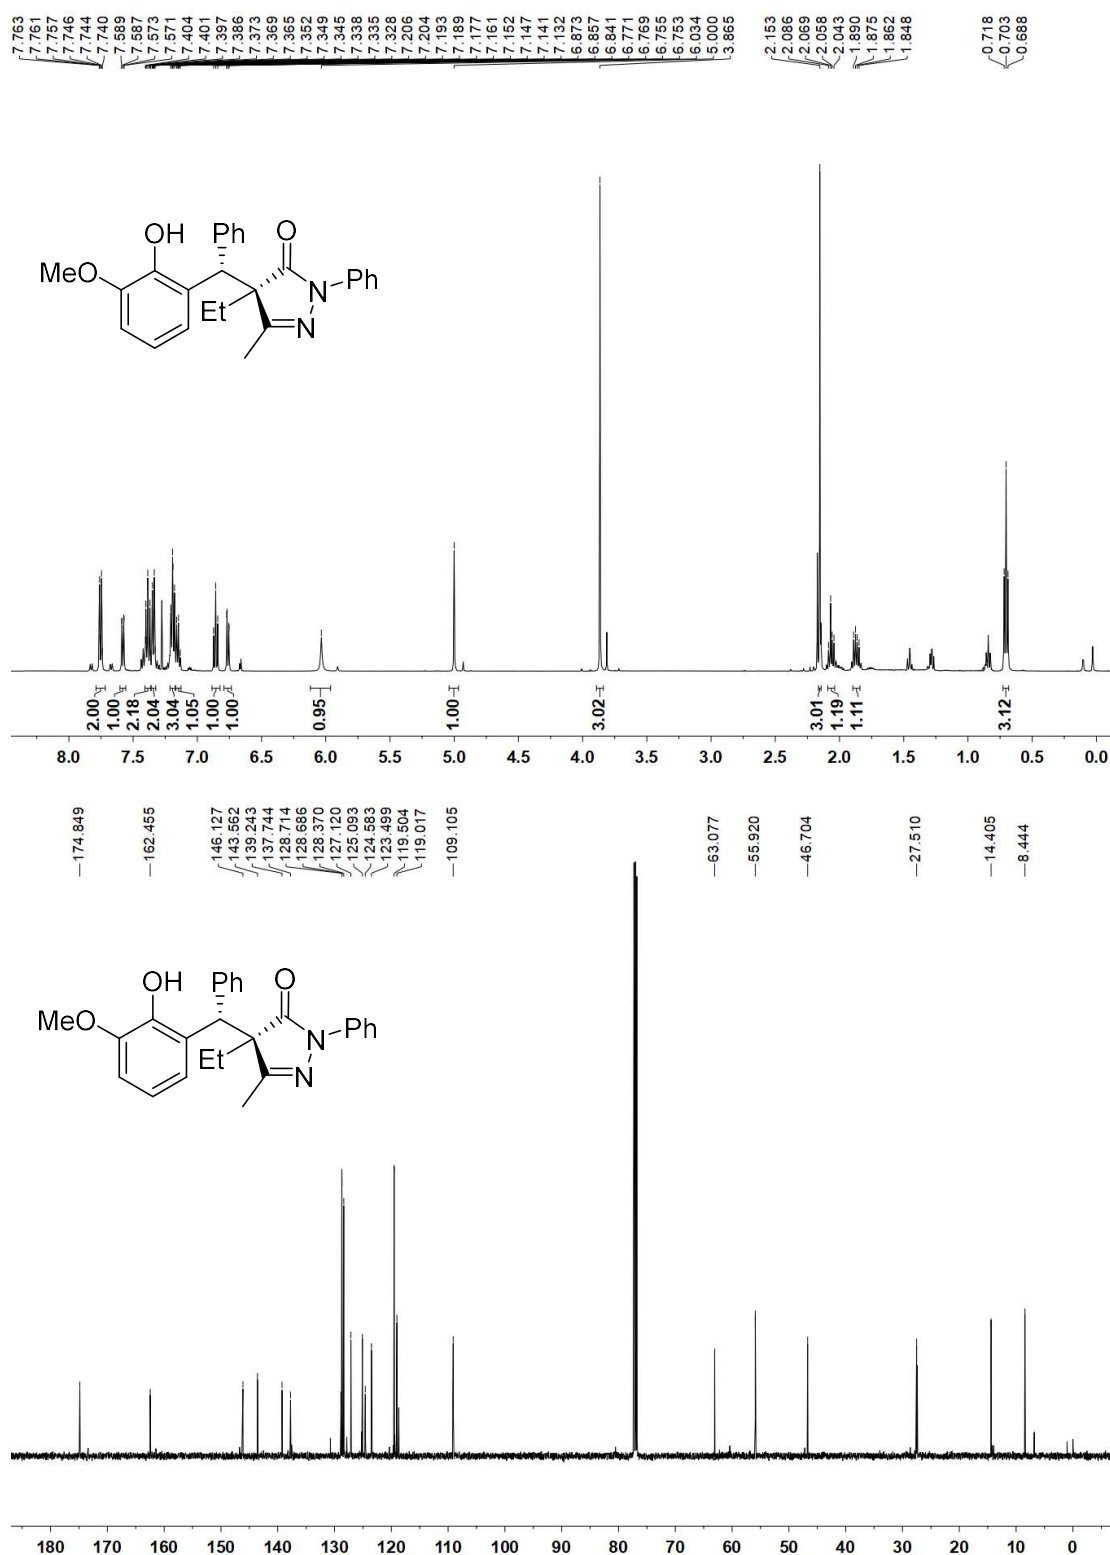

## 6. Crystal data and structure refinement for enantiopure **3ra**.

Crystals of enantiopure **3ra** suitable for X-ray analysis were obtained from crystallization in a solution of ethyl acetate and n-hexan

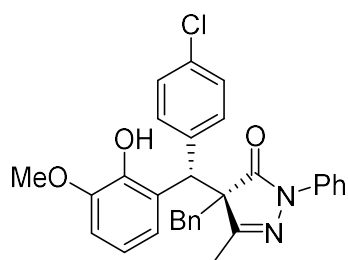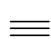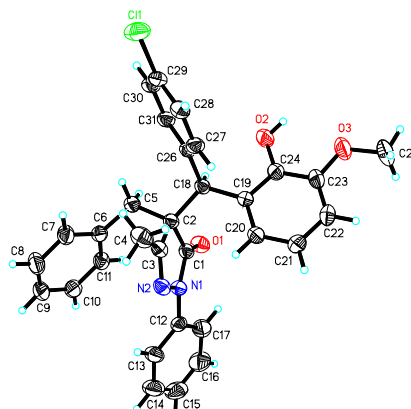

|                                   |                                                                  |          |
|-----------------------------------|------------------------------------------------------------------|----------|
| CCDC deposition number            | 1875350                                                          |          |
| Empirical formula                 | C <sub>31</sub> H <sub>27</sub> Cl N <sub>2</sub> O <sub>3</sub> |          |
| Formula weight                    | 529.01                                                           |          |
| Temperature                       | 296(2) K                                                         |          |
| Wavelength                        | 0.71073 Å                                                        |          |
| Crystal system                    | Orthorhombic                                                     |          |
| Space group                       | P 21 21 21                                                       |          |
| Unit cell dimensions              | a = 9.0064(3) Å                                                  | α = 90°. |
|                                   | b = 9.7885(3) Å                                                  | β = 90°. |
|                                   | c = 30.9078(11) Å                                                | γ = 90°. |
| Volume                            | 2724.80(16) Å <sup>3</sup>                                       |          |
| Z                                 | 4                                                                |          |
| Density (calculated)              | 1.290 Mg/m <sup>3</sup>                                          |          |
| Absorption coefficient            | 0.179 mm <sup>-1</sup>                                           |          |
| F(000)                            | 1112                                                             |          |
| Crystal size                      | 0.200 x 0.170 x 0.140 mm <sup>3</sup>                            |          |
| Theta range for data collection   | 2.182 to 25.996°.                                                |          |
| Index ranges                      | -11 ≤ h ≤ 10, -12 ≤ k ≤ 10, -34 ≤ l ≤ 38                         |          |
| Reflections collected             | 13582                                                            |          |
| Independent reflections           | 5302 [R(int) = 0.0320]                                           |          |
| Completeness to theta = 25.242°   | 99.0 %                                                           |          |
| Absorption correction             | Semi-empirical from equivalents                                  |          |
| Max. and min. transmission        | 0.7456 and 0.6367                                                |          |
| Refinement method                 | Full-matrix least-squares on F <sup>2</sup>                      |          |
| Data / restraints / parameters    | 5302 / 0 / 347                                                   |          |
| Goodness-of-fit on F <sup>2</sup> | 1.083                                                            |          |
| Final R indices [I > 2σ(I)]       | R1 = 0.0448, wR2 = 0.1069                                        |          |
| R indices (all data)              | R1 = 0.0615, wR2 = 0.1185                                        |          |
| Absolute structure parameter      | 0.02(3)                                                          |          |
| Extinction coefficient            | 0.030(5)                                                         |          |
| Largest diff. peak and hole       | 0.202 and -0.242 e.Å <sup>-3</sup>                               |          |
